# Supplementary material for: Imidazoliumyl-substituted di- and iso-tetraphosphanes and their metal-mediated fragmentation reactions
Source: Royal Society of Chemistry journal article supplement (doi:10.1039/d6sc02577c), 2026-05-28
Supplement: d6sc02577c1.pdf [file d6sc02577c1.pdf]

## Electronic Supplementary Information

# Imidazoliumyl-Substituted Di- and Iso-Tetrachosphanes and Their Metal-Mediated Fragmentation Reactions

Jannis Fidelius,<sup>a,†</sup> Clemens Taube,<sup>a,†</sup> Kai Schwedtmann,<sup>a</sup> Felix Hennersdorf,<sup>a</sup> Antonio Frontera,<sup>b</sup> Robert  
Wolf,<sup>\*,c</sup> and Jan J. Weigand<sup>\*,a</sup>

<sup>†</sup>These authors contributed equally to this work.

<sup>a</sup>Faculty of Chemistry and Food Chemistry, Technische Universität Dresden, 01062 Dresden, Germany

[\*] E-mail: jan.weigand@tu-dresden.de

<sup>b</sup>Department of Chemistry, Universitat de Illes Balears, 07122 Palma de Mallorca, Spain

<sup>c</sup>Institute of Inorganic Chemistry, Universität Regensburg, 93040 Regensburg, Germany

[\*] E-mail: robert.wolf@ur.de

# Table of contents

|                                                                                                                               |           |
|-------------------------------------------------------------------------------------------------------------------------------|-----------|
| <b>1. General remarks, materials and methods</b> .....                                                                        | <b>4</b>  |
| <b>2. Synthetic Details and Characterization Data</b> .....                                                                   | <b>5</b>  |
| 2.1. Synthesis of Imidazoliumyl-substituted Chlorophosphate Salts 2a-c[OTf].....                                              | 5         |
| 2.1.1. Preparation of $[L_cP(Cy)Cl][OTf]$ ( <b>2a</b> [OTf]) .....                                                            | 5         |
| 2.1.2. Preparation of $[L_cP(Ph)Cl][OTf]$ ( <b>2b</b> [OTf]) .....                                                            | 8         |
| 2.1.3. Variable Temperature NMR Studies.....                                                                                  | 11        |
| 2.2. Synthesis of Imidazoliumyl-substituted Diphosphate Salts 5a-c[OTf] <sub>2</sub> .....                                    | 12        |
| 2.2.1. Preparation of $[(L_cPCy)_2][OTf]_2$ ( <b>5a</b> [OTf] <sub>2</sub> ).....                                             | 12        |
| 2.2.2. Preparation of $[(L_cPPh)_2][OTf]_2$ ( <b>5b</b> [OTf] <sub>2</sub> ).....                                             | 15        |
| 2.2.3. Preparation of $[(L_cPPy)_2][OTf]_2$ ( <b>5c</b> [OTf] <sub>2</sub> ).....                                             | 18        |
| 2.2.4. Variable Temperature NMR Studies.....                                                                                  | 21        |
| 2.3. Synthesis of Imidazoliumyl-substituted <i>iso</i> -Tetraphosphate Salts 6a,b[OTf] <sub>3</sub> .....                     | 23        |
| 2.3.1. Preparation of $[(L_cPCy)_3P][OTf]_3$ ( <b>6a</b> [OTf] <sub>3</sub> ).....                                            | 23        |
| 2.3.2. Preparation of $[(L_cPPh)_3P][OTf]_3$ ( <b>6b</b> [OTf] <sub>3</sub> ).....                                            | 26        |
| 2.3.3. Synthesis of crude $[(L_cPPy)_3P][OTf]_3$ ( <b>6c</b> [OTf] <sub>3</sub> ).....                                        | 29        |
| 2.3.4. Variable Temperature NMR Studies.....                                                                                  | 30        |
| 2.4. Reactions of Imidazoliumyl-substituted Diphosphates 5a,b[OTf] <sub>2</sub> with Pd(PPh <sub>3</sub> ) <sub>4</sub> ..... | 32        |
| 2.4.1. Preparation of $[(L_cPCy)(PdPPh_3)_2][OTf]_2$ ( <b>7a</b> [OTf] <sub>2</sub> ).....                                    | 32        |
| 2.4.2. Preparation of $[(L_cPPh)(PdPPh_3)_2][OTf]_2$ ( <b>7b</b> [OTf] <sub>2</sub> ).....                                    | 35        |
| 2.4.3. Preparation of $[(iPrIm)(PdPPh_3)_2(CyP=PCy)][OTf]_2$ ( <b>8</b> [OTf] <sub>2</sub> ).....                             | 38        |
| 2.5. Reactions of Imidazoliumyl-substituted <i>iso</i> -Tetraphosphates 6a,b[OTf] <sub>3</sub> with Nucleophiles .....        | 42        |
| 2.5.1. Preparation of $[(L_cPCy)_2PPd(\eta^3-C_3H_5)][OTf]_2$ ( <b>9</b> [OTf] <sub>2</sub> ).....                            | 42        |
| 2.5.2. Preparation of $[(L_cPCy)_2PAu(PPh_3)][OTf]_2$ ( <b>10</b> [OTf] <sub>2</sub> ).....                                   | 45        |
| 2.5.3. Preparation of $[(L_cPCy)_2P][OTf]$ ( <b>11</b> [OTf]) .....                                                           | 50        |
| 2.5.4. Preparation of $[(L_c)_2PCy][OTf]_2$ ( <b>12</b> [OTf] <sub>2</sub> ).....                                             | 55        |
| 2.5.5. Reaction of <b>6a</b> [OTf] <sub>3</sub> with Ph <sub>4</sub> PCL.....                                                 | 58        |
| <b>3. Computational Investigations</b> .....                                                                                  | <b>59</b> |
| 3.1. Conformer Search for 2b[OTf] .....                                                                                       | 60        |
| 3.2. Frontier Molecular Orbitals and WBI of 7b[OTf] <sub>2</sub> .....                                                        | 61        |
| 3.3. Cartesian Coordinates .....                                                                                              | 62        |
| <b>4. X-ray Diffraction Refinements</b> .....                                                                                 | <b>74</b> |
| 4.1. General Remarks.....                                                                                                     | 74        |
| 4.2. Crystallographic data .....                                                                                              | 75        |
| <b>5. References</b> .....                                                                                                    | <b>78</b> |



## 1. General remarks, materials and methods

**Manipulations** were performed in a Glovebox MB Unilab or using Schlenk techniques under an atmosphere of purified nitrogen or argon, respectively. All glassware was oven-dried at 160 °C prior to use.

Dry, oxygen-free **solvents** ( $\text{CH}_2\text{Cl}_2$ ,  $\text{C}_6\text{H}_5\text{F}$ , *o*- $\text{C}_6\text{H}_4\text{F}_2$ ,  $\text{CH}_3\text{CN}$ ,  $\text{MeNO}_2$ ,  $\text{C}_2\text{H}_4\text{Cl}_2$  (distilled from  $\text{CaH}_2$ ), *n*-hexane, *n*-pentane, THF,  $\text{Et}_2\text{O}$ , Toluene, Benzene (distilled from potassium)) were employed. All distilled and deuterated solvents were stored over 4 Å molecular sieves (except  $\text{CD}_3\text{CN}$  and  $\text{CH}_3\text{CN}$  3 Å molecular sieves). Compounds **2c**[OTf]<sup>1</sup> and  $(\text{Me}_3\text{Si})_2\text{Pyrazine}$  **4**<sup>2</sup>, were synthesized according to literature procedures. Additional reagents were obtained from commercial sources and used as received.

**NMR spectra** were measured on a Bruker *AVANCE III HD Nanobay 400 MHz UltraSield* (<sup>1</sup>H (400.13 MHz), <sup>13</sup>C (100.61 MHz), <sup>31</sup>P (161.98 MHz) <sup>195</sup>Pt (86.01 MHz)) or on a Bruker *AVANCE III HDX, 500 MHz Ascend* (<sup>1</sup>H (500.13 MHz), <sup>13</sup>C (125.75 MHz), <sup>31</sup>P (202.45 MHz)). All <sup>13</sup>C NMR spectra were exclusively recorded with composite pulse decoupling. Reported numbers assigning atoms in the <sup>13</sup>C spectra were indirectly deduced from the cross-peaks in 2D correlation experiments (HMBC, HSQC). Chemical shifts were referenced to  $\delta_{\text{TMS}} = 0.00$  ppm (<sup>1</sup>H, <sup>13</sup>C),  $\delta_{\text{H}_3\text{PO}_4(85\%)} = 0.00$  ppm (<sup>31</sup>P) and  $\delta_{\text{K}_2\text{PtCl}_6} = 0.00$  ppm (<sup>195</sup>Pt). Chemical shifts ( $\delta$ ) are reported in ppm. Coupling constants (*J*) are reported in Hz.

**Melting points** were recorded on an electrothermal melting point apparatus (Büchi Switzerland, Melting point M-560) in sealed capillaries under Argon atmosphere or were deduced from STA measurements and are uncorrected.

**Infrared (IR)** and **Raman** spectra were recorded at ambient temperature using a *Bruker Vertex 70* instrument equipped with a RAM II module (Nd-YAG laser, 1064 nm). The Raman intensities are reported in percent relative to the most intense peak and are given in parenthesis. An ATR unit (diamond) was used for recording IR spectra. The intensities are reported relative to the most intense peak and are given in parenthesis using the following abbreviations: vw = very weak, w = weak, m = medium, s = strong, vs = very strong.

**Elemental analyses** were performed on a *Vario MICRO cube* Elemental Analyzer by Elementar Analysatorsysteme GmbH in CHNS mode.

## 2. Synthetic Details and Characterization Data

### 2.1. Synthesis of Imidazoliumyl-substituted Chlorophosphane Salts 2a-c[OTf]

#### 2.1.1. Preparation of [LcP(Cy)Cl][OTf] (2a[OTf])

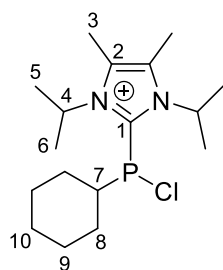

A solution of 345 mg CyPCl<sub>2</sub> (1.5 equiv., 1.875 mmol) in 2 mL C<sub>6</sub>H<sub>5</sub>F is added to a solution of 500 mg **1**[OTf] (1 equiv., 1.24 mmol) in 4 mL C<sub>6</sub>H<sub>5</sub>F. The colorless solution is stirred three days at 100°C. The volume of the resulting solution is reduced *in vacuo*. Addition of 3 mL *n*-hexane leads to an off-white oil, which is stirred for 16 h. The resulting solid is filtered and washed with 3x1 mL diethyl ether.

Drying *in vacuo* affords the product as an off-white powder. Suitable crystals for X-ray diffraction analysis can be obtained by diffusion of Et<sub>2</sub>O into a saturated CH<sub>3</sub>CN solution at -30°C.

**Yield:** 440 mg (74%); **m.p.** 127.0°C (dec.); **Raman** (100 mW, 50 scans, 298 K, [cm<sup>-1</sup>]): 2972 (45), 2948 (98), 2935 (100), 2901 (36), 2855 (44), 1611 (34), 1445 (53), 1412 (37), 1401 (30), 1388 (18), 1363 (39), 1301 (10), 1276 (97), 1223 (10), 1204 (9), 1143 (16), 1033 (65), 1004 (12), 884 (20), 852 (14), 819 (10), 791 (17), 760 (21), 752 (30), 581 (14), 572 (13), 544 (14), 497 (50), 458 (14), 429 (15), 347 (20), 310 (23), 289 (15), 279 (14), 222 (14); **IR** (ATR, 298 K, [cm<sup>-1</sup>]): 2991 (vw), 2931 (w), 2855 (vw), 1610 (vw), 1455 (vw), 1411 (w), 1260 (vs), 1220 (m), 1146 (vs), 1114 (w), 1087 (w), 1030 (vs), 1003 (w), 901 (w), 851 (w), 790 (w), 759 (w), 750 (w), 635 (vs); **<sup>1</sup>H NMR** (CD<sub>3</sub>CN, 300 K, in ppm)  $\delta$  = 1.27 - 1.47 (6H, m, H8/9/10), 1.59 (6H, d, <sup>3</sup>J(HH) = 7.0 Hz, H5/6), 1.69 - 1.77 (2H, m, H9/10), 1.81 - 1.9 (2H, m, H9/10), 2.38 (6H, s, H3), 2.70 - 2.80 (1H, m, H7), 5.34 (2H, br, H4); **<sup>13</sup>C{<sup>1</sup>H} NMR** (CD<sub>3</sub>CN, 300 K, in ppm):  $\delta$  = 11.12 (2C, br. s, C3), 21.46 (4C, br. s, C5/C6), 26.15 (1C, s, C10), 26.38 (1C, s, C9), 26.52 (1C, s, C9), 28.45 (1C, br. s, C8), 28.66 (1C, br. s, C8), 41.93 (1C, d, <sup>1</sup>J(CP) = -27 Hz, C7), 53.95 (1C, s, C4), 54.07 (1C, s, C4), 122.21 (1C, q, <sup>1</sup>J(CF) = -321 Hz, OTf), 133.88 (4C, br. s, C2), 139.25 (1C, d, <sup>1</sup>J(CP) = -86 Hz, C1); **<sup>19</sup>F{<sup>1</sup>H} NMR** (CD<sub>3</sub>CN, 300 K, in ppm):  $\delta$  = -79.27 (s); **<sup>31</sup>P{<sup>1</sup>H} NMR** (CD<sub>3</sub>CN, 300 K, in ppm):  $\delta$ (P) = 55.6 br. s.; **elemental analysis:** calculated for C<sub>18</sub>H<sub>31</sub>ClF<sub>3</sub>N<sub>2</sub>O<sub>3</sub>PS: N 5.85, C 45.14, H 6.52, S 6.69; found: N 5.90, C 45.18, H 6.286, S 6.882.

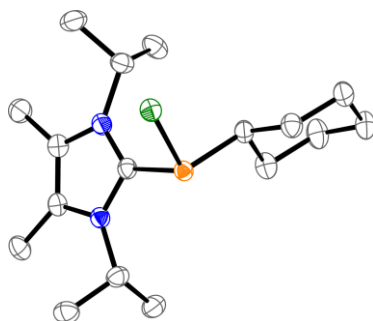

**Figure S1:** Molecular structure of cation  $2a^+$  in  $2a[OTf]$  (hydrogen atoms, solvate molecules, and anions are omitted for clarity and ellipsoids are set at 50% probability).

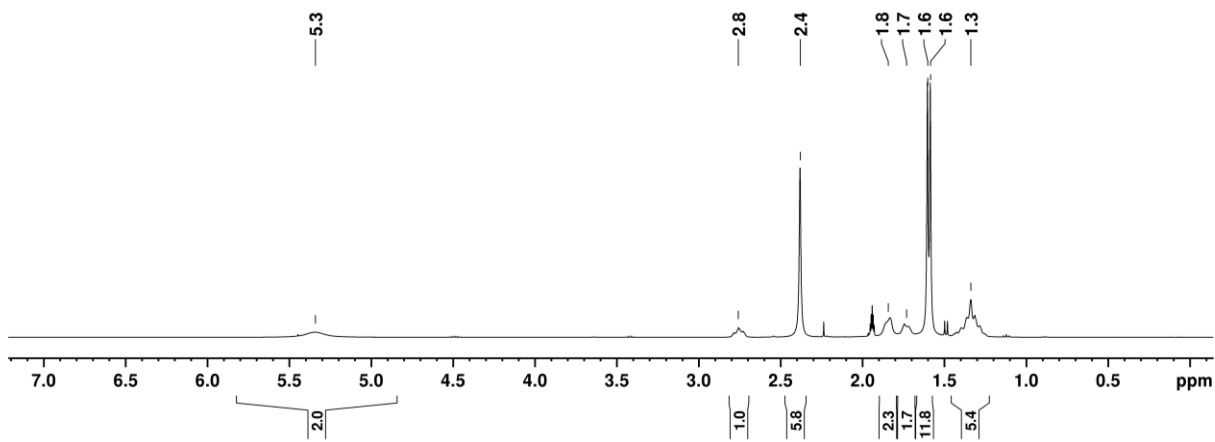

**Figure S2:**  $^1H$  NMR-spectrum of  $2a[OTf]$  in  $CD_3CN$  at 300 K.

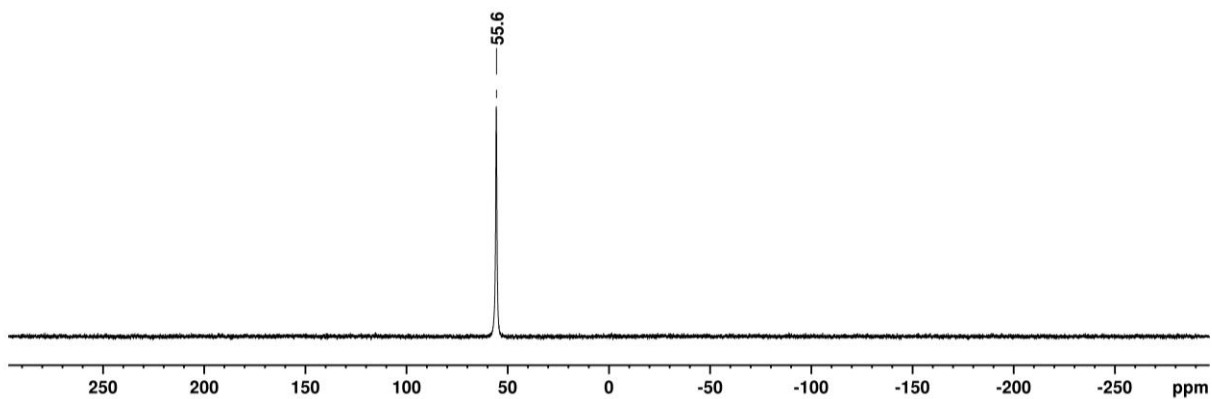

**Figure S3:**  $^{31}P$  NMR-spectrum of  $2a[OTf]$  in  $CD_3CN$  at 300 K.

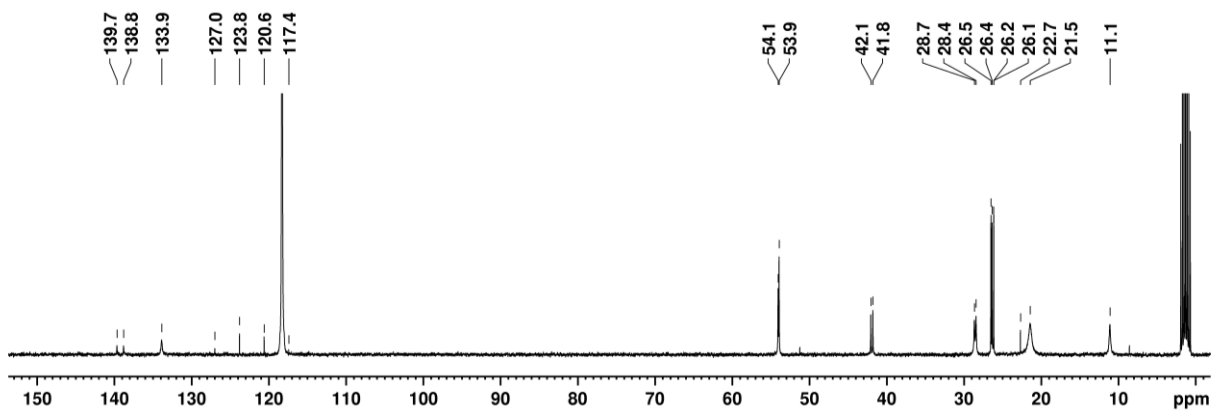

**Figure S4:**  $^{13}\text{C}\{^1\text{H}\}$  NMR-spectrum of **2a**[OTf] in  $\text{CD}_3\text{CN}$  at 300 K.

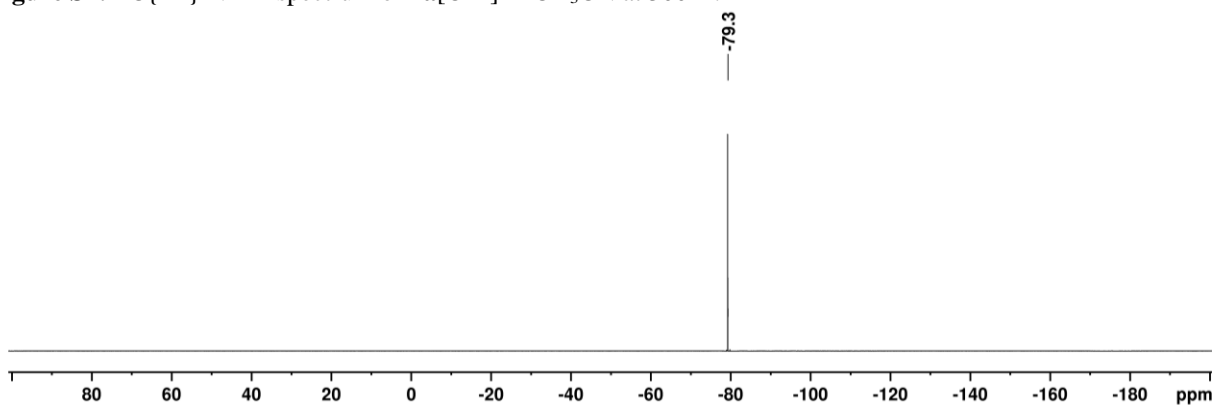

**Figure S5:**  $^{19}\text{F}$  NMR-spectrum of **2a**[OTf] in  $\text{CD}_3\text{CN}$  at 300 K.

### 2.1.2. Preparation of [LcP(Ph)Cl][OTf] (**2b**[OTf])

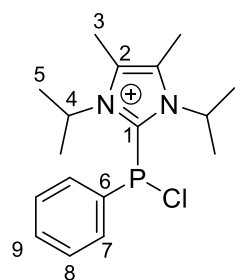

0.8 mL PhPCl<sub>2</sub> (1 equiv., 5.47 mmol) are added to a solution of 2.2 g **1**[OTf] (1 equiv., 5.47 mmol) in 20 mL C<sub>6</sub>H<sub>5</sub>F. The colorless solution is stirred overnight at 90°C. Addition of 20 mL *n*-hexane leads to a colorless oil. The supernatant solution is decanted off and the oil is washed with *n*-hexane, resulting in the formation of a colorless solid. After filtration, washing with *n*-hexane and subsequent drying *in vacuo*, the product is obtained as a white powder. Suitable crystals for X-ray diffraction analysis can be obtained by diffusion of *n*-pentane into a saturated CH<sub>2</sub>Cl<sub>2</sub> solution at -30°C.

Suitable crystals for X-ray diffraction analysis can be obtained by diffusion of *n*-pentane into a saturated CH<sub>2</sub>Cl<sub>2</sub> solution at -30°C.

**Yield:** 1.9 g (74%); **m.p.** 67 °C (dec.); **Raman** (100 mW, 200 scans, 298 K, [cm<sup>-1</sup>]): 3060 (40), 2990 (50), 2946 (74), 2878 (25), 1613 (49), 1585 (64), 1574 (25), 1449 (49), 1401 (46), 1364 (32), 1273 (100), 1094 (31), 1032 (91), 997 (57), 753 (40), 500 (65), 347 (42), 312 (47), 276 (53), 169 (43); **IR** (ATR, 298 K, [cm<sup>-1</sup>]): 2979 (vw), 2942 (vw), 1612 (vw), 1462 (vw), 1435 (vw), 1401 (vw), 1378 (vw), 1262 (vw), 1221 (vw), 1140 (vw), 1113 (vw), 1091 (vw), 1070 (vw), 1029 (vw), 747 (vw), 700 (vw), 634 (vw); **<sup>1</sup>H NMR** (CD<sub>3</sub>CN, 298 K, in ppm) δ = 1.28 (6H, s(br), H5), 1.60 (6H, m, H5), 1.80 (2H, m, H4), 2.37 (6H, s, H3), 7.58 (5H, m, Ar-H); **<sup>13</sup>C{<sup>1</sup>H} NMR** (CD<sub>3</sub>CN, 298 K, in ppm): δ = 11.03 (2C, s, C3), 21.81 (2C, s(br), C5), 26.34 (2C, s, C5), 54.21 (2C, d, <sup>3</sup>J(CP) = 10 Hz, C4), 68.39 (2C, s, C2), 124.59 (1C, q, <sup>1</sup>J(CF) = -320 Hz, OTf), 130.36 (1C, d, <sup>1</sup>J(CP) = 20 Hz, C6), 130.79 (2C, d, <sup>2</sup>J(CP) = 4 Hz, C7), 132.22 (2C, d, <sup>3</sup>J(CP) = 2 Hz, C8), 132.61 (1C, s, C9), 134.16 (1C, s(br), C1); **<sup>19</sup>F{<sup>1</sup>H} NMR** (CD<sub>3</sub>CN, 298 K, in ppm): δ = -75.82 (s); **<sup>31</sup>P{<sup>1</sup>H} NMR** (CD<sub>3</sub>CN, 298 K, in ppm): δ(P) = 48.8 br. s.; **elemental analysis:** calculated for C<sub>18</sub>H<sub>25</sub>ClF<sub>3</sub>N<sub>2</sub>O<sub>3</sub>PS: N 5.92, C 45.72, H 5.33, S 6.78; found: N 5.81, C 46.08, H 5.138, S 6.904.

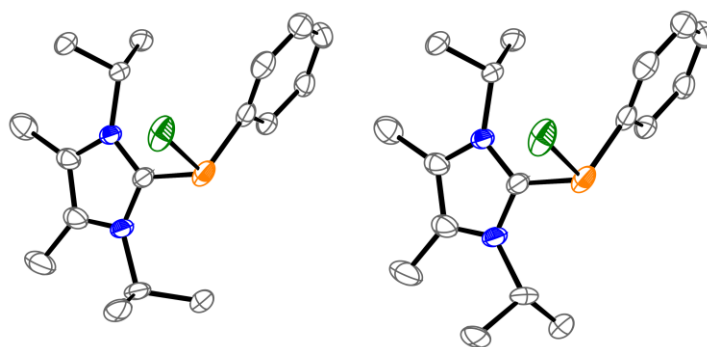

**Figure S6:** Molecular structure of cation **2b**<sup>+</sup> in **2b**[OTf]·C<sub>6</sub>H<sub>5</sub>F (hydrogen atoms, solvate molecules, and anions are omitted for clarity and ellipsoids are set at 50% probability). Herein the two conformers of the molecule are highlighted, which are present in the molecular structure as positional disorder.

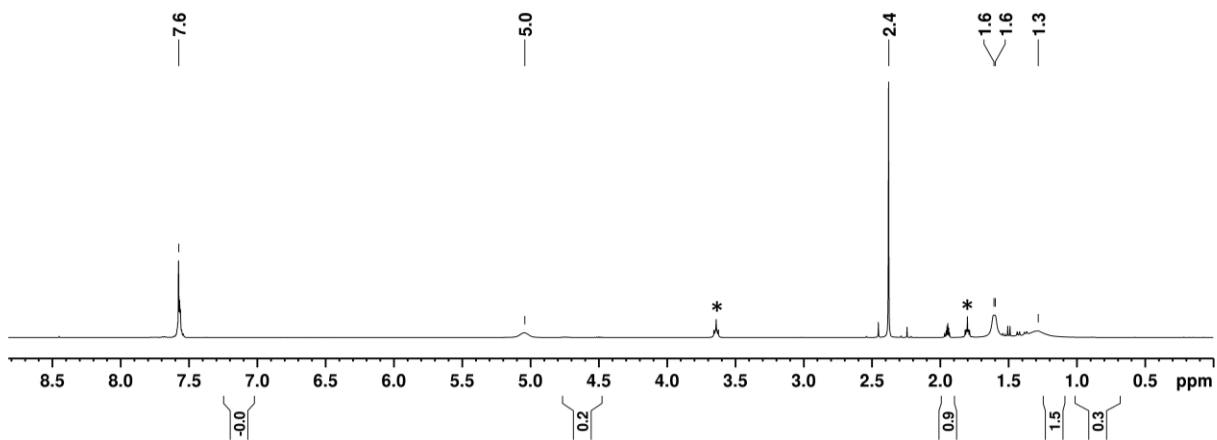

Figure S7:  $^1\text{H}$  NMR-spectrum of **2b**[OTf] in  $\text{CD}_3\text{CN}$  at 300 K.

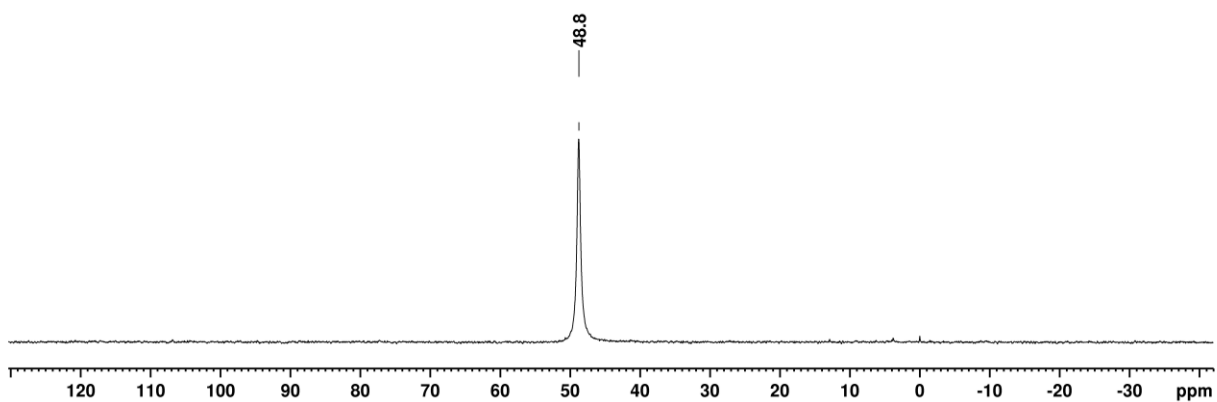

Figure S8:  $^{31}\text{P}\{^1\text{H}\}$  NMR-spectrum of **2b**[OTf] in  $\text{CD}_3\text{CN}$  at 300 K

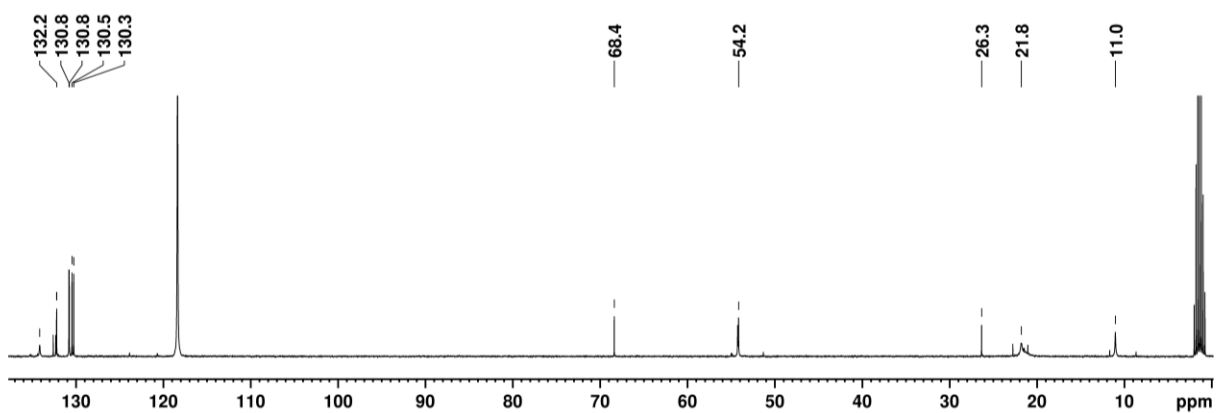

Figure S9:  $^{13}\text{C}\{^1\text{H}\}$  NMR-spectrum of **2b**[OTf] in  $\text{CD}_3\text{CN}$  at 300 K

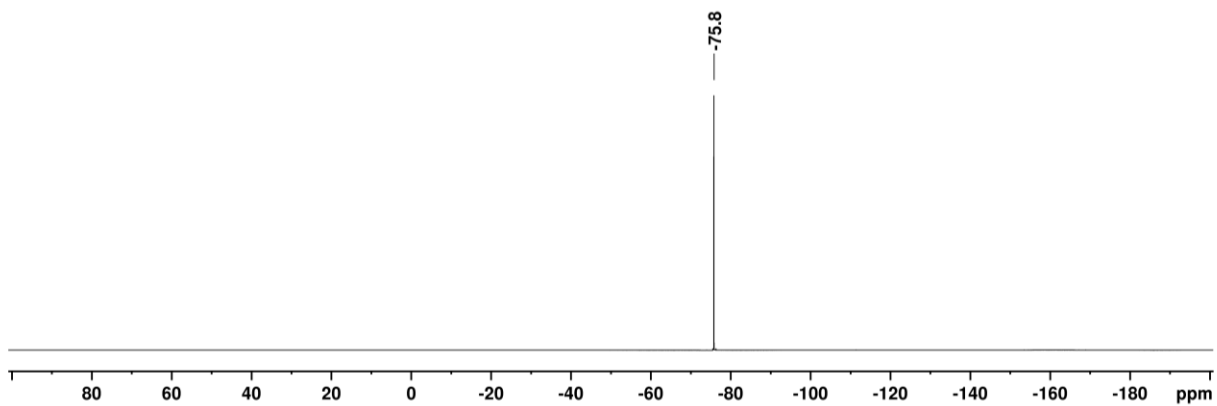

**Figure S10:**  $^{19}\text{F}$  NMR-spectrum of **2b**[OTf] in  $\text{CD}_3\text{CN}$  at 300 K

### 2.1.3. Variable Temperature NMR Studies

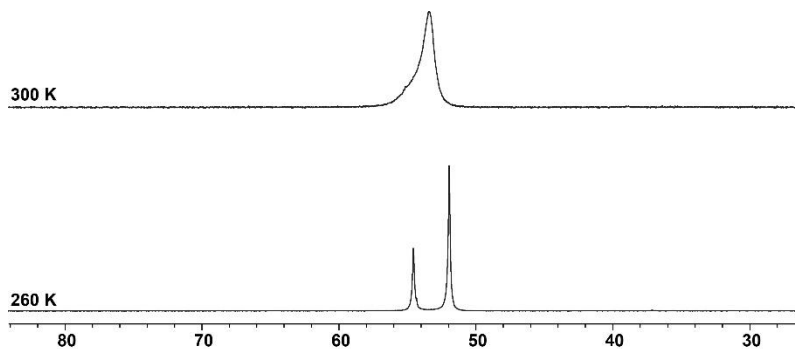

**Figure S11:**  $^{31}\text{P}\{^1\text{H}\}$  NMR-spectra of **2a**[OTf] in  $\text{CD}_2\text{Cl}_2$  at 300 K (top) and 260 K (bottom).

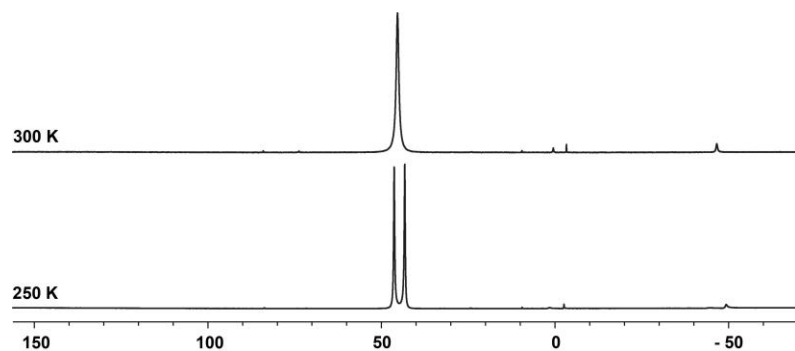

**Figure S12:**  $^{31}\text{P}\{^1\text{H}\}$  NMR-spectra of **2b**[OTf] in  $\text{CD}_2\text{Cl}_2$  at 300 K (top) and 250 K (bottom).

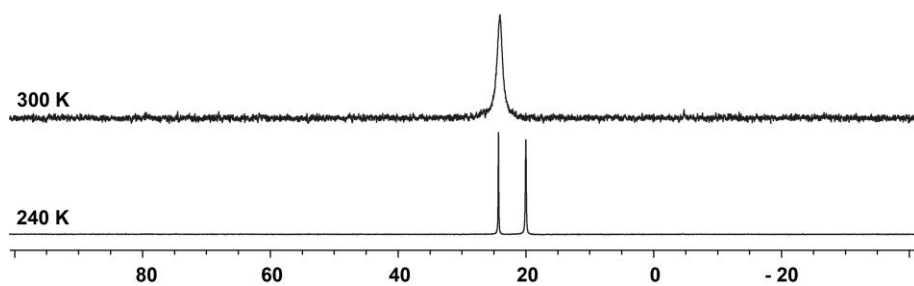

**Figure S13:**  $^{31}\text{P}\{^1\text{H}\}$  NMR-spectra of **2c**[OTf] in  $\text{CD}_2\text{Cl}_2$  at 300 K (top) and 240 K (bottom).

## 2.2. Synthesis of Imidazoliumyl-substituted Diphosphane Salts 5a-c[OTf]<sub>2</sub>

### 2.2.1. Preparation of [(L<sub>C</sub>PCy)<sub>2</sub>][OTf]<sub>2</sub> (5a[OTf]<sub>2</sub>)

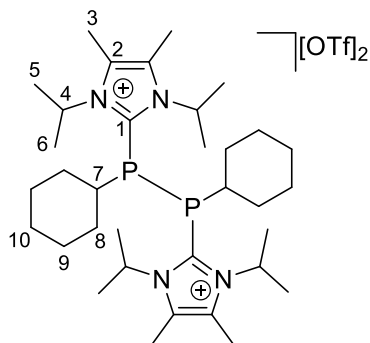

A solution of 60 mg (Me<sub>3</sub>Si)<sub>2</sub>Pyrazine **4** (0.5 equiv., 0.27 mmol) in 2 mL fluorobenzene is dropwise added to a solution of 250 mg L<sub>C</sub>P(Cy)Cl[OTf] **2a**[OTf] (1 equiv., 0.52 mmol) in 2 mL C<sub>6</sub>H<sub>5</sub>F. The color changes immediately to red. After 3 h stirring at room temperature first yellow precipitate is observed. After 16 h the orange suspension is filtered and the precipitate washed with 3x1 mL C<sub>6</sub>H<sub>5</sub>F, 1x1 mL *o*-C<sub>6</sub>H<sub>4</sub>F<sub>2</sub> and *n*-pentane. Drying *in vacuo* affords the product as a light-yellow powder. Suitable crystals for X-ray diffraction analysis can be obtained by diffusion of Et<sub>2</sub>O into

a saturated CH<sub>3</sub>CN solution at -30°C.

**Yield:** 143 mg (63%); **m.p.** 310.0°C (dec.); **Raman** (100 mW, 500 scans, 298 K, [cm<sup>-1</sup>]): 2989 (41), 2938 (88), 2856 (40), 1611 (37), 1447 (37), 1410 (41), 1390 (19), 1356 (63), 1300 (16), 1277 (100), 1152 (18), 1033 (48), 886 (16), 792 (16), 753 (21), 742 (18), 505 (35), 348 (20), 312 (20), 170 (24); **IR** (ATR, 298 K, [cm<sup>-1</sup>]): 2933 (vw), 2855 (vw), 1612 (vw), 1453 (vw), 1395 (w), 1377 (vw), 1263 (vs), 1221 (m), 1171 (vw), 1140 (vs), 1110 (w), 1084 (vw), 1031 (vs), 1000 (vw), 955 (w), 902 (vw), 752 (w), 635 (vs); **<sup>1</sup>H NMR** (CD<sub>3</sub>CN, 300 K, in ppm) δ = 0.43 (2H, br, H8), 1.00 (2H, br, H8), 1.12 - 1.31 (10H, m, H8/9), 1.53 - 1.72 (18H, m, H9/H10), 1.66 (6H, d, <sup>3</sup>J(HH) = 7.0 Hz, H6) 1.77 (6H, d, <sup>3</sup>J(HH) = 6.9 Hz, H5), 2.39 (6H, br, H3), 2.44 (6H, s, H3), 2.55 - 2.64 (2H, m, H7), 5.46 (2H, br, H4), 5.70 (2H, br, H4); **<sup>13</sup>C{<sup>1</sup>H} NMR** (CD<sub>3</sub>CN, 300 K, in ppm): δ = 11.46 (4C, br. s, C3), 21.30 (4C, br. s, C5), 22.23 (4C, s, C6), 25.90 (2C, s, C10), 26.68 - 27.12 (4C, m, C9), 31.47 - 31.94 (4C, m, C8), 37.63 (2C, br. s., C7), 54.39 - 54.62 (2C, ps. t, C4), 54.92 (2C, br., C4), 122.22 (2C, q, <sup>1</sup>J(CF) = -321 Hz, OTf), 134.80 (4C, br. s, C2), 137.80 (2C, br, C1); **<sup>19</sup>F{<sup>1</sup>H} NMR** (CD<sub>3</sub>CN, 300 K, in ppm): δ = -79.17 (s); **<sup>31</sup>P{<sup>1</sup>H} NMR** (CD<sub>3</sub>CN, 300 K, in ppm): δ(P) = -50.0 to -38.4 br.; **elemental analysis:** calculated for C<sub>36</sub>H<sub>62</sub>F<sub>6</sub>N<sub>4</sub>O<sub>6</sub>P<sub>2</sub>S<sub>2</sub>: N 6.32, C 48.75, H 7.05, S 7.23; found: N 6.30, C 48.74, H 7.013, S 7.665.

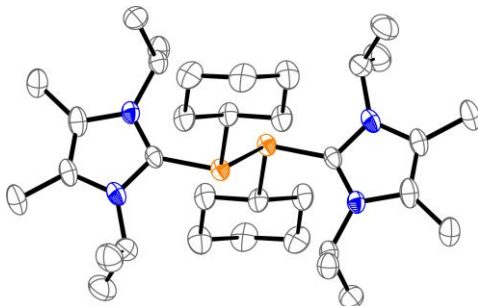

**Figure S14:** Molecular structure of cation **5a**<sup>2+</sup> in **5a**[OTf]<sub>2</sub>·2 CH<sub>2</sub>Cl<sub>2</sub> (hydrogen atoms, solvate molecules, and anions are omitted for clarity and ellipsoids are set at 50% probability).

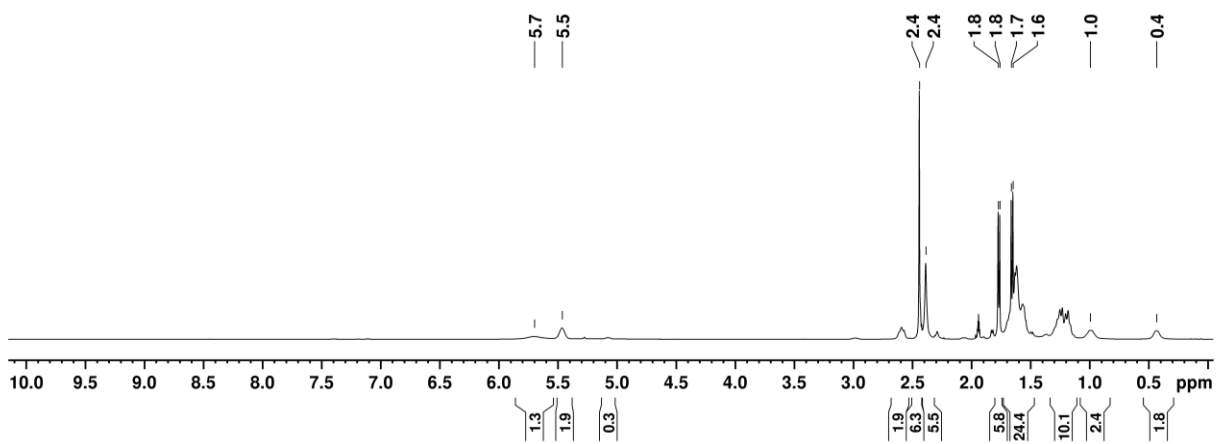

Figure S15:  $^1\text{H}$  NMR-spectrum of  $5\text{a}[\text{OTf}]_2$  in  $\text{CD}_3\text{CN}$  at 300 K.

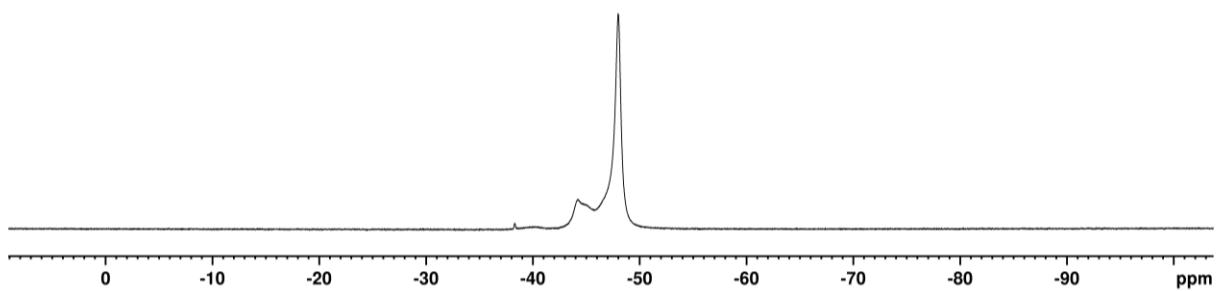

Figure S16:  $^{31}\text{P}\{^1\text{H}\}$  NMR-spectrum of  $5\text{a}[\text{OTf}]_2$  in  $\text{CD}_3\text{CN}$  at 300 K.

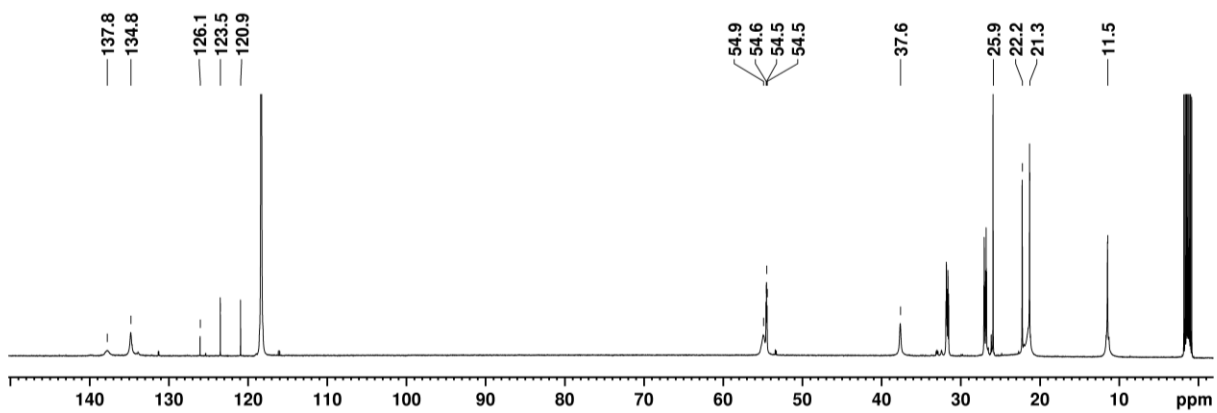

Figure S17:  $^{13}\text{C}\{^1\text{H}\}$  NMR-spectrum of  $5\text{a}[\text{OTf}]_2$  in  $\text{CD}_3\text{CN}$  at 300 K.

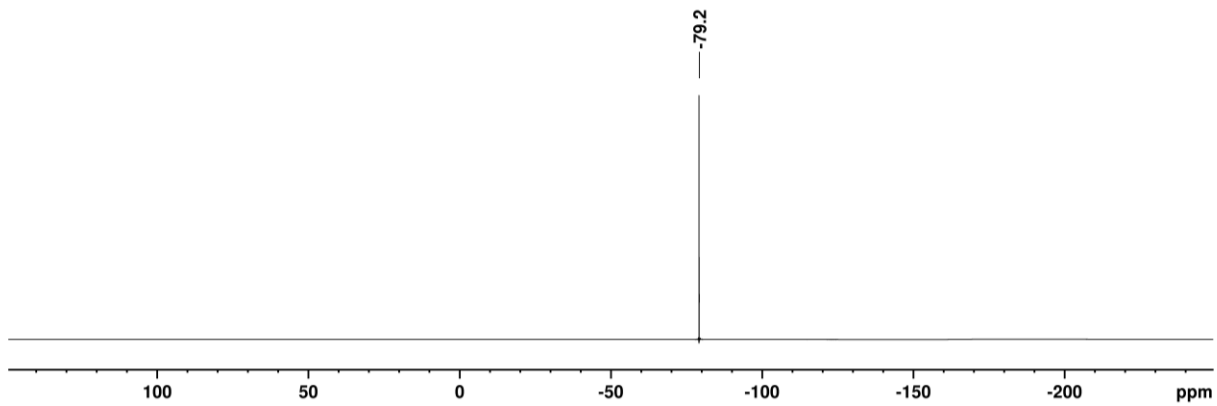

**Figure S18:**  $^{19}\text{F}$  NMR-spectrum of **5a**[OTf]<sub>2</sub> in CD<sub>3</sub>CN at 300 K.

## 2.2.2. Preparation of [(LcPPh)<sub>2</sub>][OTf]<sub>2</sub> (**5b**[OTf]<sub>2</sub>)

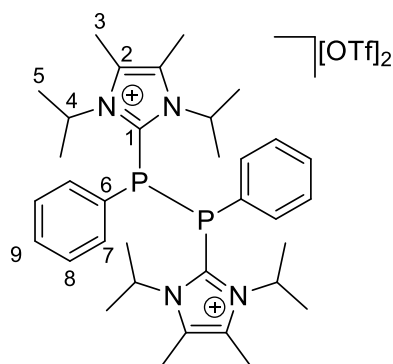

A solution of 72 mg (Me<sub>3</sub>Si)<sub>2</sub>Pyrazine **4** (0.5 equiv., 0.32 mmol) in 2 mL C<sub>6</sub>H<sub>5</sub>F is dropwise added to a solution of 300 mg LcP(Ph)Cl[OTf] **2b**[OTf] (1 equiv., 0.52 mmol) in 2 mL fluorobenzene at -30 °C. The color changes immediately from brown to yellow. After 3 h stirring at room temperature first colorless precipitate is observed. After 4 d the suspension is filtered, and the precipitate washed with 3x1 mL C<sub>6</sub>H<sub>5</sub>F and *n*-pentane. Drying *in vacuo* affords the product as a colorless powder. Suitable crystals for X-ray diffraction analysis can be

obtained by diffusion of *n*-pentane into a saturated CH<sub>2</sub>Cl<sub>2</sub> solution at -30°C.

**Yield:** 215 mg (78%); **m.p.** 291°C (dec.); **Raman** (90 mW, 100 scans, 298 K, [cm<sup>-1</sup>]): 3061 (31), 2980 (40), 2938 (70), 1613 (48), 1584 (78), 1446 (43), 1391 (46), 1272 (100), 1091 (40), 1078 (36), 1032 (70), 1025 (61), 998 (61), 887 (30), 791 (28), 753 (33), 708 (28), 573 (30), 532 (31), 505 (52), 494 (39), 473 (33), 415 (39), 348 (34), 312 (37), 247 (33), 214 (34); **IR** (ATR, 298 K, [cm<sup>-1</sup>]): 2977 (vw), 2938 (vw), 1612 (vw), 1458 (vw), 1437 (vw), 1401 (vw), 1389 (vw), 1373 (vw), 1264 (vs), 1223 (w), 1143 (m), 1111 (w), 1090 (w), 1031 (s), 749 (m), 703 (w), 636 (s); **<sup>1</sup>H NMR** (CD<sub>3</sub>CN, 300K, in ppm) δ = 1.34 (12H, d, <sup>3</sup>J(HH) = 6.60 Hz, H5), 1.54 (12H, d, <sup>3</sup>J(HH) = 6.96 Hz, H5), 2.41 (12H, s, H3), 5.47 (4H, m, H4), 7.50 (10H, m, Ar-H); **<sup>13</sup>C{<sup>1</sup>H} NMR** (CD<sub>3</sub>CN, 300K, in ppm): δ = 11.56 (4C, s, C3), 21.05 (4C, s(br), C5), 22.23 (4C, s, C5), 55.42 (4C, ps. t, <sup>3</sup>J(CP) = 12 Hz, C4), 122.16 (2C, q, <sup>1</sup>J(CF) = -321 Hz, OTf), 127.91 (2C, s(br), C6), 131.46 (4C, ps. t, <sup>3</sup>J(CP) = 3 Hz, C8), 132.42 (2C, s, C9), 133.06 (4C, ps. t, <sup>3</sup>J(CP) = 11 Hz, C7), 135.44 (2C, s(br), C1); **<sup>19</sup>F{<sup>1</sup>H} NMR** (CD<sub>3</sub>CN, 300K, in ppm): δ = -79.22 (s); **<sup>31</sup>P{<sup>1</sup>H} NMR** (CD<sub>3</sub>CN, 300K, in ppm): δ(P) = -47.9.; **elemental analysis:** calculated for C<sub>36</sub>H<sub>50</sub>F<sub>6</sub>N<sub>4</sub>O<sub>6</sub>P<sub>2</sub>S<sub>2</sub>: N 6.40, C 49.42, H 5.76, S 7.33; found: N 6.42, C 49.53, H 5.49, S 7.11.

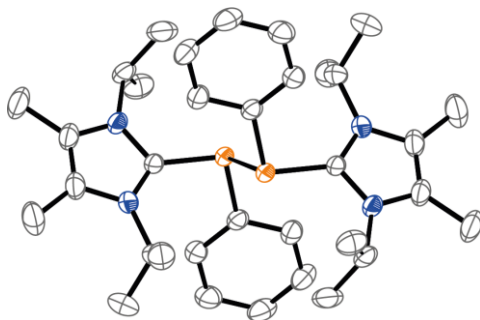

**Figure S19:** Molecular structure of cation **5b**<sup>2+</sup> in **5b**[OTf]<sub>2</sub> (hydrogen atoms, solvate molecules, and anions are omitted for clarity and ellipsoids are set at 50% probability).

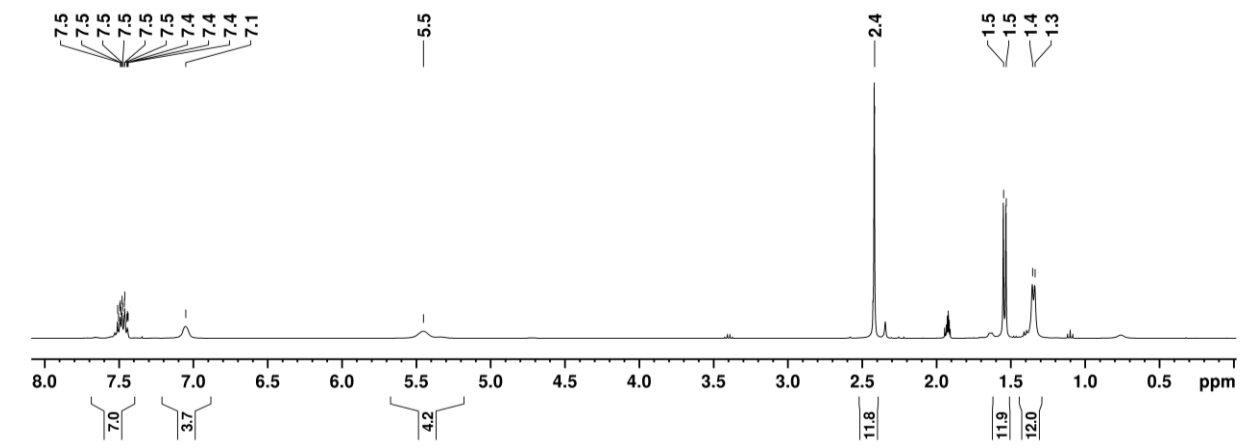

Figure S20:  $^1\text{H}$  NMR-spectrum of  $5\text{b}[\text{OTf}]_2$  in  $\text{CD}_3\text{CN}$  at 300 K.

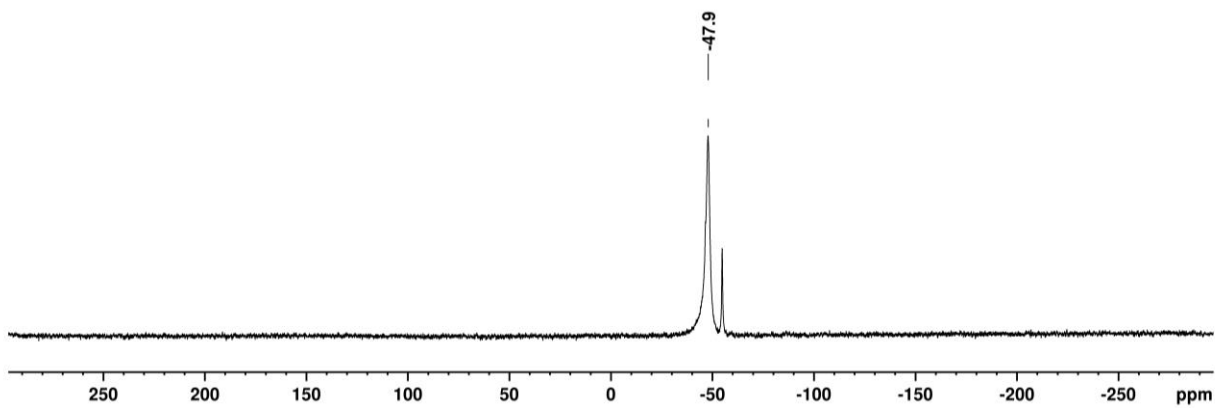

Figure S21:  $^{31}\text{P}$  NMR-spectrum of  $5\text{b}[\text{OTf}]_2$  in  $\text{CD}_3\text{CN}$  at 300 K.

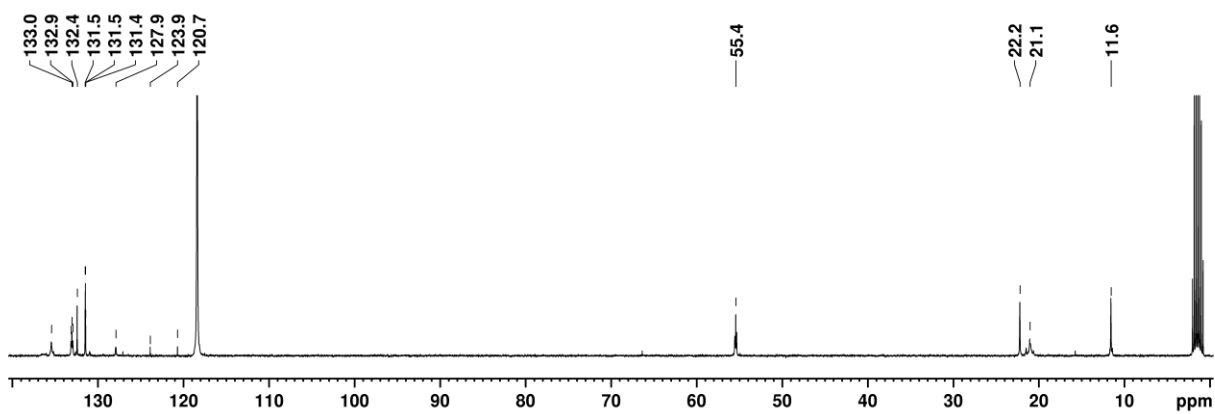

Figure S22:  $^{13}\text{C}\{^1\text{H}\}$  NMR-spectrum of  $5\text{b}[\text{OTf}]_2$  in  $\text{CD}_3\text{CN}$  at 300 K.

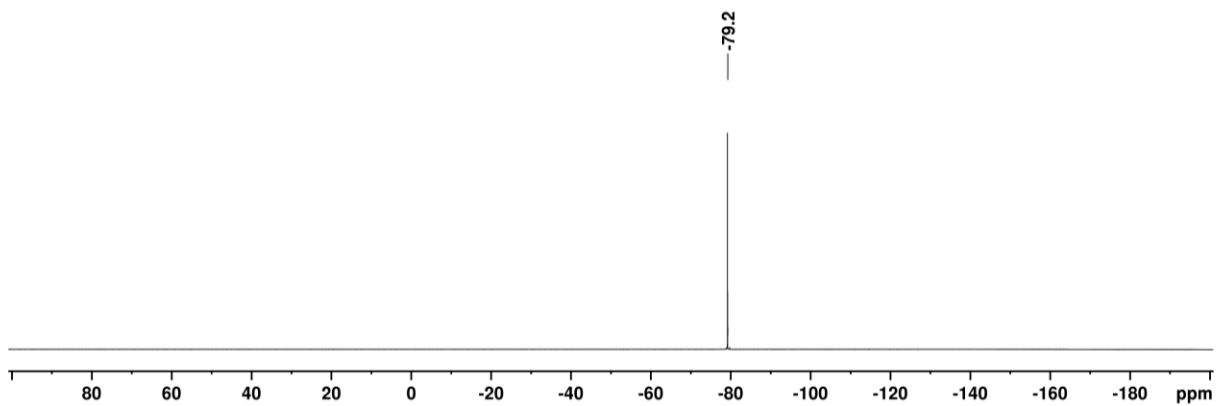

**Figure S23:**  $^{19}\text{F}$  NMR-spectrum of **5b**[OTf]<sub>2</sub> in CD<sub>3</sub>CN at 300 K.

### 2.2.3. Preparation of [(LcPPy)<sub>2</sub>][OTf]<sub>2</sub> (**5c**[OTf]<sub>2</sub>)

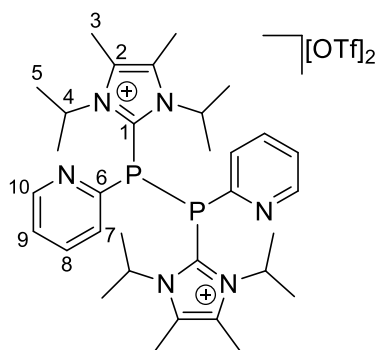

A solution of 120 mg (Me<sub>3</sub>Si)<sub>2</sub>Pyrazine **4** (0.5 equiv., 0.53 mmol) in 3 mL C<sub>6</sub>H<sub>5</sub>F is dropwise added to a solution of 500 mg LcP(Py)Cl[OTf] **2c**[OTf] (1 equiv., 1.06 mmol) in 5 mL C<sub>6</sub>H<sub>5</sub>F at -30 °C. The color changes immediately from brown to yellow. After 3 h stirring at room temperature first colorless precipitate is observed. After 16 h the suspension is filtered and the precipitate washed with 3x1 mL C<sub>6</sub>H<sub>5</sub>F and *n*-pentane. Drying *in vacuo* affords the product as a colorless powder. Suitable crystals for X-ray diffraction analysis can be obtained by diffusion of *n*-pentane

into a saturated CH<sub>2</sub>Cl<sub>2</sub> solution at -30°C.

**Yield:** 402 mg (87%); **m.p.** 269°C (dec.); **Raman** (100 mW, 500 scans, 298 K, [cm<sup>-1</sup>]): 3054 (16), 2981 (32), 2939 (49), 1618 (31), 1573 (34), 1561 (35), 1453 (32), 1401 (38), 1280 (100), 1125 (34), 1045 (36), 1031 (57), 987 (74), 889 (21), 795 (19), 753 (26), 717 (17), 574 (19), 535 (21), 508 (50), 476 (19), 415 (22), 312 (29), 252 (26), 210 (27); **IR** (ATR, 298 K, [cm<sup>-1</sup>]): 3046 (vw), 2979 (vw), 2938 (vw), 1616 (vw), 1571 (vw), 1560 (vw), 1450 (w), 1422 (w), 1400 (w), 1378 (w), 1262 (vs), 1223 (m), 1141 (s), 1113 (w), 1090 (w), 1030 (vs), 985 (w), 782 (w), 762 (w), 753 (w), 636 (vs); **<sup>1</sup>H NMR** (CD<sub>3</sub>CN, 300K, in ppm) δ = 1.39 (12H, s(br), H5), 1.59 (12H, s(br), H5), 2.42 (12H, s, H3), 5.61 (4H, s(br), H4), 7.43 (2H, ddd, <sup>3</sup>J(HH) = 7.70 Hz, <sup>3</sup>J(HH) = 7.70 Hz, <sup>4</sup>J(HH) = 2.00 Hz, H9), 7.47 (2H, m, H7), 7.81 (2H, qt, <sup>3</sup>J(HH) = 7.70 Hz, <sup>4</sup>J(HH) = 2.00 Hz, H10), 8.55 (2H, d, <sup>3</sup>J(HH) = 4.64 Hz, H8); **<sup>13</sup>C{<sup>1</sup>H} NMR** (CD<sub>3</sub>CN, 300K, in ppm): δ = 10.25 (2C, s, C3), 21.08 (4C, s(br), C5), 53.97 (2C, s(br), C4), 121.49 (2C, q, <sup>1</sup>J(CF) = -325 Hz, OTf), 124.72 (1C, s, C9), 129.33 (1C, m, C7), 133.02 (2C, s(br), C2), 137.34 (1C, m, C10), 151.08 (1C, m, C8), 155.45 (1C, m, C6), the C1 resonance could not be detected; **<sup>19</sup>F{<sup>1</sup>H} NMR** (CD<sub>3</sub>CN, 300K, in ppm): δ = -79.27 (s); **<sup>31</sup>P{<sup>1</sup>H} NMR** (CD<sub>3</sub>CN, 300K, in ppm): δ(P) = -43.03 br. s.; **elemental analysis:** calculated for C<sub>34</sub>H<sub>48</sub>F<sub>6</sub>N<sub>6</sub>O<sub>6</sub>P<sub>2</sub>S<sub>2</sub>: N 9.58, C 46.57, H 5.52, S 7.31; found: N 9.71, C 46.55, H 5.23, S 7.20.

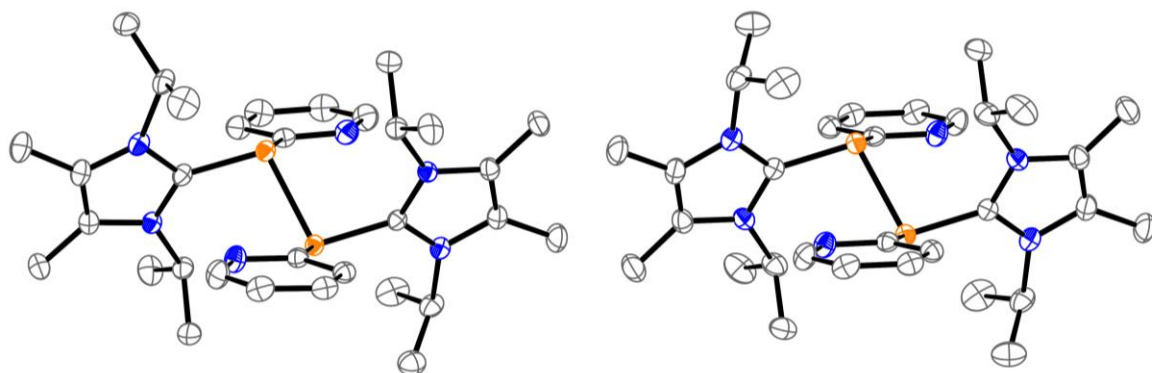

**Figure S24:** Molecular structure of cation **5c**<sup>2+</sup> in **5c**[OTf]<sub>2</sub> (one of two independent molecules of the asymmetric unit is shown; hydrogen atoms, solvate molecules, and anions are omitted for clarity and ellipsoids are set at 50% probability). Herein two of the three possible conformers of the molecule are highlighted, which are present in the molecular structure as positional disorder.

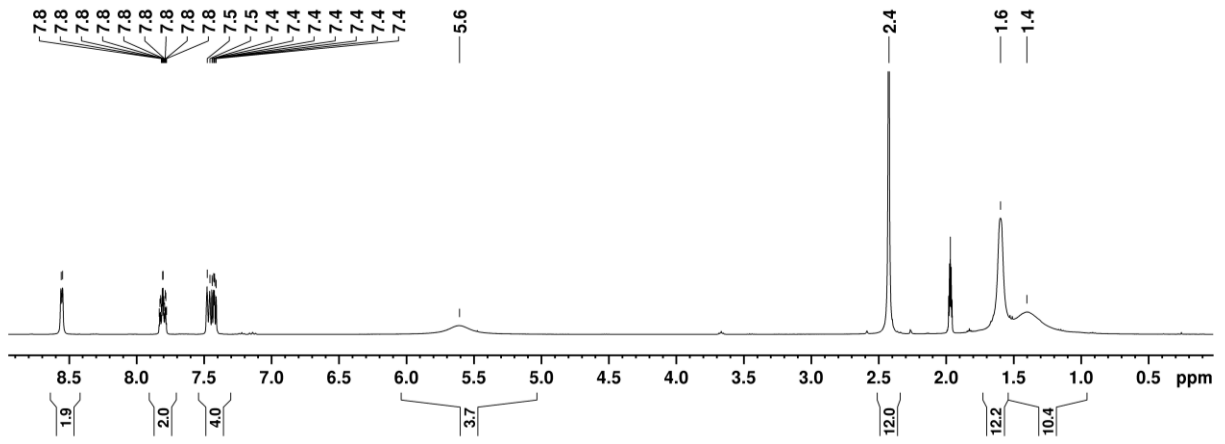

Figure S25:  $^1\text{H}$  NMR-spectrum of  $5\text{c}[\text{OTf}]_2$  in  $\text{CD}_3\text{CN}$  at 300 K.

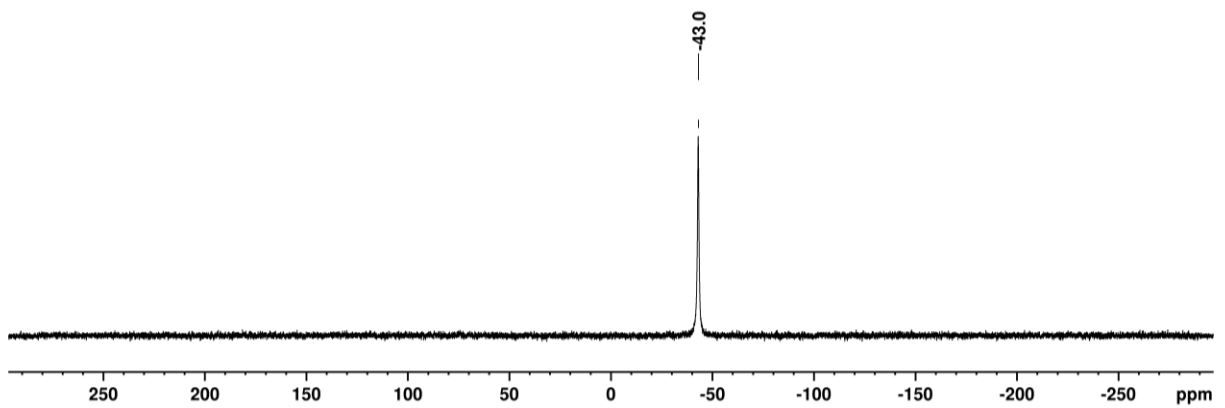

Figure S26:  $^{31}\text{P}$  NMR-spectrum of  $5\text{c}[\text{OTf}]_2$  in  $\text{CD}_3\text{CN}$  at 300 K.

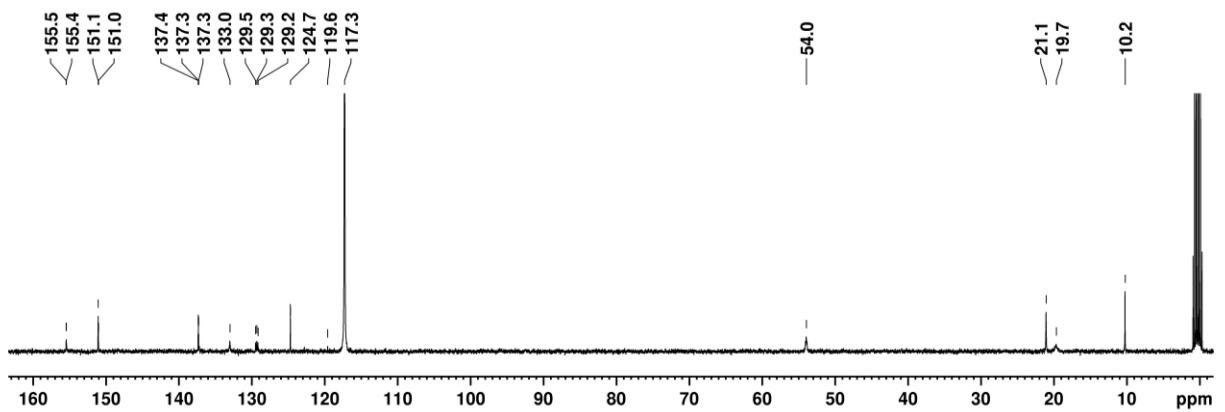

Figure S27:  $^{13}\text{C}\{^1\text{H}\}$  NMR-spectrum of  $5\text{c}[\text{OTf}]_2$  in  $\text{CD}_3\text{CN}$  at 300 K.

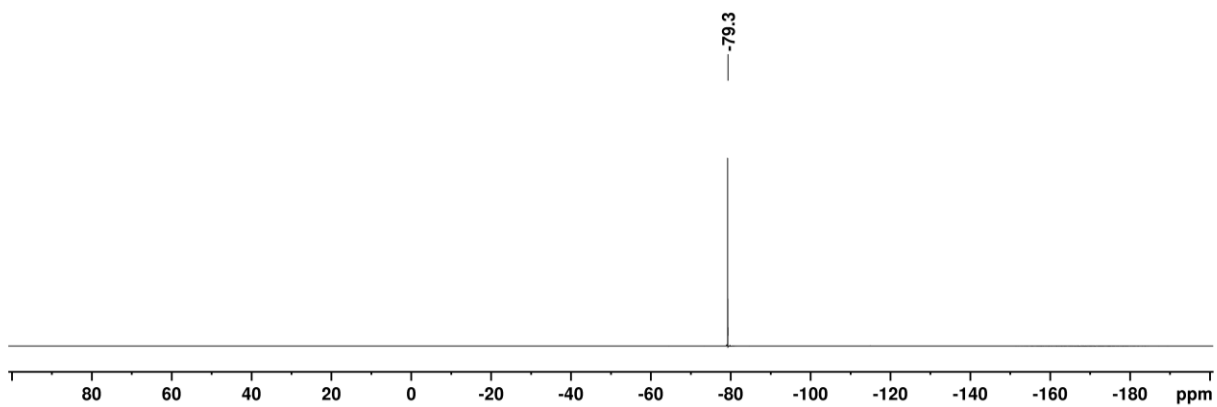

**Figure S28:**  $^{19}\text{F}$  NMR-spectrum of  $5\text{c}[\text{OTf}]_2$  in  $\text{CD}_3\text{CN}$  at 300 K.

## 2.2.4. Variable Temperature NMR Studies

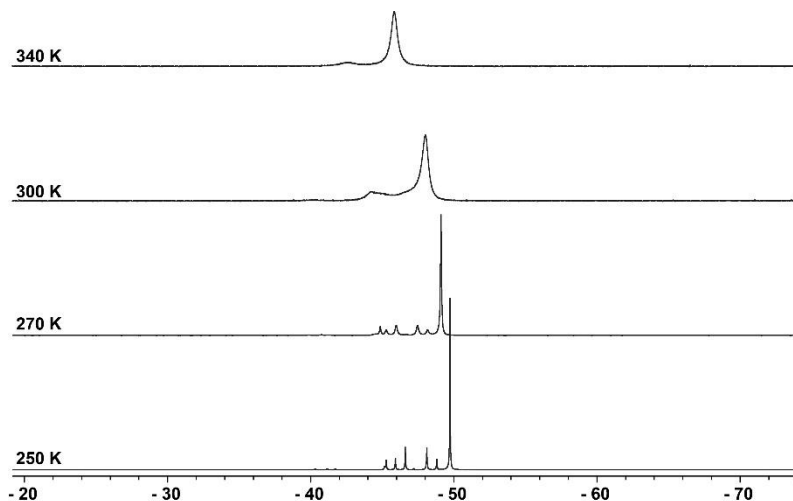

**Figure S29:** Variable temperature  $^{31}\text{P}\{^1\text{H}\}$  NMR-spectra of **5a**[OTf]<sub>2</sub> in CD<sub>3</sub>CN from 250 K to 340 K. Upon cooling to 250 K the broad resonances resolve into two singlet resonances (**5a**[OTf]<sub>2</sub>:  $\delta(\text{P}) = -49.8$  ppm,  $\delta(\text{P}) = -45.3$  ppm) and an AB spin system (**5a**[OTf]<sub>2</sub>: AB spin system  $\delta(\text{P}_\text{A}) = -48.5$  ppm  $\delta(\text{P}_\text{B}) = -46.3$  ppm,  $^1J(\text{PP}) = -140$  Hz).

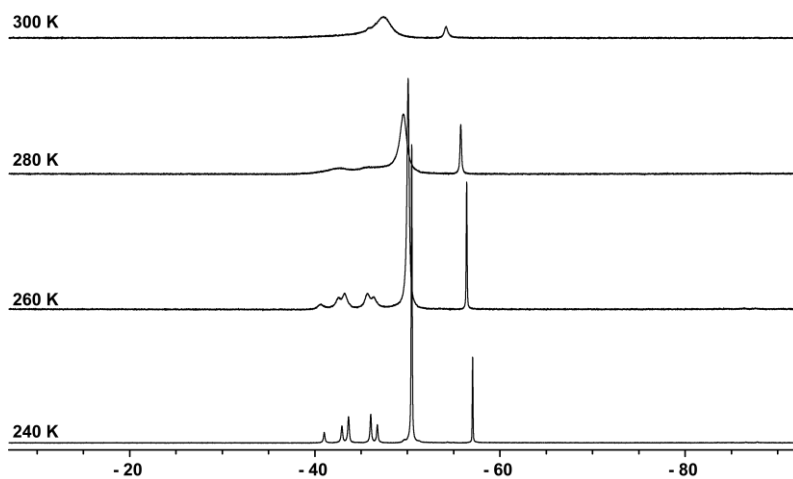

**Figure S30:** Variable temperature  $^{31}\text{P}\{^1\text{H}\}$  NMR-spectra of **5b**[OTf]<sub>2</sub> in CD<sub>3</sub>CN from 250 K to 340 K. Upon cooling to 250 K the broad resonances resolve into three singlet resonances (**5b**[OTf]<sub>2</sub>:  $\delta(\text{P}) = -57.1$  ppm,  $\delta(\text{P}) = -50.5$  ppm,  $\delta(\text{P}) = -41.0$  ppm) and an AB spin system (**5b**[OTf]<sub>2</sub>: AB spin system  $\delta(\text{P}_\text{A}) = -46.4$  ppm  $\delta(\text{P}_\text{B}) = -43.3$  ppm,  $^1J(\text{PP}) = -146$  Hz).

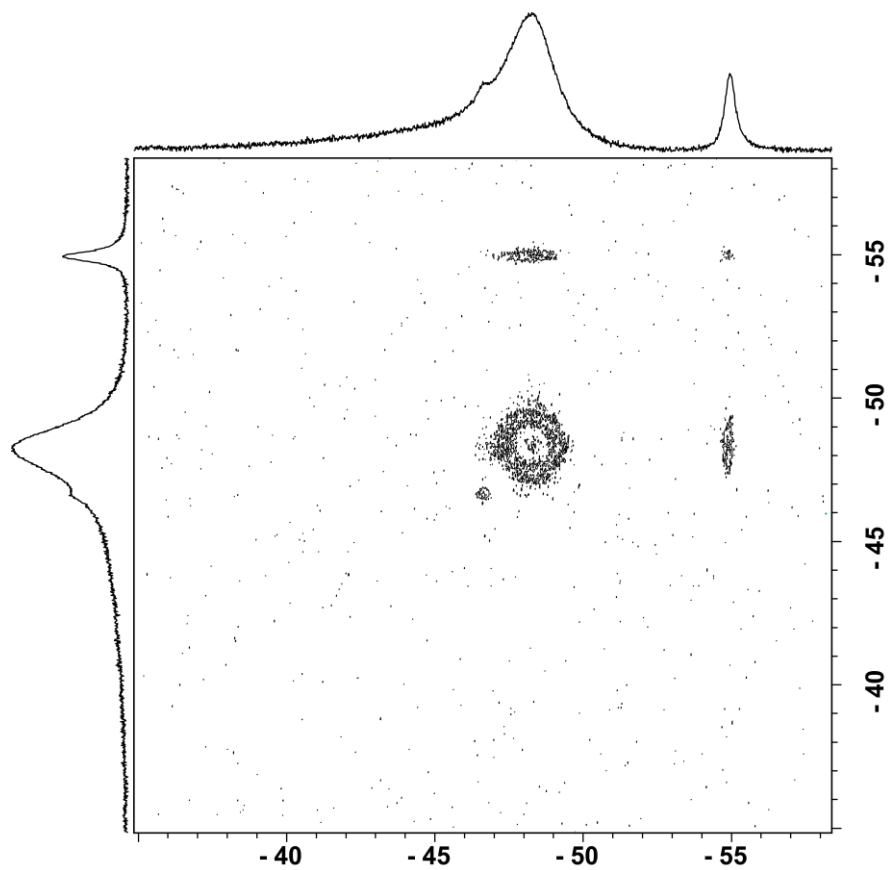

**Figure S31:** <sup>31</sup>P-<sup>31</sup>P-EXSY NMR spectrum of **5b**[OTf]<sub>2</sub> in CD<sub>3</sub>CN at 300 K (mixing time 1 s).

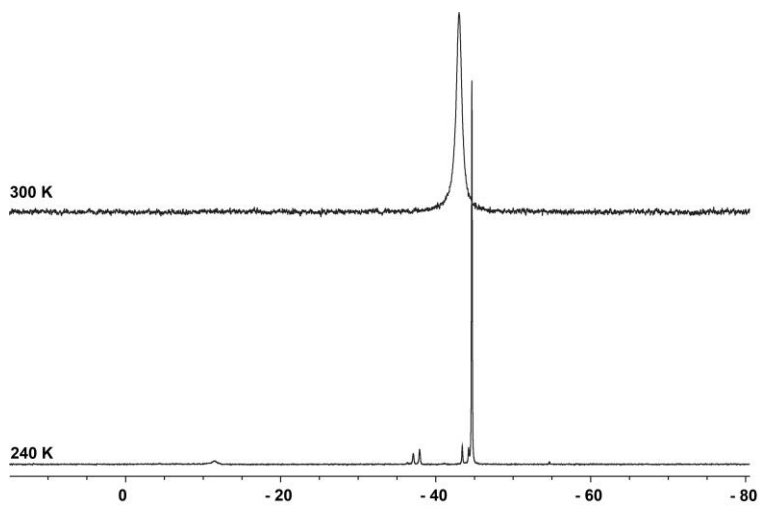

**Figure S32:** Variable temperature <sup>31</sup>P{<sup>1</sup>H} NMR-spectra of **5c**[OTf]<sub>2</sub> in CD<sub>3</sub>CN from 240 K to 300 K

## 2.3. Synthesis of Imidazoliumyl-substituted *iso*-Tetraphosphane Salts **6a,b**[OTf]<sub>3</sub>

### 2.3.1. Preparation of [(L<sub>c</sub>PCy)<sub>3</sub>P][OTf]<sub>3</sub> (**6a**[OTf]<sub>3</sub>)

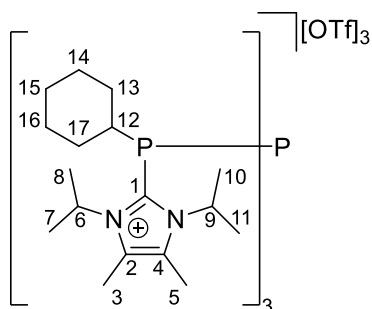

A solution of 305 mg P(SiMe<sub>3</sub>)<sub>3</sub> (0.53 equiv., 1.22 mmol) in 1.5 mL C<sub>6</sub>H<sub>5</sub>F is dropwise added to a solution of 1.1 g L<sub>c</sub>P(Cy)Cl[OTf] **2a**[OTf] (1 equiv., 2.30 mmol) in 1.5 mL C<sub>6</sub>H<sub>5</sub>F. The color changes immediately to red. After 3 h stirring at room temperature first precipitate is observed. After 3 d the orange suspension is filtered and the precipitate washed with 3x1 mL C<sub>6</sub>H<sub>5</sub>F, 2x1 mL *o*-C<sub>6</sub>H<sub>4</sub>F<sub>2</sub> and *n*-pentane. Drying under vacuum affords the product as a white powder. Suitable crystals for X-ray diffraction analysis can be obtained by diffusion of Et<sub>2</sub>O into a saturated CH<sub>3</sub>CN solution at -30°C.

**Yield:** 670 mg (74%); **m.p.** 249.8°C (dec.); **Raman** (100 mW, 100 scans, 298 K, [cm<sup>-1</sup>]): 2992 (27), 2950 (85), 2880 (24), 2855 (31), 1610 (31), 1449 (38), 1404 (43), 1351 (49), 1272 (100), 1149 (19), 1033 (50), 999 (14), 885 (17), 790 (16), 752 (22), 738 (18), 573 (16), 347 (23), **IR** (ATR, 298 K, [cm<sup>-1</sup>]): 2992 (vw), 2929 (w), 2855 (vw), 1608 (vw), 1450 (w), 1392 (w), 1351 (vw), 1260 (vs), 1221 (m), 1138 (s), 1028 (vs), 998 (w), 788 (vw), 752 (w), 635 (vs), **<sup>1</sup>H NMR** (CD<sub>3</sub>CN, 300 K, in ppm) δ = 1.03 (9H, d, <sup>3</sup>J(HH) = 6.7 Hz, H11), 1.20 - 1.27 (3H, m, H17), 1.30 - 1.38 (6H, m, H14/H15), 1.42 (9H, d, <sup>3</sup>J(HH) = 6.1 Hz, H10), 1.47 - 1.52 (6H, m, H16/H17), 1.60 (9H, d, <sup>3</sup>J(HH) = 6.5 Hz, H7), 1.62 - 1.65 (3H, m, H13), 1.71 (9H, d, <sup>3</sup>J(HH) = 6.7 Hz, H8), 1.76 - 1.83 (3H, m, H15), 1.83 - 1.89 (3H, m, H14), 1.94 - 1.95 (3H, m, H16), 2.04 - 2.11 (3H, m, H13), 2.34 (9H, s, H5), 2.46 (9H, s, H3), 2.67 - 2.76 (3H, m, H12), 4.05 (3H, br, H9), 5.83 (3H, br, H6); **<sup>13</sup>C{<sup>1</sup>H} NMR** (CD<sub>3</sub>CN, 300 K, in ppm): δ = 11.43 (3C, s, C5), 11.66 (3C, s, C3), 21.55 (3C, s, C11), 21.94 (3C, s, C7), 22.25 (3C, s, C8), 22.69 (3C, s, C10), 25.88 (3C, s, C15), 26.93 (3C, br, C16), 27.97 (3C, s, C14), 31.24 (3C, s, C17), 33.49 (3C, br, C13), 37.30 (3C, br, C12), 55.20 - 55.84 (6C, m, C6/C9), 122.21 (3C, q, <sup>1</sup>J(CF) = -321 Hz, OTf), 134.64 (3C, s, C4), 135.20 (3C, s, C2), 137.80 (3C, dd, <sup>1</sup>J(CP) = -66 Hz, <sup>2</sup>J(CP) = 23 Hz, C1); **<sup>19</sup>F{<sup>1</sup>H} NMR** (CD<sub>3</sub>CN, 300 K, in ppm): δ = -79.23 (s); **<sup>31</sup>P{<sup>1</sup>H} NMR** (CD<sub>3</sub>CN, 300 K, in ppm): AX<sub>3</sub> spin system δ(P<sub>A</sub>) = -87.4, δ(P<sub>X</sub>) = -57.7, <sup>1</sup>J(PP) = -271 Hz; **elemental analysis:** calculated for C<sub>54</sub>H<sub>93</sub>F<sub>9</sub>N<sub>6</sub>O<sub>9</sub>P<sub>4</sub>S<sub>3</sub>: N 6.17, C 47.64, H 6.84, S 7.06; found: N 6.17, C 47.45, H 6.89, S 7.34.

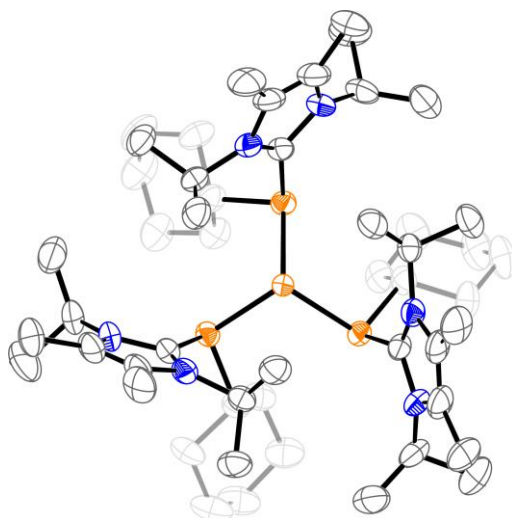

**Figure S33:** Molecular structure of cation  $6a^{3+}$  in  $6a[OTf]_3 \cdot 2 CH_3CN$  (hydrogen atoms, solvate molecules, and anions are omitted for clarity and ellipsoids are set at 50% probability).

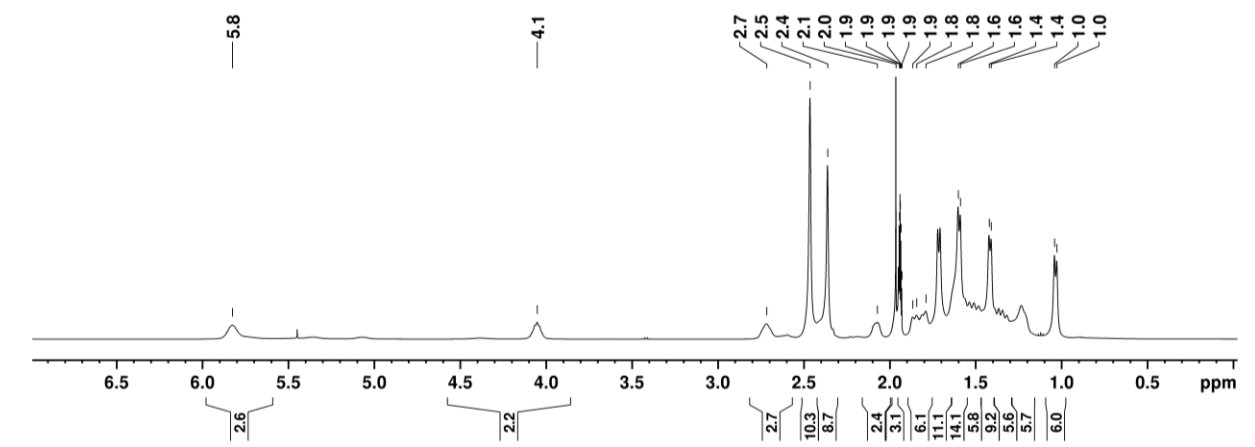

**Figure S34:**  $^1H$  NMR-spectrum of  $6a[OTf]_3$  in  $CD_3CN$  at 300 K.

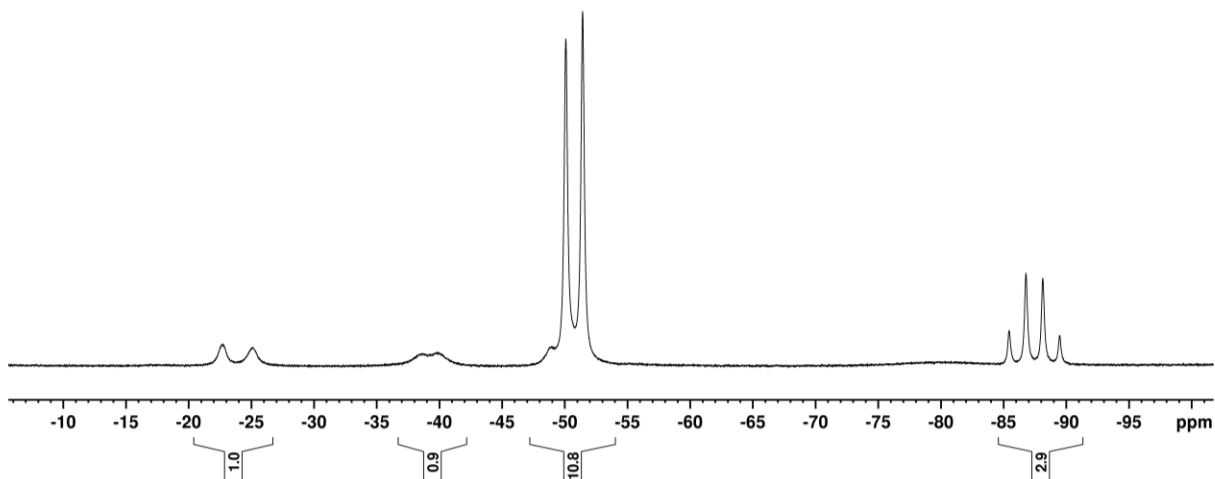

**Figure S35:**  $^{31}P\{^1H\}$  NMR-spectrum of  $6a[OTf]_3$  in  $CD_3CN$  at 300 K.

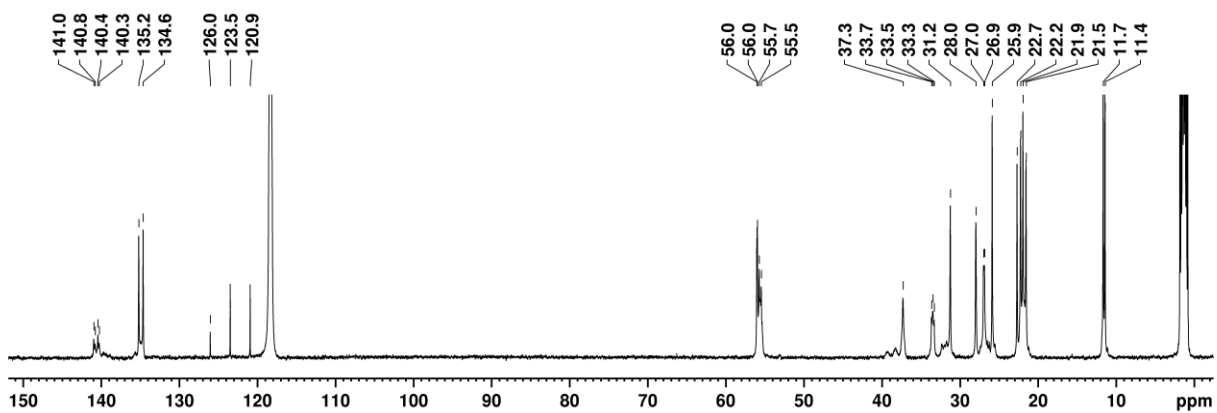

Figure S36:  $^{13}\text{C}\{^1\text{H}\}$  NMR-spectrum of  $6\text{a}[\text{OTf}]_3$  in  $\text{CD}_3\text{CN}$  at 300 K.

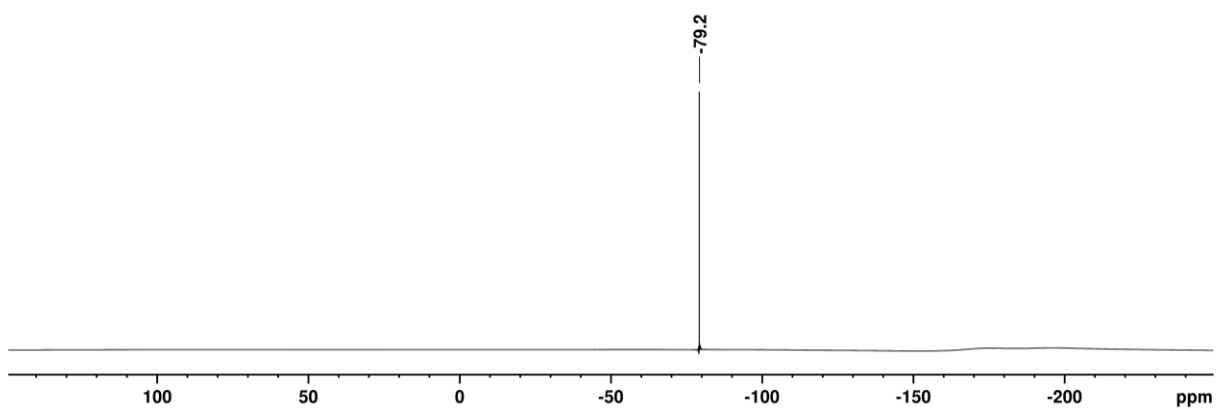

Figure S37:  $^{19}\text{F}$  NMR-spectrum of  $6\text{a}[\text{OTf}]_3$  in  $\text{CD}_3\text{CN}$  at 300 K.

### 2.3.2. Preparation of [(LcPPh)<sub>3</sub>P][OTf]<sub>3</sub> (**6b**[OTf]<sub>3</sub>)

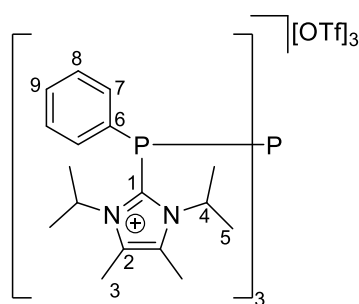

A solution of 1.1 g P(SiMe<sub>3</sub>)<sub>3</sub> (0.6 equiv., 4.39 mmol) in 15 mL C<sub>6</sub>H<sub>5</sub>F is dropwise added to a solution of 3.5 g LcP(Ph)Cl[OTf] **2b**[OTf] (1 equiv., 7.32 mmol) in 5 mL C<sub>6</sub>H<sub>5</sub>F at room temperature. The color changes immediately to red. After stirring at room temperature overnight. The yellow suspension is filtered and the precipitate washed with C<sub>6</sub>H<sub>5</sub>F and *n*-pentane. Drying under vacuum affords the product as a colorless powder. Suitable crystals for X-ray diffraction analysis can be obtained by diffusion of Et<sub>2</sub>O into a saturated CH<sub>2</sub>Cl<sub>2</sub> solution at -30°C.

saturated CH<sub>2</sub>Cl<sub>2</sub> solution at -30°C.

**Yield:** 2.67 g (81 %); **m.p.** 280°C (dec.); **Raman** (80 mW, 200 scans, 298 K, [cm<sup>-1</sup>]): 3059 (19), 2943 (42), 1607 (30), 1583 (40), 1455 (25), 1404 (38), 1350 (38), 1270 (100), 1149 (23), 1085 (21), 1033 (54), 1001 (53), 884 (14), 789 (15), 754 (21), 573 (15), 348 (25), 312 (24), 282 (21); **IR** (ATR, 298 K, [cm<sup>-1</sup>]): 2985 (vw), 1605 (vw), 1435 (vw), 1391 (vw), 1260 (m), 1222 (w), 1142 (w), 1029 (m), 745 (w), 703 (vw), 635 (m); **<sup>1</sup>H NMR** (CD<sub>2</sub>Cl<sub>2</sub>, 300 K, in ppm) δ = 0.25 (6H, s(br), H5), 1.48-2.01 (30H, m, H5), 2.08 (18H, s, H3), 5.22 (3H, s(br), H4), 6.40 (3H, s(br), H4), 7.35-7.60 (9H, m, H8/9), 7.81 (6H, m, H7); **<sup>13</sup>C{<sup>1</sup>H} NMR** (CD<sub>2</sub>Cl<sub>2</sub>, 300 K, in ppm): δ = 10.79 (18C, s(br), C3), 19.77 (3C, s(br), C5), 20.74 (6C, s(br), C5), 22.41 (3C, s(br), C5), 55.48 (3C, s(br), C4), 55.51 (3C, s(br), C4), 56.42 (3C, s, C4), 121.06 (3C, q, <sup>1</sup>J(CF) = -321 Hz, OTf), 129.30 (6C, s, C8), 131.49 (3C, s, C9), 132.71 (3C, s, C2), 133.21 (3C, s, C2), 134.26 (6C, m, C7), 136.50 (3C, d, <sup>1</sup>J(CP) = -49 Hz, C1); **<sup>19</sup>F{<sup>1</sup>H} NMR** (CD<sub>3</sub>CN, 300 K, in ppm): δ = -79.23 (s); **<sup>31</sup>P{<sup>1</sup>H} NMR** (CD<sub>3</sub>CN, 300 K, in ppm): AX<sub>3</sub> spin system δ(P<sub>A</sub>) = -47.9 ppm, δ(P<sub>X</sub>) = -41.8 ppm, <sup>1</sup>J(PP) = -130 Hz; **elemental analysis:** calculated for C<sub>54</sub>H<sub>75</sub>F<sub>9</sub>N<sub>6</sub>O<sub>9</sub>P<sub>4</sub>S<sub>3</sub>: N 6.26, C 48.28, H 5.63, S 7.16; found: N 6.08, C 48.11, H 5.58, S 6.98.

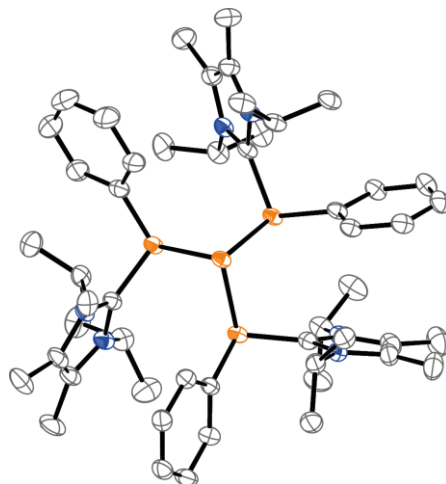

**Figure S38:** Molecular structure of cation **6b**<sup>3+</sup> in **6b**[OTf]<sub>3</sub>·4 CH<sub>2</sub>Cl<sub>2</sub> (hydrogen atoms, solvate molecules, and anions are omitted for clarity and ellipsoids are set at 50% probability).

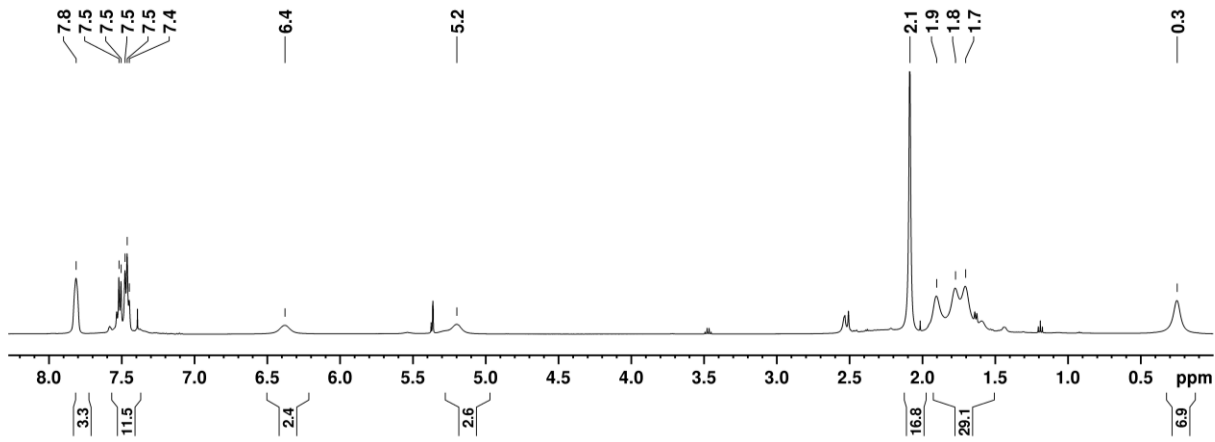

Figure S39:  $^1\text{H}$  NMR-spectrum of **6b**[OTf] $_3$  in  $\text{CD}_2\text{Cl}_2$  at 300 K.

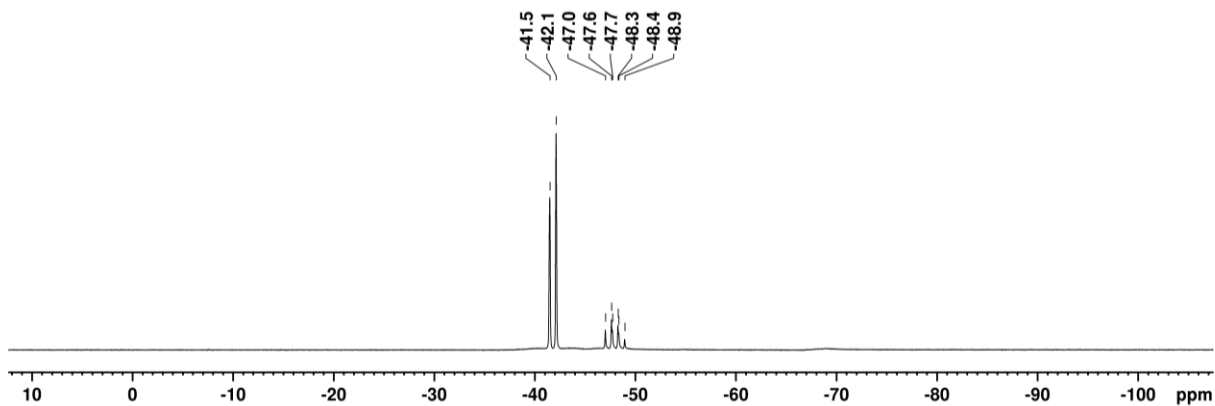

Figure S40:  $^{31}\text{P}$  NMR-spectrum of **6b**[OTf] $_3$  in  $\text{CD}_2\text{Cl}_2$  at 300 K.

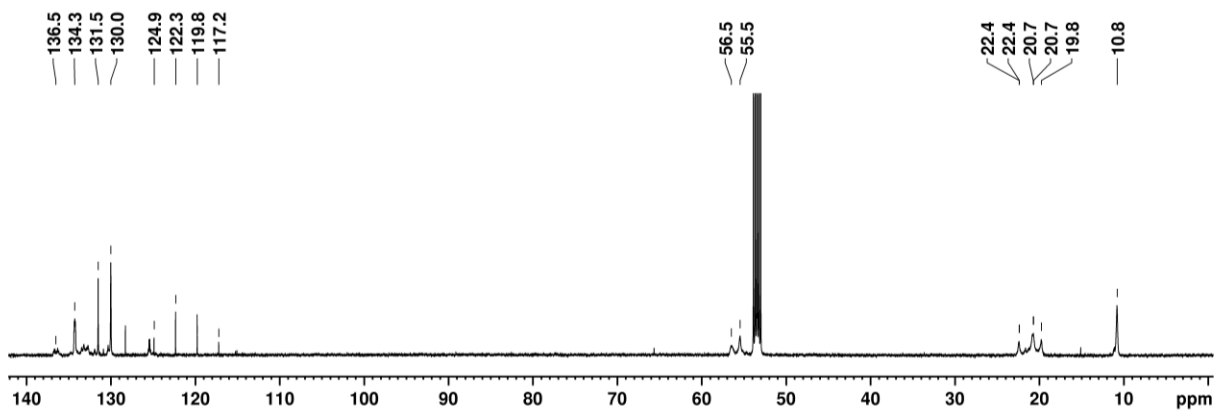

Figure S41:  $^{13}\text{C}\{^1\text{H}\}$  NMR-spectrum of **6b**[OTf] $_3$  in  $\text{CD}_2\text{Cl}_2$  at 300 K.

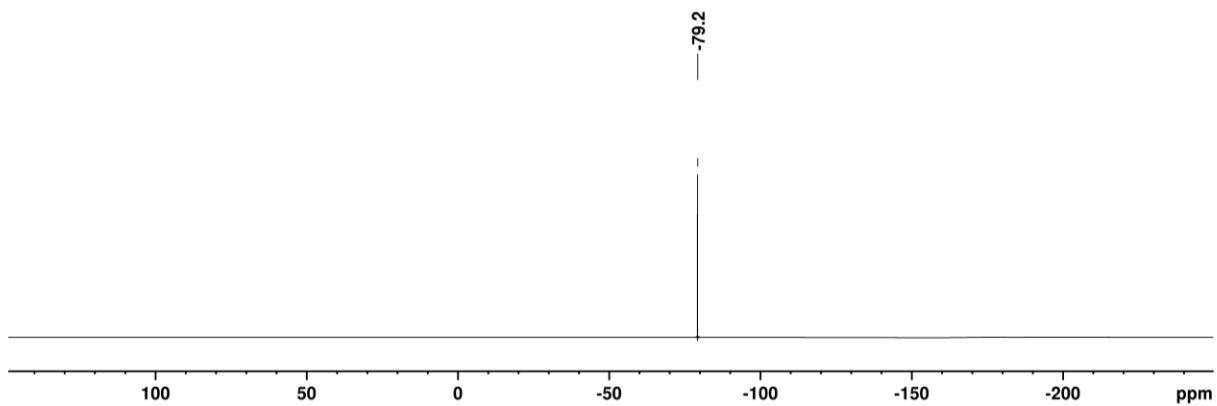

**Figure S42:**  $^1\text{H}$  NMR-spectrum of **6b**[OTf]<sub>3</sub> in  $\text{CD}_2\text{Cl}_2$  at 300 K.

### 2.3.3. Synthesis of crude [(LcPPy)<sub>3</sub>P][OTf]<sub>3</sub> (**6c**[OTf]<sub>3</sub>)

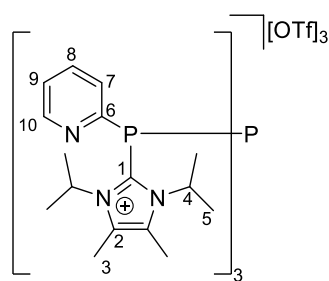

solution.

A solution of 26.5 mg  $\text{P}(\text{SiMe}_3)_3$  (0.5 equiv., 0.11 mmol) in 1.5 mL  $\text{C}_6\text{H}_5\text{F}$  is dropwise added to a solution of 100 mg  $\text{LcP}(\text{Py})\text{Cl}[\text{OTf}]$  **2c**[OTf] (1 equiv., 0.21 mmol) in 1.5 mL  $\text{C}_6\text{H}_5\text{F}$  at  $-30^\circ\text{C}$ . After stirring at room temperature overnight the yellow suspension is filtered, and the precipitate washed with a mixture of *o*- $\text{C}_6\text{H}_4\text{F}_2$  and benzene (2:1) and *n*-pentane yielding a crude product. Further purification was unsuccessful due to the compound's instability in

$^{31}\text{P}\{^1\text{H}\}$  NMR ( $\text{CD}_3\text{CN}$ , 300 K, in ppm): broadened  $\text{AX}_3$  spin system  $\delta(\text{P}_\text{A}) = -36.2$   $\delta(\text{P}_\text{X}) = -32.6$   
 $^1J(\text{PP}) = -101$  Hz.

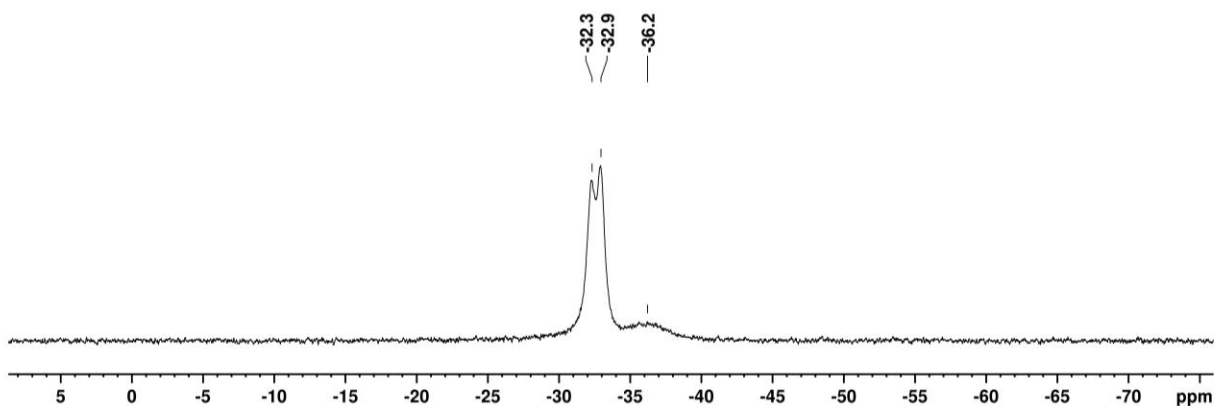

**Figure S43:**  $^{31}\text{P}$  NMR-spectrum of **6c**[OTf]<sub>3</sub> in  $\text{CD}_3\text{CN}$  at 300 K.

### 2.3.4. Variable Temperature NMR Studies

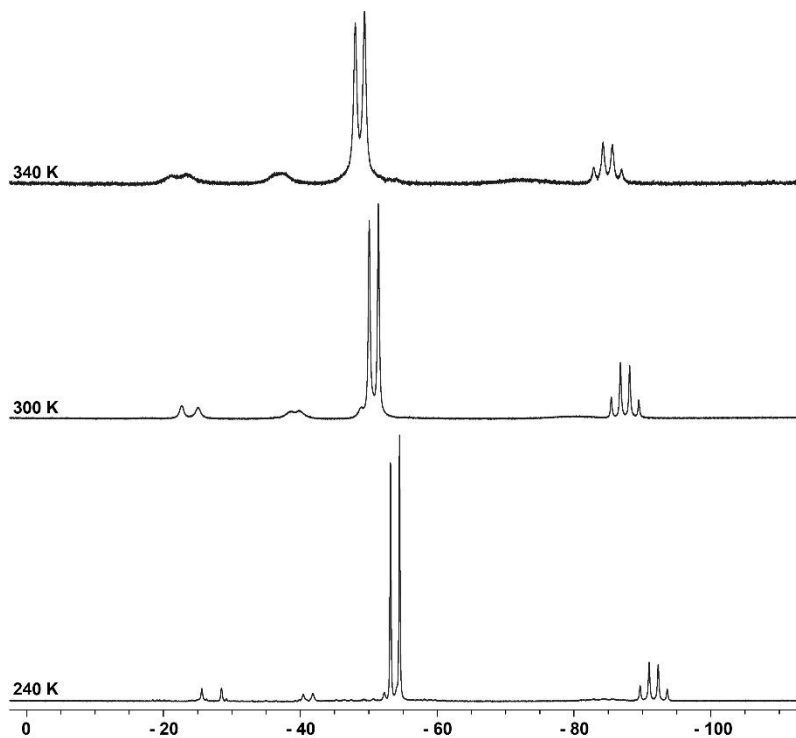

**Figure S44:** Variable temperature  $^{31}\text{P}\{^1\text{H}\}$  NMR spectra of  $6\mathbf{a}[\text{OTf}]_3$  in  $\text{CD}_3\text{CN}$  from 240 K to 340 K.

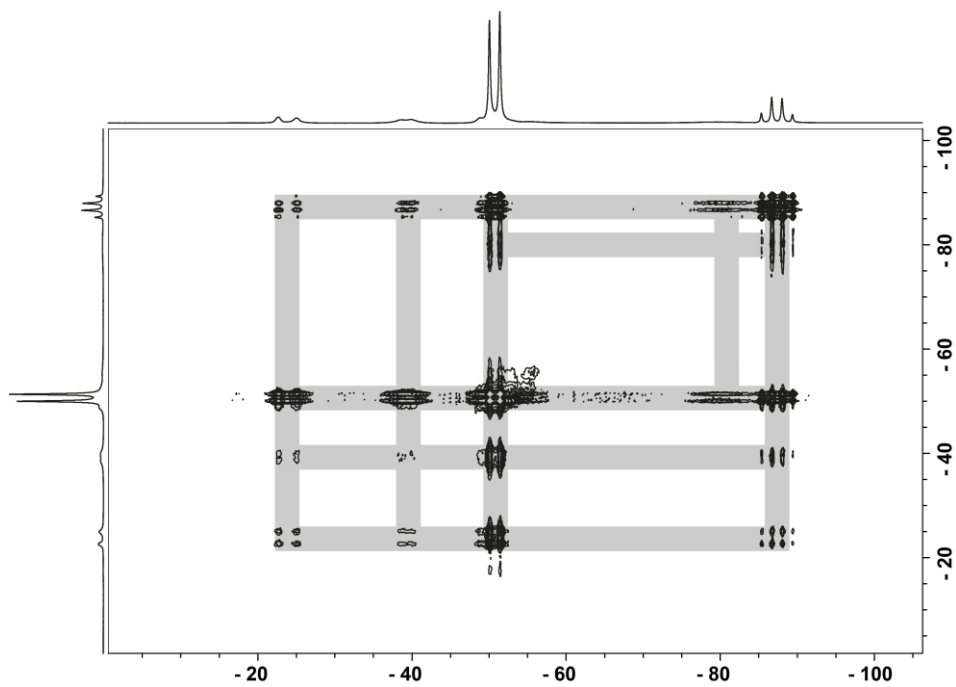

**Figure S45:**  $^{31}\text{P}$ - $^{31}\text{P}$ -EXSY NMR spectrum of  $6\mathbf{a}[\text{OTf}]_3$  in  $\text{CD}_3\text{CN}$  at 300 K (mixing time 1 s).

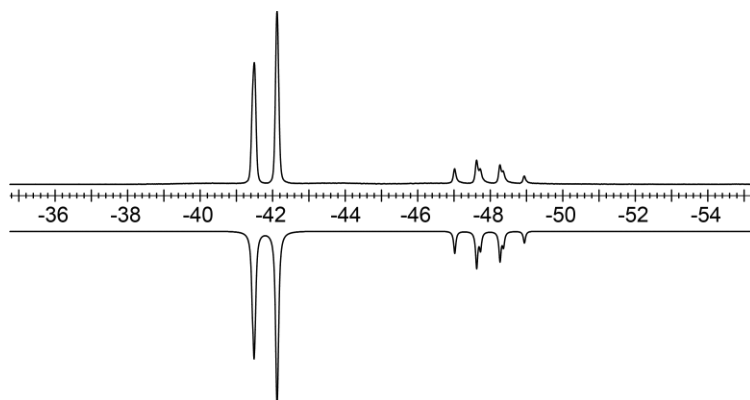

**Figure S46:**  $^{31}\text{P}\{^1\text{H}\}$  NMR spectra of **6b**[OTf]<sub>3</sub> in CD<sub>2</sub>Cl<sub>2</sub> at 300 K; experimental (upward) and fitted spectra (downward).

## 2.4. Reactions of Imidazoliumyl-substituted Diphosphanes 5a,b[OTf]<sub>2</sub> with Pd(PPh<sub>3</sub>)<sub>4</sub>

### 2.4.1. Preparation of [(L<sub>C</sub>PCy)(PdPPh<sub>3</sub>)<sub>2</sub>][OTf]<sub>2</sub> (7a[OTf]<sub>2</sub>)

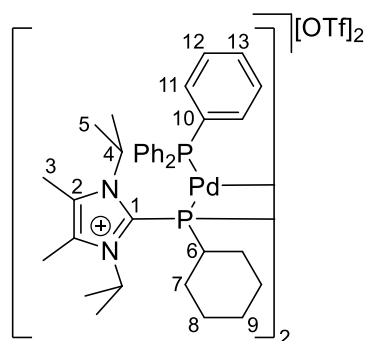

A suspension of 100 mg (L<sub>C</sub>PCy)<sub>2</sub>[OTf]<sub>2</sub> **5a**[OTf]<sub>2</sub> (1 equiv., 0.11 mmol) and 260 mg Pd(PPh<sub>3</sub>)<sub>4</sub> (2 equiv., 0.23 mmol) in 3 mL toluene is stirred at 120°C for 4 d. After cooling to room temperature, the dark precipitate is filtered and dissolved in CH<sub>3</sub>CN. Drying *in vacuo* affords the product as a dark brown powder. <sup>31</sup>P NMR investigations reveal the presence of two isomers A (82%) and B (18%).

**Yield:** 55 mg (30%); **m.p.** 273.0°C (dec.); **Raman** (100 mW, 50 scans, 298 K, [cm<sup>-1</sup>]): 3053 (69), 3008 (29), 2948 (68), 2915 (46), 2890 (31), 2870 (28), 2843 (20), 1624 (21), 1586 (47), 1441 (19), 1413 (34), 1356 (88), 1289 (100), 1151 (14), 1094 (23), 1030 (30), 1000 (45), 789 (17), 484 (26); **IR** (ATR, 298 K, [cm<sup>-1</sup>]): 3069 (vw), 3004 (vw), 2934 (vw), 2912 (w), 2842 (vw), 1622 (vw), 1478 (vw), 1456 (vw), 1436 (w), 1392 (w), 1374 (vw), 1265 (vs), 1222 (w), 1192 (vw), 1142 (s), 1091 (w), 1029 (s), 998 (vw), 759 (w), 747 (w), 696 (m), 636 (m), 571 (vw), 518 (m), 508 (m), 492 (w), 439 (vw); **isomer A (82%):** <sup>1</sup>H NMR (CD<sub>3</sub>CN, 300 K, in ppm) δ = 0.74 (24H, d, <sup>3</sup>J(HH) = 6.95 Hz, H5), 0.86 - 0.96 (4H, m, H9), 1.10 - 1.21 (4H, m, H7), 1.26 - 1.39 (4H, m, H8), 1.55 - 1.65 (8H, m, H7/8), 2.12 (12H, s, H3), 2.52 (2H, br, H6), 5.20 - 5.29 (4H, br, H4), 7.42 (12H, br. t, <sup>3</sup>J(HH) = 7.5 Hz, H12), 7.47 - 7.61 (18H, m, H11/H13); <sup>13</sup>C{<sup>1</sup>H} NMR (CD<sub>3</sub>CN, 300 K, in ppm): δ = 11.34 (4C, s, C3), 21.56 (8C, s, C5), 26.23 (2C, s, C9), 27.24 (4C, ps. t, C8), 34.31 (4C, ps. t, C7), 42.96 (2C, br, C6), 53.83 (4C, br, C4), 122.21 (2C, q, <sup>1</sup>J(CF) = -321 Hz, OTf), 130.00 (12C, ps. t, C12), 131.29 (4C, s, C2), 132.36 (6C, s, C13), 135.56 (12C, ps. t, C11), 136.79 (6C, ps. t, C10), 143.88 - 144.32 (2C, m, C1); <sup>19</sup>F{<sup>1</sup>H} NMR (CD<sub>3</sub>CN, 300 K, in ppm): δ = -79.31 (s); <sup>31</sup>P{<sup>1</sup>H} NMR (CD<sub>3</sub>CN, 300 K, in ppm): A<sub>2</sub>X<sub>2</sub> spin system δ(P<sub>A</sub>) = 26.5 δ(P<sub>X</sub>) = 141.8, <sup>2</sup>J(PP) = 37 Hz; **isomer B (18%):** <sup>1</sup>H NMR (CD<sub>3</sub>CN, 300 K, in ppm) δ = 0.84 (24H, d, <sup>3</sup>J(HH) = 6.75 Hz, H5), 1.26 - 1.39 (12H, m, H7/H8), 1.40 - 1.50 (4H, m, H9), 1.55 - 1.65 (4H, m, H8), 2.19 (12H, s, H3), 2.33 (2H, br, H6), 5.20 - 5.29 (4H, br, H4), 7.42 (12H, br. t, <sup>3</sup>J(HH) = 7.45 Hz, H12), 7.47 - 7.61 (18H, m, H11/H13); <sup>13</sup>C{<sup>1</sup>H} NMR (CD<sub>3</sub>CN, 300 K, in ppm): δ = 11.32 (4C, s, C3), 21.78 (8C, s, C5), 25.56 (2C, s, C9), 27.24 (4C, ps. t, C8), 32.61 (4C, ps. t, C7), 43.15 (2C, br, C6), 53.52 (4C, br, C4), 122.21 (2C, q, <sup>1</sup>J(CF) = -321 Hz, OTf), 130.18 (12C, ps. t, C12), 131.29 (4C, s, C2), 132.20 (6C, s, C13), 135.16 (12C, ps. t, C11), 136.12 (6C, ps. t, C10), 143.88 - 144.32 (2C, m, C1); <sup>19</sup>F{<sup>1</sup>H} NMR (CD<sub>3</sub>CN, 300 K, in ppm): δ = -79.32 (s); <sup>31</sup>P{<sup>1</sup>H} NMR (CD<sub>3</sub>CN, 300 K, in ppm): A<sub>2</sub>X<sub>2</sub> spin system δ(P<sub>A</sub>) = 25.3 δ(P<sub>X</sub>) = 132.8, <sup>2</sup>J(PP) = 38 Hz; **elemental analysis:** calculated for C<sub>72</sub>H<sub>92</sub>F<sub>6</sub>N<sub>4</sub>O<sub>6</sub>P<sub>4</sub>Pd<sub>2</sub>S<sub>2</sub>: N 3.45, C 53.24, H 5.71, S 3.95; found: N 3.41, C 53.10, H 5.59, S 3.48.

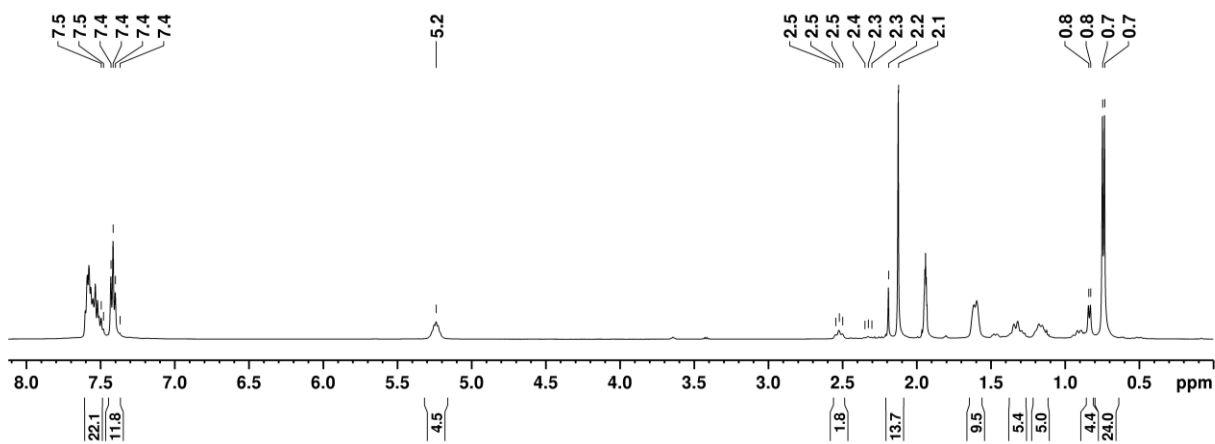

Figure S47:  $^1\text{H}$  NMR-spectrum of  $7\mathbf{a}[\text{OTf}]_2$  in  $\text{CD}_3\text{CN}$  at 300 K.

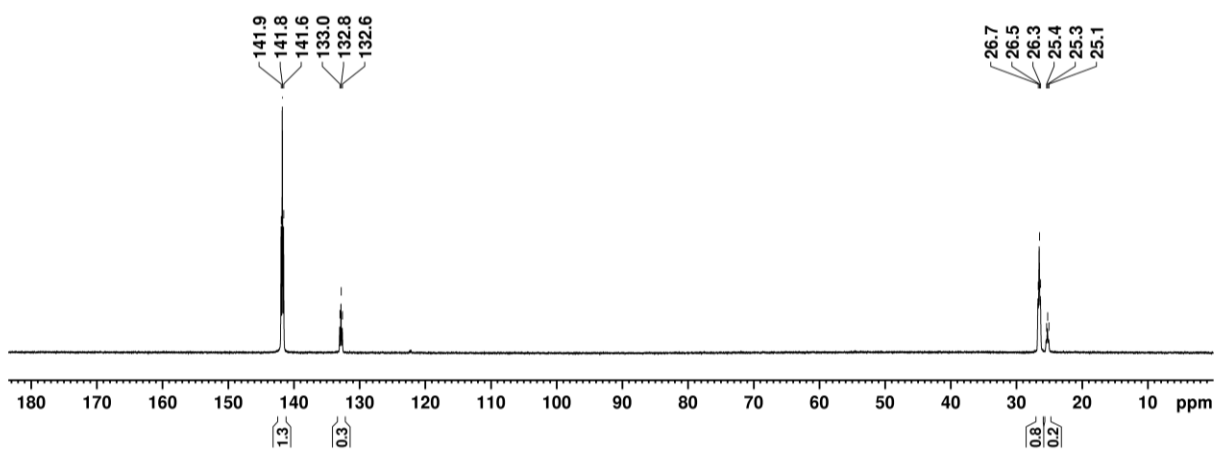

Figure S48:  $^{31}\text{P}\{^1\text{H}\}$  NMR-spectrum of  $7\mathbf{a}[\text{OTf}]_2$  in  $\text{CD}_3\text{CN}$  at 300 K.

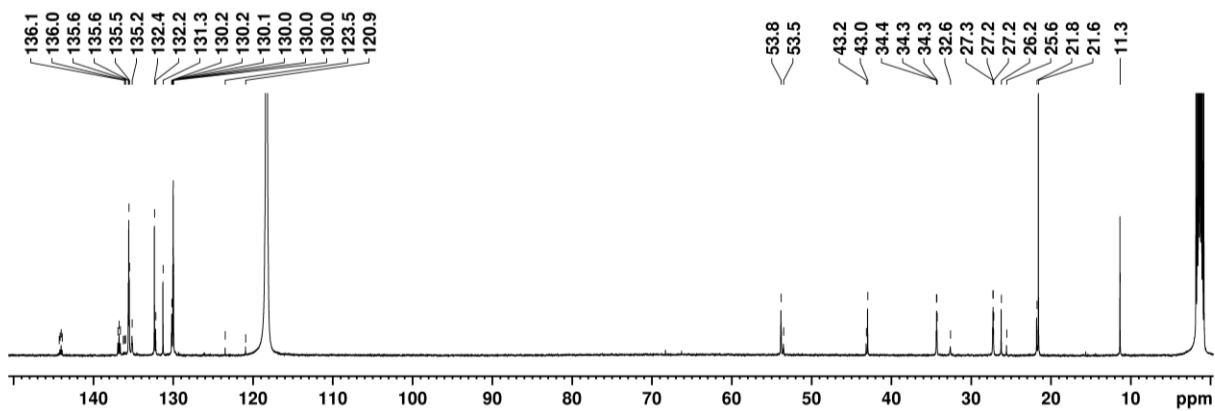

Figure S49:  $^{13}\text{C}\{^1\text{H}\}$  NMR-spectrum of  $7\mathbf{a}[\text{OTf}]_2$  in  $\text{CD}_3\text{CN}$  at 300 K.

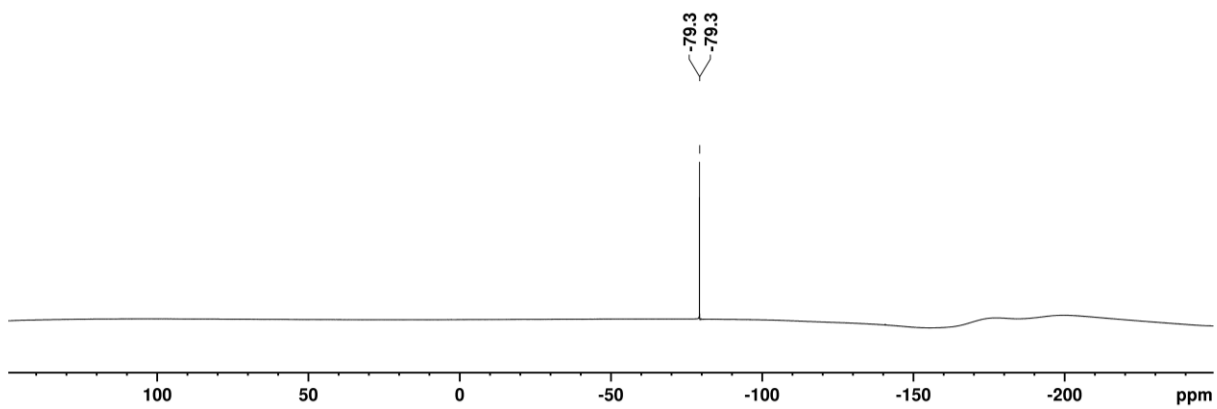

**Figure S50:**  $^{19}\text{F}$  NMR-spectrum of **7a**[OTf]<sub>2</sub> in CD<sub>3</sub>CN at 300 K.

## 2.4.2. Preparation of [(LcPPh(PdPPh<sub>3</sub>))<sub>2</sub>][OTf]<sub>2</sub> (**7b**[OTf]<sub>2</sub>)

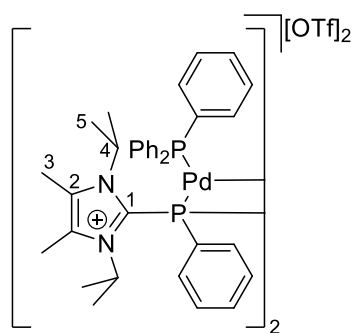

A solution of 200 mg (*i*PrImPPh)<sub>2</sub>[OTf]<sub>2</sub> **5b**[OTf]<sub>2</sub> (1 equiv., 0.23 mmol) and 555 mg Pd(PPh<sub>3</sub>)<sub>4</sub> (2.1 equiv., 0.48 mmol) in 6 mL CH<sub>2</sub>Cl<sub>2</sub> is stirred at room temperature overnight. After addition of *n*-pentane a dark precipitate forms. The supernatant solution is decanted off and the remaining solid is washed 3x4 mL with benzene. Washing with *n*-pentane and drying *in vacuo* affords the product as a dark purple powder. <sup>31</sup>P NMR investigations reveal the presence of two isomers A (85%) and B (15%). Suitable crystals for X-ray diffraction analysis can be obtained by diffusion of *n*-pentane

into a saturated CH<sub>2</sub>Cl<sub>2</sub> solution at –30°C.

**Yield:** 230 mg (63%); **m.p.** 259°C (dec.); **Raman** (80 mW, 300 scans, 298 K, [cm<sup>-1</sup>]): 3057 (33), 2940 (34), 1619 (29), 1581 (100), 1477 (27), 1438 (26), 1413 (39), 1352 (67), 1284 (91), 1185 (21), 1152 (25), 1084 (91), 1031 (41), 999 (91), 789 (23), 691 (26), 526 (19), 505 (36), 458 (30), 430 (24), 408 (22), 311 (26), 296 (22), 259 (58), 203 (22); **IR** (ATR, 298 K, [cm<sup>-1</sup>]): 3046 (vw), 2978 (vw), 1617 (vw), 1479 (vw), 1436 (w), 1265 (vs), 1223 (m), 1140 (s), 1096 (w), 1031 (s), 743 (m), 695 (m), 636 (vs); **isomer A (85%):** <sup>1</sup>H NMR (CD<sub>2</sub>Cl<sub>2</sub>, 300K, in ppm) δ = 0.84 (24H, d, <sup>3</sup>J(HH) = 6.96 Hz, H5), 2.33 (12H, s, H3), 5.57 (4H, m, H4), 6.85-7.50 (40H, m, Ar-H); <sup>13</sup>C{<sup>1</sup>H} NMR (CD<sub>2</sub>Cl<sub>2</sub>, 300K, in ppm): δ = 11.02 (4C, s, C3), 20.86 (8C, s, C5), 53.50 (4C, s, C4), 120.81 (2C, q, <sup>1</sup>J(CF) = –318 Hz, OTf), 128.97 (24C, m, Ar-C), 130.84 (16C, s, Ar-C/C2), 133.67 (12C, s, Ar-C), 141.48 – 141.99 (2C, m, C1); <sup>19</sup>F{<sup>1</sup>H} NMR (CD<sub>2</sub>Cl<sub>2</sub>, 300K, in ppm): δ = –78.8 (s); <sup>31</sup>P{<sup>1</sup>H} NMR (CD<sub>2</sub>Cl<sub>2</sub>, 300K, in ppm): A<sub>2</sub>X<sub>2</sub> spin system δ(P<sub>A</sub>) = 24.5 δ(P<sub>X</sub>) = 105.3, <sup>2</sup>J(PP) = 44 Hz; **isomer B (15%):** <sup>1</sup>H NMR (CD<sub>2</sub>Cl<sub>2</sub>, 300K, in ppm) δ = 0.74 (24H, d, <sup>3</sup>J(HH) = 7.00 Hz, H5), 2.27 (12H, s, H3), 5.37 (4H, m, H4), 6.85-7.50 (40H, m, Ar-H); <sup>13</sup>C{<sup>1</sup>H} NMR (CD<sub>2</sub>Cl<sub>2</sub>, 300K, in ppm): δ = 10.92 (4C, s, C3), 20.49 (8C, s, C5), 53.50 (4C, s, C4), 120.81 (2C, q, <sup>1</sup>J(CF) = –318 Hz, OTf), 128.97 (24C, m, Ar-C), 130.68 (4C, s, C2), 130.84 (12C, s, Ar-C), 133.67 (12C, s, Ar-C), 141.48 – 141.99 (2C, m, C1); <sup>19</sup>F{<sup>1</sup>H} NMR (CD<sub>2</sub>Cl<sub>2</sub>, 300K, in ppm): δ = –78.8 (s); <sup>31</sup>P{<sup>1</sup>H} NMR (CD<sub>2</sub>Cl<sub>2</sub>, 300K, in ppm): A<sub>2</sub>X<sub>2</sub> spin system δ(P<sub>A</sub>) = 25.9 δ(P<sub>X</sub>) = 111.5, <sup>2</sup>J(PP) = 41 Hz; **elemental analysis:** calculated for **7b**[OTf]·0.5 CH<sub>2</sub>Cl<sub>2</sub> C<sub>72</sub>H<sub>92</sub>F<sub>6</sub>N<sub>4</sub>O<sub>6</sub>P<sub>4</sub>Pd<sub>2</sub>S<sub>2</sub>: N 3.39, C 52.62, H 4.93, S 3.87; found: N 3.51, C 52.69, H 4.92, S 4.00.

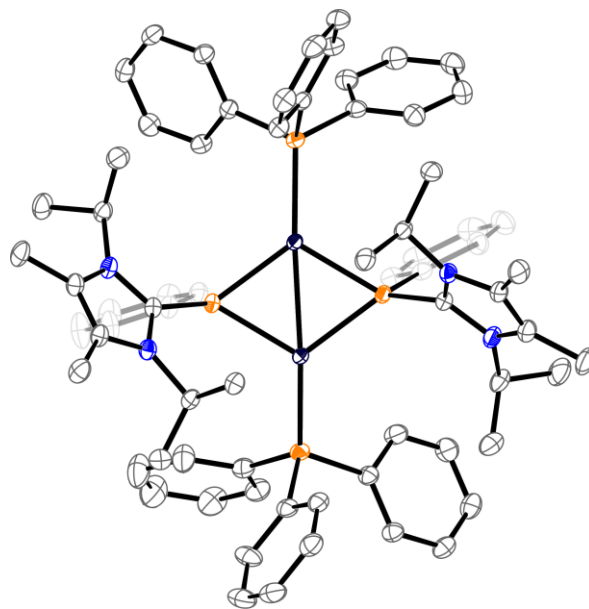

**Figure S51:** Molecular structure of cation  $7b^{2+}$  in  $7b[OTf]_2 \cdot 4 CH_2Cl_2$  (hydrogen atoms, solvate molecules, and anions are omitted for clarity and ellipsoids are set at 50% probability).

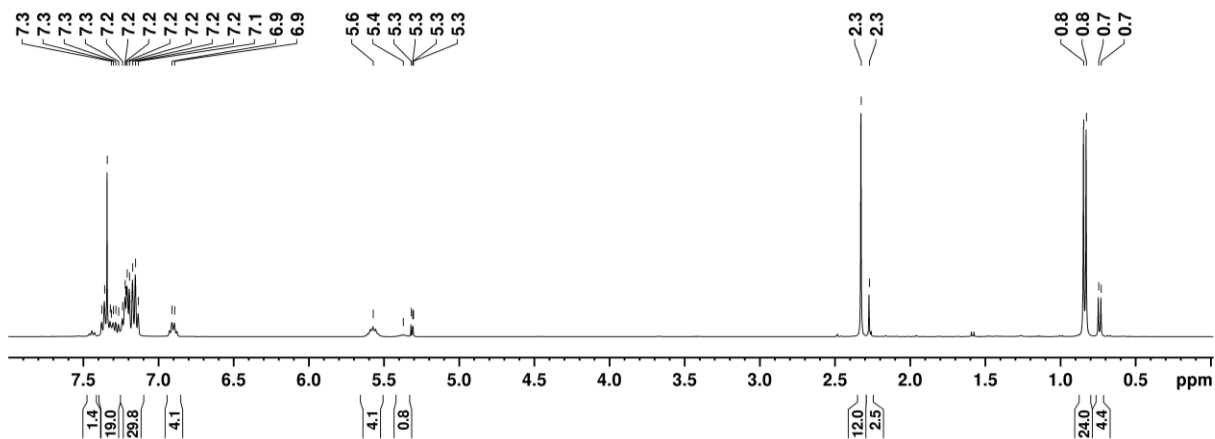

**Figure S52:**  $^1H$  NMR-spectrum of  $7b[OTf]_2$  in  $CD_2Cl_2$  at 300 K.

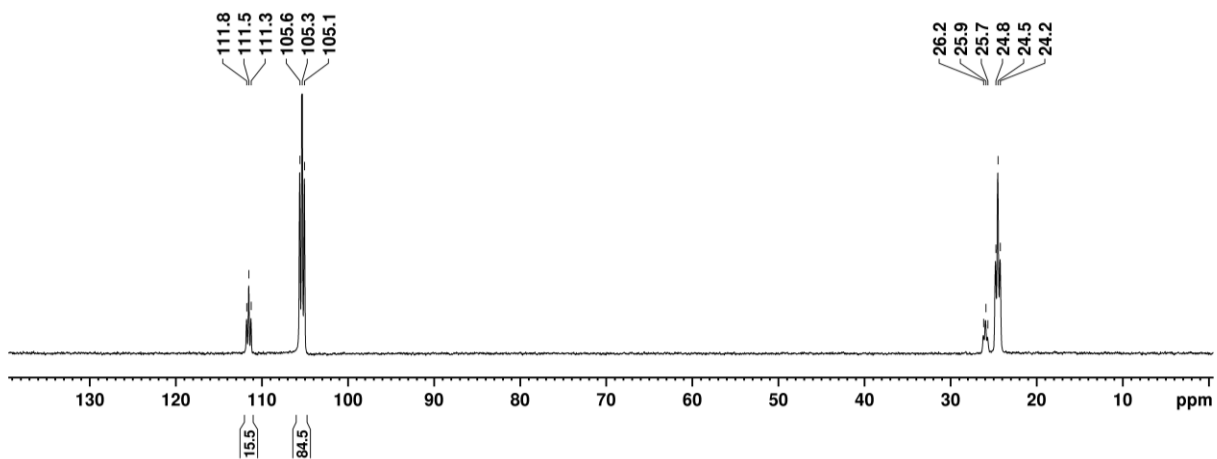

Figure S53:  $^{31}\text{P}$  NMR-spectrum of **7b**[OTf] $_2$  in  $\text{CD}_2\text{Cl}_2$  at 300 K.

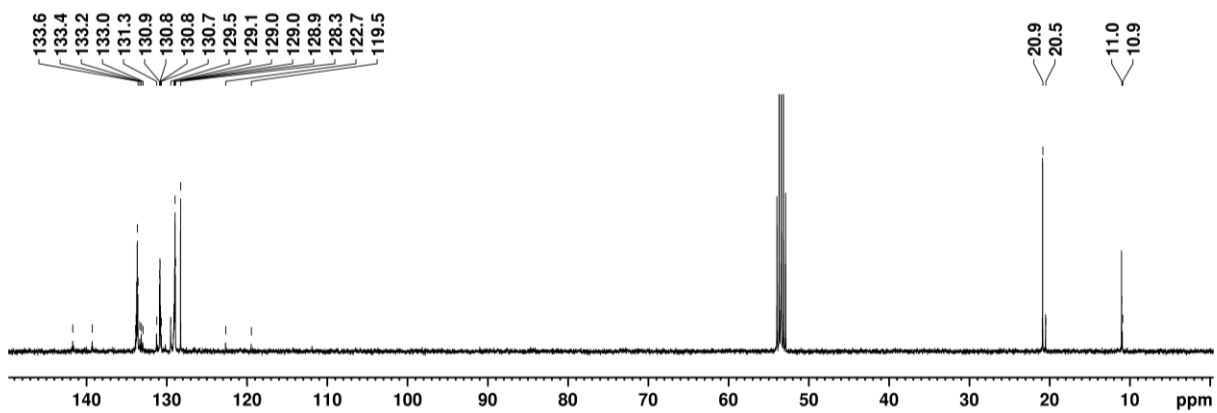

Figure S54:  $^{13}\text{C}\{^1\text{H}\}$  NMR-spectrum of **7b**[OTf] $_2$  in  $\text{CD}_2\text{Cl}_2$  at 300 K.

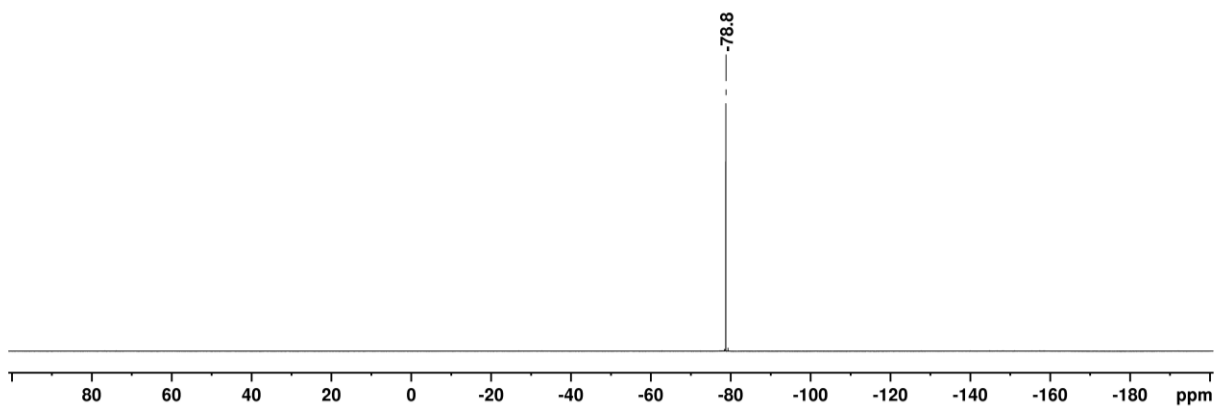

Figure S55:  $^{19}\text{F}$  NMR-spectrum of **7b**[OTf] $_2$  in  $\text{CD}_2\text{Cl}_2$  at 300 K.

### 2.4.3. Preparation of $[(iPrIm)(PdPPh_3)_2(CyP=PCy)][OTf]_2$ (**8** $[OTf]_2$ )

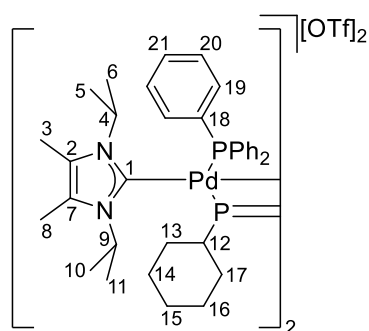

A suspension of 100 mg  $(LcPCy)_2[OTf]_2$  **5a** $[OTf]_2$  (1 equiv., 0.11 mmol) and 260 mg  $Pd(PPh_3)_4$  (2 equiv., 0.23 mmol) in 3 mL *o*- $C_6H_4F_2$  is stirred at 40°C for 14. After cooling to rt the suspension is filtered, and the solution layered with  $Et_2O$  at  $-30^\circ C$ . After filtration and washing with 3x1 mL  $Et_2O$  of all volatiles are removed and the product is obtained as red crystalline material. Suitable crystals for X-ray diffraction analysis can be obtained by diffusion of  $Et_2O$  into a saturated *o*- $C_6H_4F_2$  solution at  $-30^\circ C$ .

**Yield:** 100 mg (54%); **m.p.** 83.5°C (dec.); **Raman** (100 mW, 50 scans, 298 K,  $[cm^{-1}]$ ): fluorescence; **IR** (ATR, 298 K,  $[cm^{-1}]$ ): 2970 (w), 2933 (w), 2849 (w), 1592 (vw), 1505 (vw), 1480 (w), 1465 (w), 1435 (w), 1387 (w), 1262 (vs), 1220 (m), 1187 (w), 1156 (s), 1096 (m), 1072 (w), 1025 (s), 997 (w), 904 (w), 804 (w), 751 (s), 694 (m), 633 (vs), 571 (w), 521 (vs), 506 (s), 494 (s), 450 (w), 440 (w), 426 (w);  **$^1H$  NMR** ( $CD_3CN$ , 300 K, in ppm)  $\delta$  = 0.39 - 0.5 (2H, m, H13), 0.58 (6H, d,  $^3J(HH)$  = 7.1 Hz, H5), 0.94 (6H, d,  $^3J(HH)$  = 7.1 Hz, H11), 1.00 - 1.17 (10H, m, H13/H14/H15/H16/H17), 1.23 (6H, d,  $^3J(HH)$  = 7.2 Hz, H10), 1.35 (6H, d,  $^3J(HH)$  = 7.0 Hz, H16), 1.42 - 1.52 (6H, m, H15/H16/H17), 1.57 - 1.66 (2H, m, H14) 2.09 (6H, s, H3), 2.26 (6H, s, H8), 2.27 - 2.35 (2H, m, H12), 4.92 (2H, sept,  $^3J(HH)$  = 7.1 Hz, H4), 4.98 (2H, sept,  $^3J(HH)$  = 7.2 Hz, H9), 7.28 - 7.34 (12H, m, H19), 7.48 - 7.53 (12H, m, H20), 7.62 (6H, t,  $^3J(HH)$  = 7.35 Hz, H21);  **$^{13}C\{^1H\}$  NMR** ( $CD_3CN$ , 300 K, in ppm):  $\delta$  = 10.80 (2C, s, C3), 10.93 (2C, s, C8), 20.25 (2C, s, C5), 21.03 (2C, s, C10), 22.01 (2C, s, C11), 23.40 (2C, s, C6), 25.07 (2C, s, C15), 27.49 (2C, ps. t, C16), 27.69 (2C, ps. t, C14), 33.45 (2C, ps. t, C13), 35.23 (2C, s, C17), 37.05 - 37.43 (2C, m, C12), 37.23 (2C, dd,  $^1J(CP)$  = -20 Hz,  $^2J(CP)$  = 15 Hz, C12), 56.44 (2C, s, C4) 56.34 (2C, s, C9), 122.21 (2C, q,  $^1J(CF)$  = -321 Hz, OTf), 128.59 (2C, s, C7), 130.10 (2C, s, C2), 130.63 (12C, ps. t, C20), 132.82 (6C, s, C21), 132.84 (12C, d,  $^1J(CP)$  = -43 Hz, C18), 134.31 (12C, ps. t, C19), 159.15 (2C, ps. t, C1);  **$^{19}F\{^1H\}$  NMR** ( $CD_3CN$ , 300 K, in ppm):  $\delta$  = -79.32 (s);  **$^{31}P\{^1H\}$  NMR** ( $CD_3CN$ , 300 K, in ppm): see below; **elemental analysis:** calculated for  $C_{72}H_{92}F_6N_4O_6P_4Pd_2S_2$ : N 3.45, C 53.24, H 5.71, S 3.95; found: N 3.47, C 53.12, H 5.64, S 3.70.

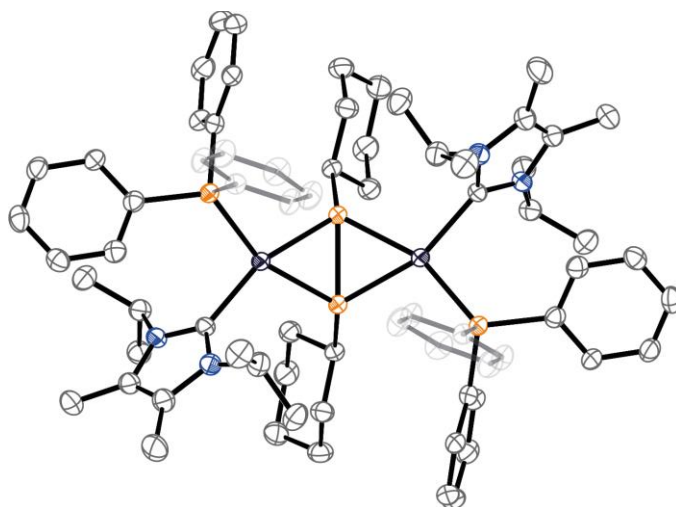

**Figure S56:** Molecular structure of cation  $8^{2+}$  in  $8[OTf]_2 \cdot 2 C_6H_4F_2$  (hydrogen atoms, solvate molecules, and anions are omitted for clarity and ellipsoids are set at 50% probability).

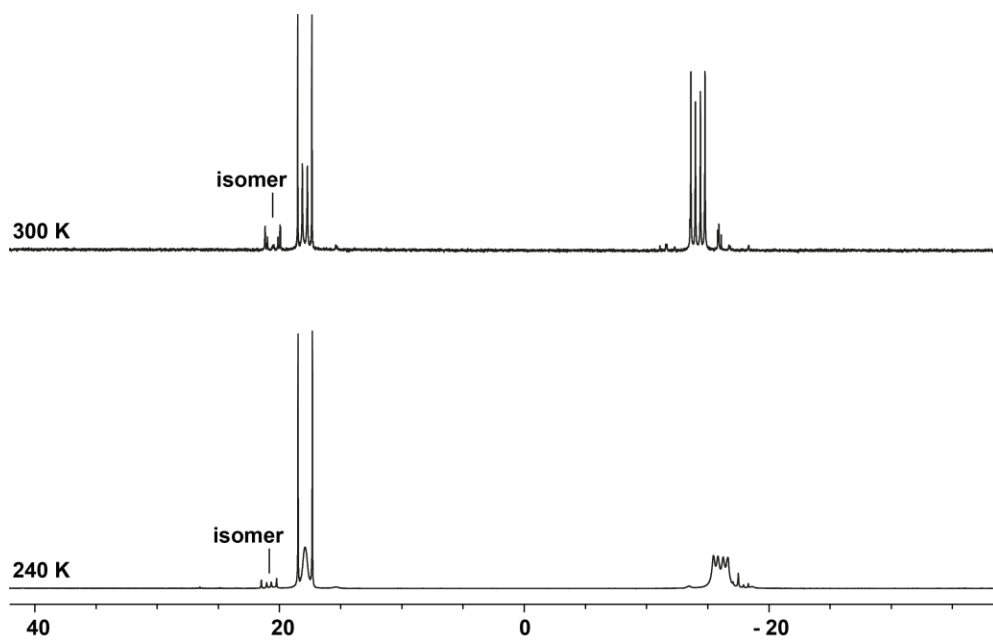

**Figure S57:**  $^{31}P\{^1H\}$  NMR-spectra of  $8[OTf]_2$  at 300 K in  $CD_3CN$  (top) and at 240 K in  $CD_2Cl_2$  (bottom).

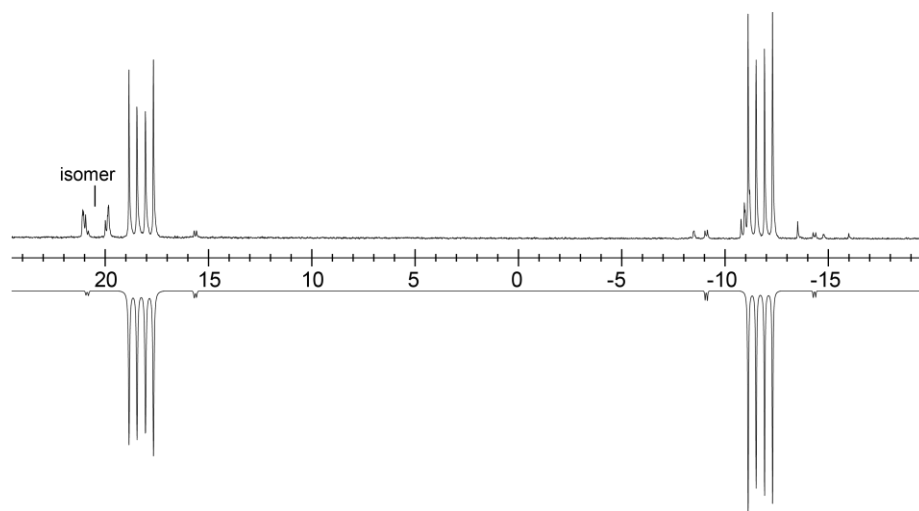

**Figure S58:** High temperature  $^{31}\text{P}\{^1\text{H}\}$  NMR spectra of  $\mathbf{8}[\text{OTf}]_2$  in *o*- $\text{C}_6\text{H}_4\text{F}_2$  and toluene- $\text{d}^8$  at 340 K; experimental (upward) and fitted spectra (downward); parameters of the spin systems are given in **Table S 1**.

**Table S 1:** Iteratively generated parameters for the  $^{31}\text{P}\{^1\text{H}\}$  NMR resonances of  $\mathbf{8}[\text{OTf}]_2$ .

|                       | Iterated parameter                                                                    | Value      |
|-----------------------|---------------------------------------------------------------------------------------|------------|
| <b>chemical shift</b> | $\delta(\text{P}_\text{A})$                                                           | -11.70 ppm |
|                       | $\delta(\text{P}_\text{X})$                                                           | 18.23 ppm  |
| <b>line width</b>     | $\nu_\text{A}$                                                                        | 12.3 Hz    |
|                       | $\nu_\text{X}$                                                                        | 8.6 Hz     |
| <b>coupling</b>       | $^1J(\text{P}_\text{A}\text{P}_\text{A})$                                             | -489.4 Hz  |
| <b>constants</b>      | $^2J(\text{P}_\text{A}\text{P}_\text{X}) = ^2J(\text{P}_\text{A}'\text{P}_\text{X}')$ | 267.6 Hz   |
|                       | $^2J(\text{P}_\text{A}\text{P}_\text{X}') = ^2J(\text{P}_\text{A}'\text{P}_\text{X})$ | -27.7 Hz   |
|                       | $^4J(\text{P}_\text{X}\text{P}_\text{X}')$                                            | 12.4 Hz    |

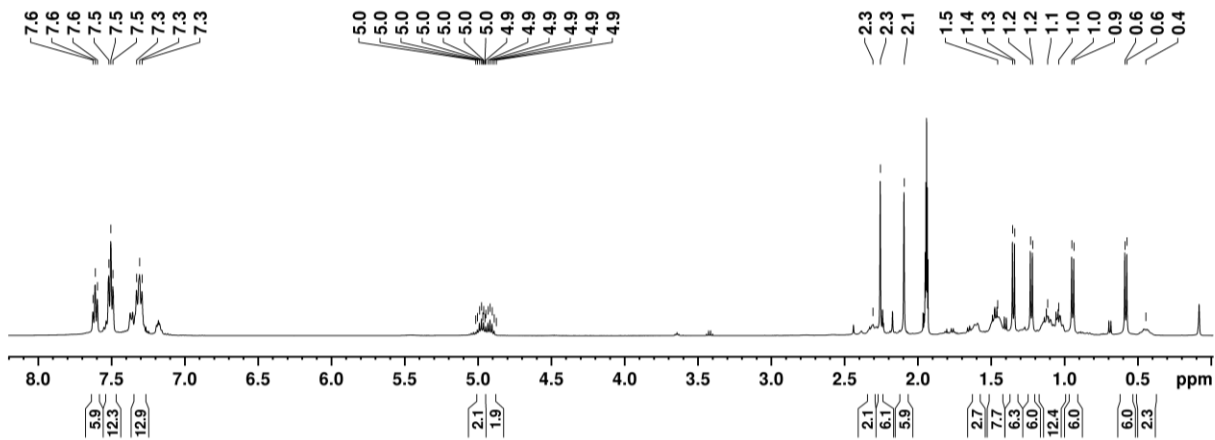

Figure S59:  $^1\text{H}$  NMR-spectrum of  $8[\text{OTf}]_2$  in  $\text{CD}_3\text{CN}$  at 300 K.

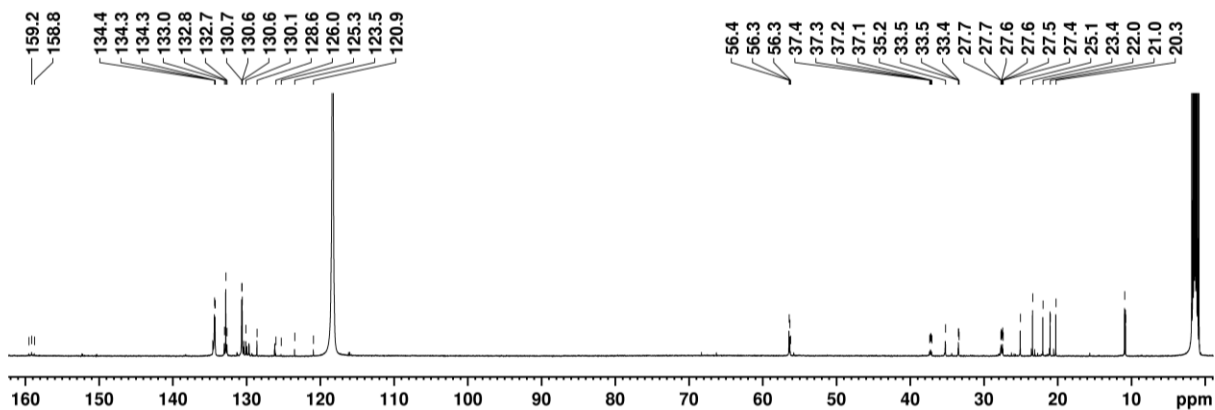

Figure S60:  $^{13}\text{C}\{^1\text{H}\}$  NMR-spectrum of  $8[\text{OTf}]_2$  in  $\text{CD}_3\text{CN}$  at 300 K.

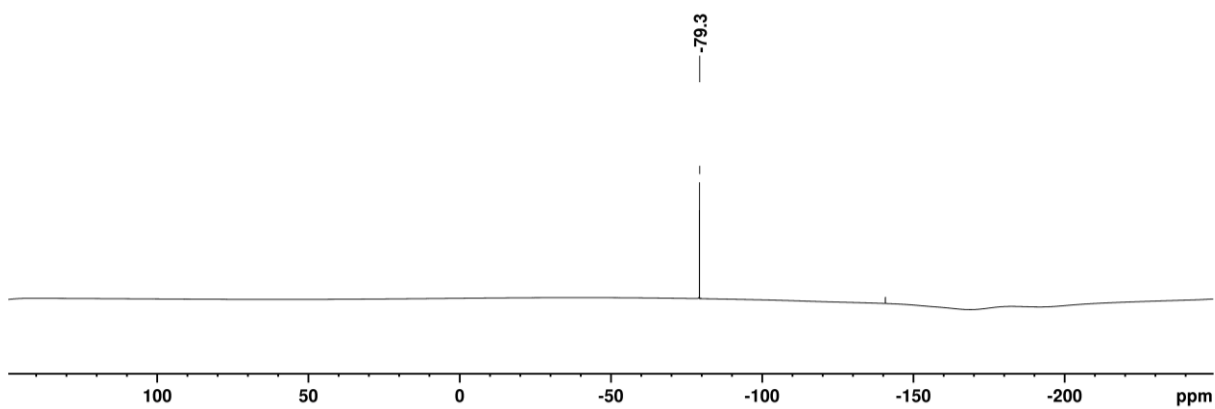

Figure S61:  $^{19}\text{F}$  NMR-spectrum of  $8[\text{OTf}]_2$  in  $\text{CD}_3\text{CN}$  at 300 K.

## 2.5. Reactions of Imidazoliumyl-substituted iso-Tetraphosphanes 6a,b[OTf]<sub>3</sub> with Nucleophiles

### 2.5.1. Preparation of [(LcPCy)<sub>2</sub>PPd(η<sup>3</sup>-C<sub>3</sub>H<sub>5</sub>)] [OTf]<sub>2</sub> (**9**[OTf]<sub>2</sub>)

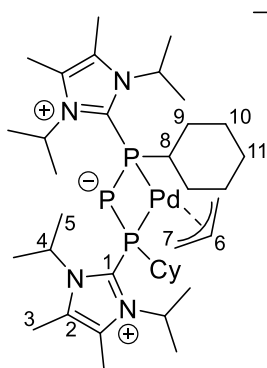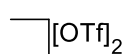

A solution of ((η<sup>3</sup>-C<sub>3</sub>H<sub>5</sub>)PdCl)<sub>2</sub> (0.45 equiv., 26 mg, 0.07 mmol) in 1 mL CH<sub>3</sub>CN is added to a solution of (LcPCy)<sub>3</sub>P[OTf]<sub>3</sub> **6a**[OTf]<sub>3</sub> (1 equiv., 200 mg, 0.15 mmol) in 2 mL CH<sub>3</sub>CN at -30°C. A color change to orange is observed. After 30 min stirring, all volatiles are removed and the residue is dissolved in *o*-C<sub>6</sub>H<sub>4</sub>F<sub>2</sub>. After filtration the solution is layered with *n*-hexane. The resulting oil is stirred with toluene for 16 h and subsequently washed with 3x2 mL toluene. Washing with *n*-pentane and removal of all volatiles affords the product as an orange powder. Suitable crystals for X-

ray diffraction analysis can be obtained by diffusion of *n*-pentane into a saturated *o*-C<sub>6</sub>H<sub>4</sub>F<sub>2</sub>/THF (v/v = 1:1) solution at -30°C. In the molecular structure, the allyl substituent of the palladium complex **8**[OTf]<sub>2</sub> is disordered over two positions, of which the major one is displayed in **Figure 4**.

**Yield:** 90 mg (59%); **m.p.** 144.3°C (dec.); **Raman** (80 mW, 50 scans, 298 K, [cm<sup>-1</sup>]): 2940 (100), 2874 (30), 2857 (37), 1622 (27), 1447 (43), 1413 (40), 1387 (18), 1361 (45), 1285 (74), 1153 (15), 1032 (63), 885 (16), 753 (21), 738 (16), 479 (21), 460 (18); **IR** (ATR, 298 K, [cm<sup>-1</sup>]): 2983 (vw), 2928 (w), 2852 (w), 1620 (vw), 1449 (w), 1396 (w), 1376 (w), 1260 (vs), 1220 (m), 1141 (s), 1029 (vs), 904 (w), 884 (w), 850 (w), 786 (w), 753 (w), 735 (w), 635 (vs), 571 (m), 559 (w), 516 (s), 492 (m), 455 (w); **isomer A (56%):** <sup>1</sup>H NMR (CD<sub>2</sub>Cl<sub>2</sub>, 300 K, in ppm) δ = 0.86 - 1.01 (2H, m, H<sub>9</sub>), 1.09 - 1.43 (8H, m, H<sub>9</sub>/H<sub>10</sub>/H<sub>11</sub>) 1.50 - 1.75 (24H, m, H<sub>5</sub>), 1.75 - 1.88 (4H, m, H<sub>10</sub>/H<sub>11</sub>), 1.93 - 2.06 (6H, m, H<sub>8</sub>/H<sub>10</sub>), 2.53 - 2.60 (1H, br, H<sub>9</sub>), 2.36 (6H, s, H<sub>3</sub>), 2.38 (6H, s, H<sub>3</sub>), 2.76 - 2.84 (1H, br, H<sub>9</sub>), 3.60 - 3.68 (2H, m, H<sub>7</sub>), 4.46 - 4.55 (2H, br, H<sub>4</sub>), 4.56 - 4.60 (2H, m, H<sub>7</sub>), 5.73 - 5.97 (3H, m, H<sub>4</sub>/H<sub>6</sub>); <sup>13</sup>C{<sup>1</sup>H} NMR (CD<sub>2</sub>Cl<sub>2</sub>, 300 K, in ppm) δ = 10.62 - 11.77 (4C, m, C<sub>3</sub>), 20.83 - 22.00 (8C, m, C<sub>5</sub>), 25.91 (2C, s, C<sub>11</sub>), 26.63 - 27.00 (4C, m, C<sub>10</sub>), 30.26 - 30.43 (1C, m, C<sub>9</sub>), 30.61 - 30.78 (2C, br, C<sub>9</sub>), 31.10 (1C, s, C<sub>9</sub>), 42.35 - 42.75 (2C, m, C<sub>8</sub>), 52.43 - 55.00 (4C, m, C<sub>4</sub>), 70.37 - 70.81 (2C, m, C<sub>7</sub>) 119.66 (1C, t, <sup>2</sup>J(CP) = 8.7 Hz, C<sub>6</sub>), 121.29 (2C, q, <sup>1</sup>J(CF) = -321 Hz, OTf), 130.61 (4C, s, C<sub>3</sub>), 140.30 - 140.89 (2C, m, C<sub>1</sub>); <sup>19</sup>F{<sup>1</sup>H} NMR (CD<sub>3</sub>CN, 300 K, in ppm): δ = -78.77 (s); <sup>31</sup>P{<sup>1</sup>H} NMR (CD<sub>2</sub>Cl<sub>2</sub>, 300 K, in ppm) AX<sub>2</sub> spin system δ(P<sub>A</sub>) = -61.3 ppm, δ(P<sub>X</sub>) = -16.1 ppm, <sup>1</sup>J(PP) = -323 Hz; **isomer B (44%):** <sup>1</sup>H NMR (CD<sub>2</sub>Cl<sub>2</sub>, 300 K, in ppm) δ = 0.86 - 1.01 (2H, m, H<sub>9</sub>), 1.09 - 1.43 (8H, m, H<sub>9</sub>/H<sub>10</sub>/H<sub>11</sub>) 1.50 - 1.75 (24H, m, H<sub>5</sub>), 1.75 - 1.88 (4H, m, H<sub>10</sub>/H<sub>11</sub>), 1.93 - 2.06 (6H, m, H<sub>8</sub>/H<sub>10</sub>), 2.53 - 2.60 (1H, br, H<sub>9</sub>), 2.36 (6H, s, H<sub>3</sub>), 2.38 (6H, s, H<sub>3</sub>), 2.76 - 2.84 (1H, br, H<sub>9</sub>), 3.32 - 3.40 (2H, m, H<sub>7</sub>), 4.46 - 4.55 (2H, br, H<sub>4</sub>), 5.05 - 5.11 (2H, m, H<sub>7</sub>), 5.73 - 5.97 (3H, m, H<sub>4</sub>/H<sub>6</sub>), <sup>13</sup>C{<sup>1</sup>H} NMR (CD<sub>2</sub>Cl<sub>2</sub>, 300 K, in ppm) δ = 10.62 - 11.77 (4C, m, C<sub>3</sub>), 20.83 - 22.00 (8C, m, C<sub>5</sub>), 26.00 (2C, s, C<sub>11</sub>), 26.63 - 27.00 (4C, m, C<sub>10</sub>),

30.26 - 30.43 (1C, m, C9), 30.61 - 30.78 (2C, br, C9), 31.10 (1C, s, C9), 42.82 - 43.20 (2C, m, C8), 52.43 - 55.00 (4C, m, C4), 69.90 - 70.33 (2C, m, C7), 121.29 (2C, q,  $^1J(\text{CF}) = -321$  Hz, OTf), 122.17 (1C, t,  $^2J(\text{CP}) = 9.0$  Hz, C6), 131.12 - 131.43 (4C, m, C3), 140.30 - 140.89 (2C, m, C1); );  $^{19}\text{F}\{^1\text{H}\}$  NMR ( $\text{CD}_3\text{CN}$ , 300 K, in ppm):  $\delta = -78.77$  (s);  $^{31}\text{P}\{^1\text{H}\}$  NMR ( $\text{CD}_2\text{Cl}_2$ , 300 K, in ppm)  $\text{AX}_2$  spin system  $\delta(\text{P}_\text{A}) = -57.6$  ppm,  $\delta(\text{P}_\text{X}) = -25.1$  ppm,  $^1J(\text{PP}) = -321$  Hz; **elemental analysis:** calculated for  $\mathbf{9}[\text{OTf}]_2 \cdot 0.5 \text{CH}_2\text{Cl}_2$   $\text{C}_{39.5}\text{H}_{68}\text{F}_6\text{ClN}_4\text{O}_6\text{P}_3\text{PdS}_2$ : N 5.06, C 42.82, H 6.19, S 5.79; found: N 4.83, C 42.86, H 6.13, S 5.50.

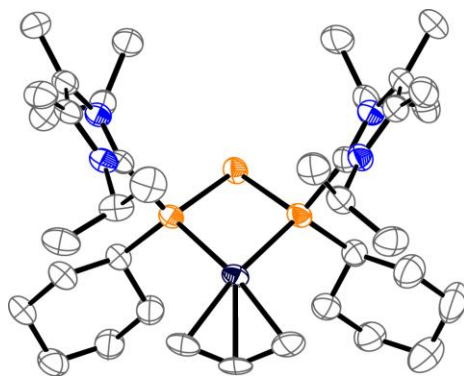

**Figure S62:** Molecular structure of cation  $\mathbf{9}^{2+}$  in  $\mathbf{9}[\text{OTf}]_2 \cdot \text{C}_6\text{H}_5\text{F} \cdot 0.5 \text{THF}$  (hydrogen atoms, solvate molecules, and anions are omitted for clarity and ellipsoids are set at 50% probability).

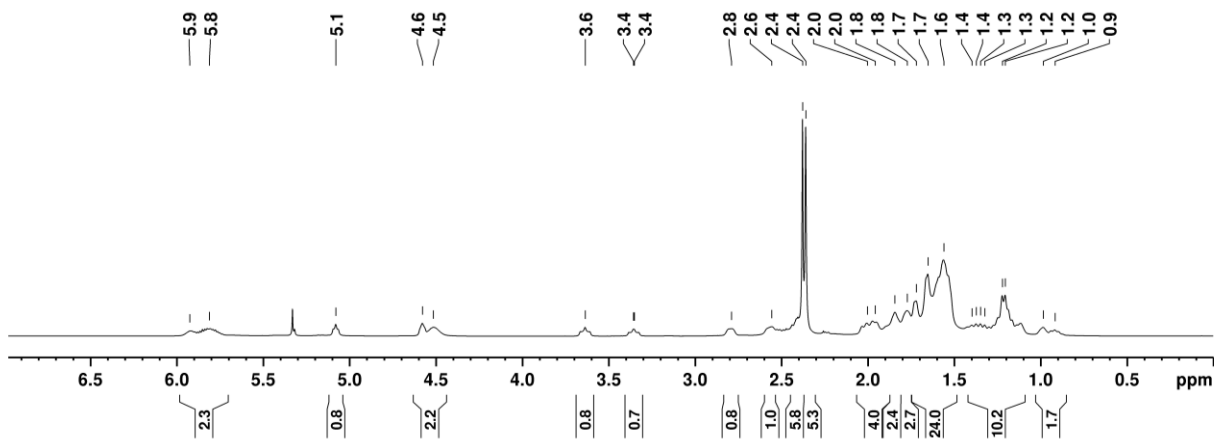

**Figure S63:**  $^1\text{H}$  NMR-spectrum of  $\mathbf{9}[\text{OTf}]_2$  in  $\text{CD}_2\text{Cl}_2$  at 300 K.

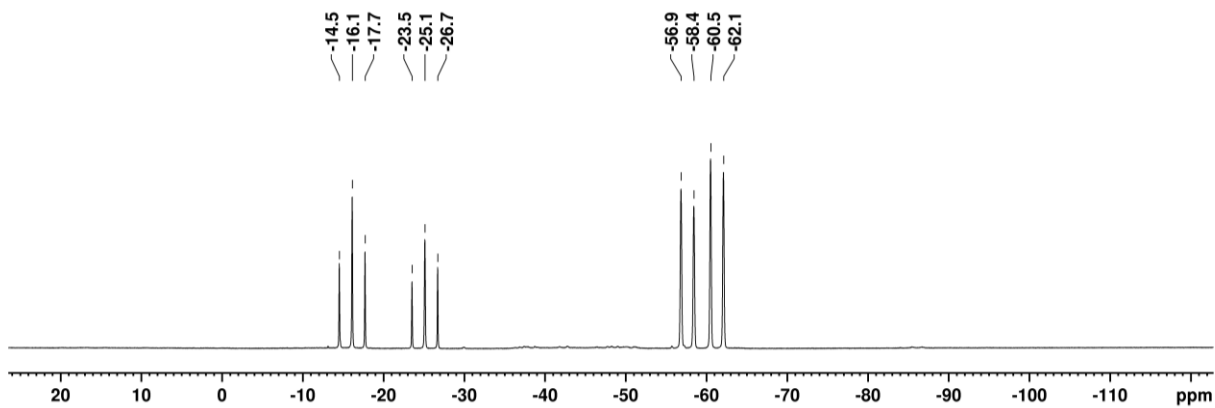

Figure S64:  $^{31}\text{P}\{^1\text{H}\}$  NMR-spectrum of  $\mathbf{9}[\text{OTf}]_2$  in  $\text{CD}_2\text{Cl}_2$  at 300 K.

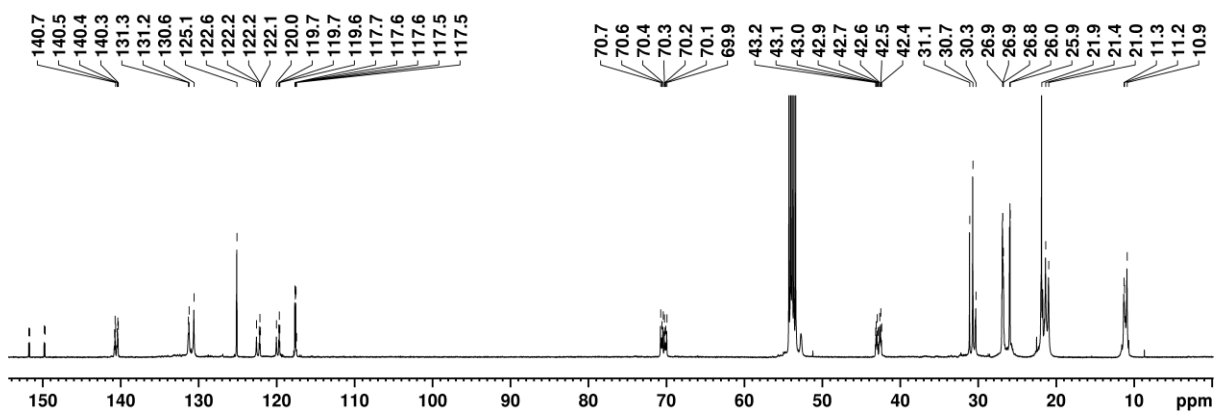

Figure S65:  $^{13}\text{C}\{^1\text{H}\}$  NMR-spectrum of  $\mathbf{9}[\text{OTf}]_2$  in  $\text{CD}_2\text{Cl}_2$  at 300 K.

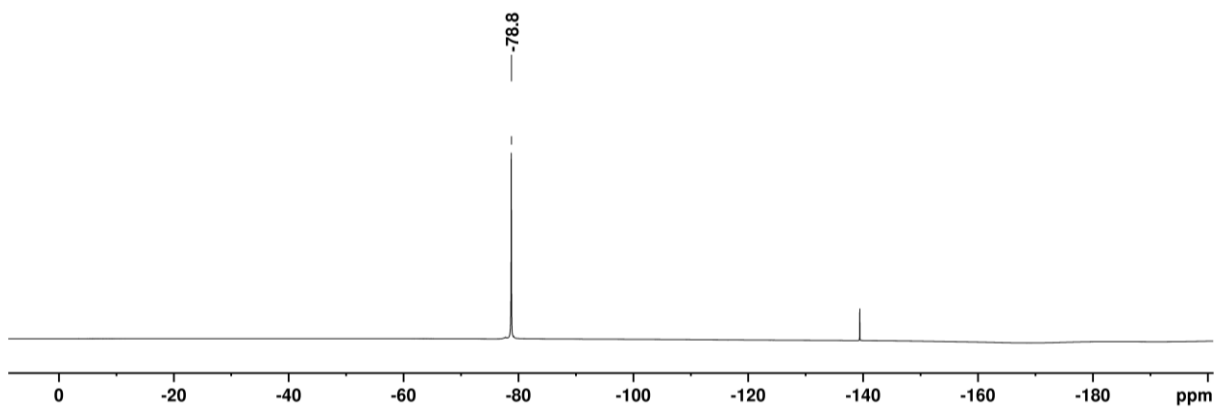

Figure S66:  $^{19}\text{F}$  NMR-spectrum of  $\mathbf{9}[\text{OTf}]_2$  in  $\text{CD}_2\text{Cl}_2$  at 300 K; some residual  $\text{C}_6\text{H}_5\text{F}$  is observed at  $\sim -140$  ppm.



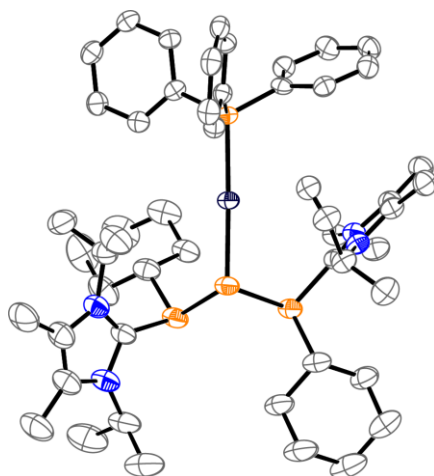

**Figure S67:** Molecular structure of cation  $10^{2+}$  in  $10[OTf]_2 \cdot 1.5 CH_2Cl_2 \cdot 2 MeCN$  (hydrogen atoms, solvate molecules, and anions are omitted for clarity and ellipsoids are set at 50% probability).

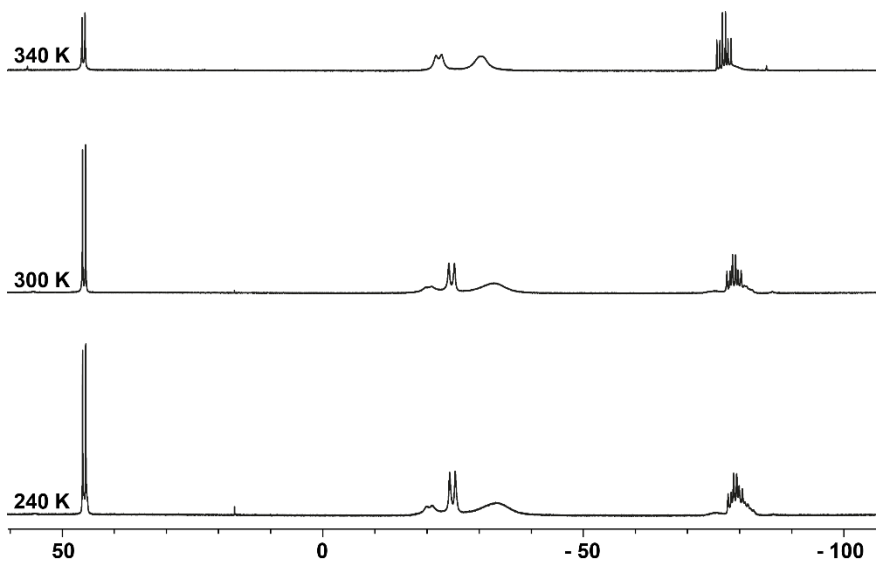

**Figure S68:**  $^{31}P\{^1H\}$  NMR-spectra of  $10[OTf]_2$  in  $CD_3CN$  at 340 K (top), 300 K (middle) and 240 K (bottom).

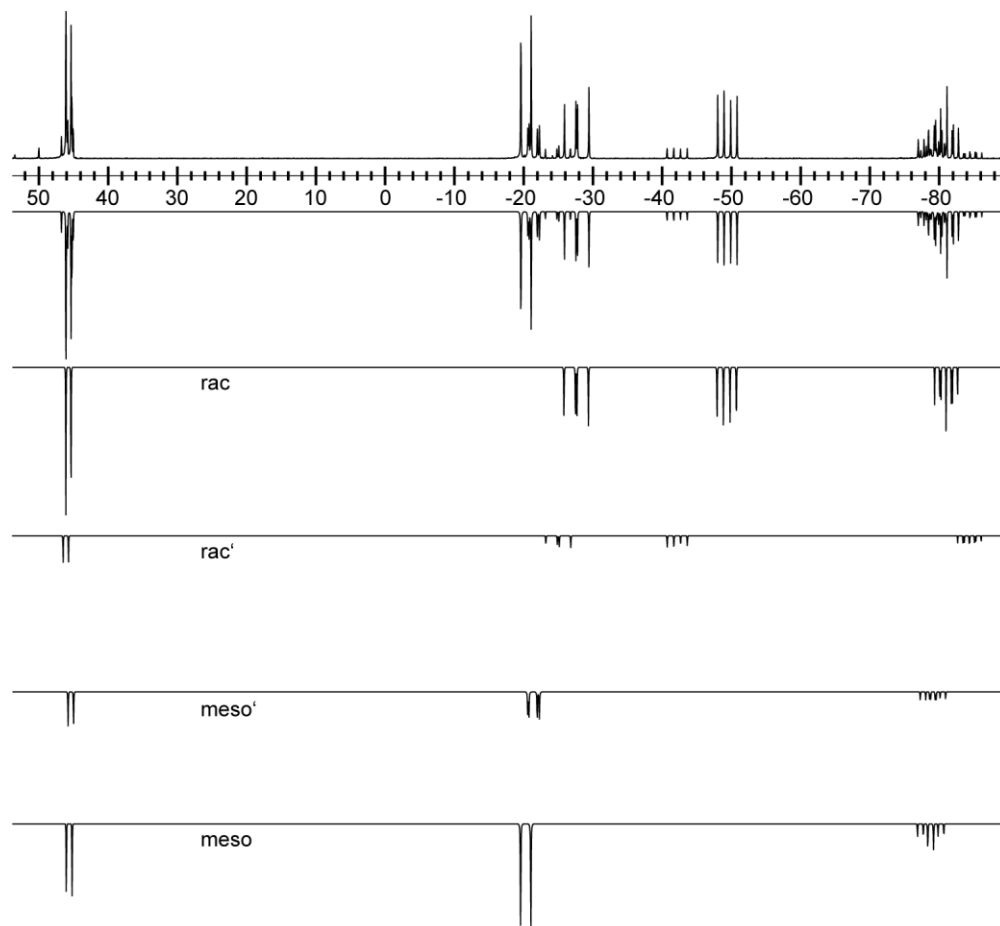

**Figure S69:**  $^{31}\text{P}\{^1\text{H}\}$  NMR-spectra of  $10[\text{OTf}]_2$  in  $\text{CD}_2\text{Cl}_2$  190 K; experimental (upward) and fitted spectra of the *rac* and *meso* isomers (downward); parameters of the spin systems are given in **Table S 2**.

**Table S 2:** Iteratively generated parameters for the  $^{31}\text{P}\{^1\text{H}\}$  NMR resonances of  $\mathbf{10}[\text{OTf}]_2$ .

| Isomer       |                    | Iterated parameter          | Value      |
|--------------|--------------------|-----------------------------|------------|
| <b>rac</b>   | chemical shift     | $\delta(\text{P}_A)$        | -81.14 ppm |
|              |                    | $\delta(\text{P}_M)$        | -49.42 ppm |
|              |                    | $\delta(\text{P}_N)$        | -27.32 ppm |
|              |                    | $\delta(\text{P}_X)$        | 45.71 ppm  |
|              | line width         | $\nu_A$                     | 5.5 Hz     |
|              |                    | $\nu_M$                     | 7.6 Hz     |
|              |                    | $\nu_N$                     | 7.6 Hz     |
|              |                    | $\nu_X$                     | 4.6 Hz     |
|              | coupling constants | $^1J(\text{P}_A\text{P}_M)$ | -148.5 Hz  |
|              |                    | $^1J(\text{P}_A\text{P}_N)$ | -269.4 Hz  |
|              |                    | $^2J(\text{P}_A\text{P}_X)$ | 120.3 Hz   |
|              |                    | $^2J(\text{P}_M\text{P}_N)$ | 303.3 Hz   |
|              |                    | $^3J(\text{P}_M\text{P}_X)$ | 1.5 Hz     |
|              |                    | $^3J(\text{P}_N\text{P}_X)$ | 2.8 Hz     |
| <b>rac'</b>  | chemical shift     | $\delta(\text{P}_A)$        | -84.46 ppm |
|              |                    | $\delta(\text{P}_M)$        | -42.14 ppm |
|              |                    | $\delta(\text{P}_N)$        | -25.04 ppm |
|              |                    | $\delta(\text{P}_X)$        | 46.33 ppm  |
|              | line width         | $\nu_A$                     | 6.5 Hz     |
|              |                    | $\nu_M$                     | 8.9 Hz     |
|              |                    | $\nu_N$                     | 9.8 Hz     |
|              |                    | $\nu_X$                     | 6.2 Hz     |
|              | coupling constants | $^1J(\text{P}_A\text{P}_M)$ | -156.1 Hz  |
|              |                    | $^1J(\text{P}_A\text{P}_N)$ | -269.7 Hz  |
|              |                    | $^2J(\text{P}_A\text{P}_X)$ | 125.1 Hz   |
|              |                    | $^2J(\text{P}_M\text{P}_N)$ | 315.1 Hz   |
|              |                    | $^3J(\text{P}_M\text{P}_X)$ | 0 Hz       |
|              |                    | $^3J(\text{P}_N\text{P}_X)$ | 0 Hz       |
| <b>meso'</b> | chemical shift     | $\delta(\text{P}_A)$        | -79.18 ppm |
|              |                    | $\delta(\text{P}_M)$        | -21.56 ppm |
|              |                    | $\delta(\text{P}_N)$        | -21.33 ppm |
|              |                    | $\delta(\text{P}_X)$        | 45.42 ppm  |
|              | line width         | $\nu_A$                     | 9.4 Hz     |
|              |                    | $\nu_M$                     | 11.2 Hz    |
|              |                    | $\nu_N$                     | 10.2 Hz    |
|              |                    | $\nu_X$                     | 6.9 Hz     |
|              | coupling constants | $^1J(\text{P}_A\text{P}_M)$ | -244.3 Hz  |
|              |                    | $^1J(\text{P}_A\text{P}_N)$ | -220.6 Hz  |
|              |                    | $^2J(\text{P}_A\text{P}_X)$ | 128.6 Hz   |
|              |                    | $^2J(\text{P}_M\text{P}_N)$ | 0 Hz       |
|              |                    | $^3J(\text{P}_M\text{P}_X)$ | 0 Hz       |
|              |                    | $^3J(\text{P}_N\text{P}_X)$ | 3.8 Hz     |
| <b>meso</b>  | chemical shift     | $\delta(\text{P}_A)$        | -78.88 ppm |
|              |                    | $\delta(\text{P}_M)$        | -20.37 ppm |
|              |                    | $\delta(\text{P}_X)$        | 45.63 ppm  |
|              | line width         | $\nu_A$                     | 10.8 Hz    |
|              |                    | $\nu_M$                     | 9.2 Hz     |
|              |                    | $\nu_X$                     | 4.0 Hz     |
|              | coupling constants | $^1J(\text{P}_A\text{P}_M)$ | -240.0 Hz  |
|              |                    | $^2J(\text{P}_A\text{P}_X)$ | 134.9 Hz   |
|              |                    | $^3J(\text{P}_M\text{P}_X)$ | 4.1 Hz     |
|              |                    |                             |            |

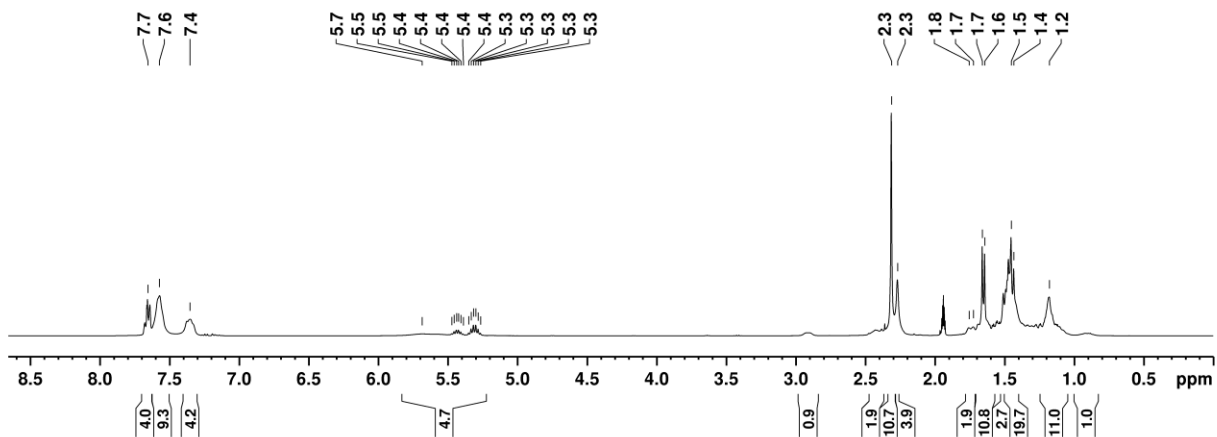

Figure S70:  $^1\text{H}$  NMR-spectrum of  $\mathbf{10}[\text{OTf}]_2$  in  $\text{CD}_3\text{CN}$  at 300 K.

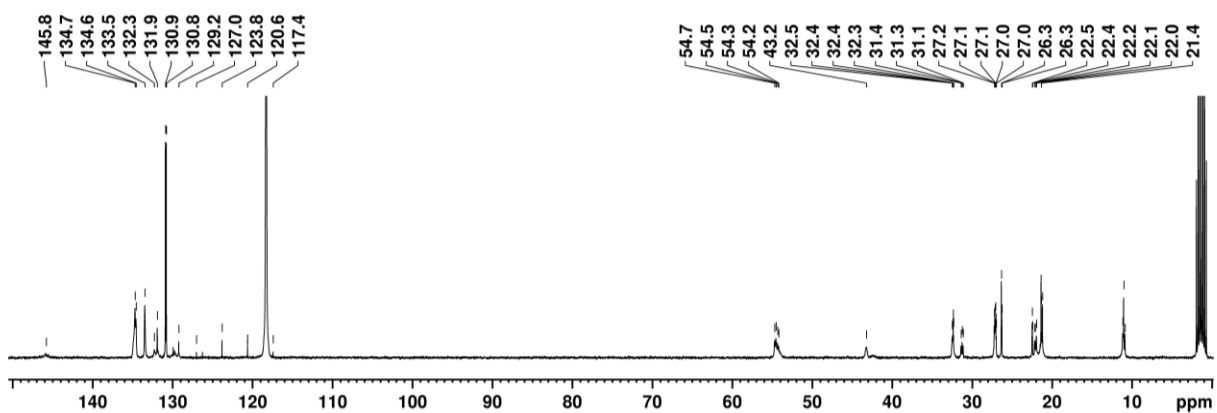

Figure S71:  $^{13}\text{C}\{^1\text{H}\}$  NMR-spectrum of  $\mathbf{10}[\text{OTf}]_2$  in  $\text{CD}_3\text{CN}$  at 300 K.

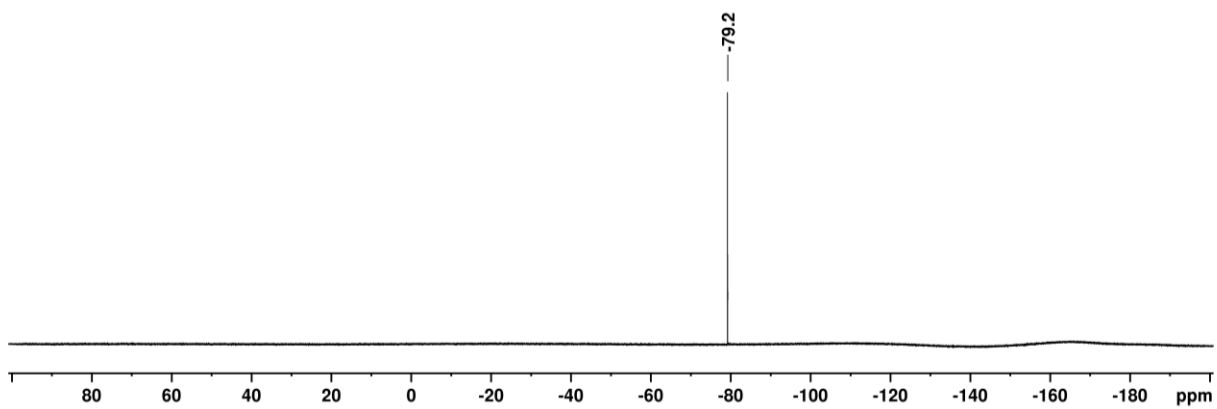

Figure S72:  $^{19}\text{F}$  NMR-spectrum of  $\mathbf{10}[\text{OTf}]_2$  in  $\text{CD}_3\text{CN}$  at 300 K.

### 2.5.3. Preparation of [(LcPCy)<sub>2</sub>P][OTf] (**11**[OTf])

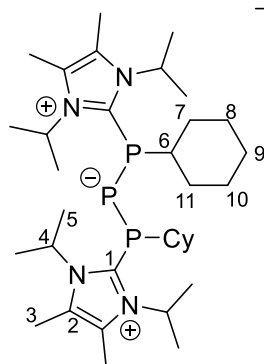

A solution of **IPr** (1,3-diisopropyl-4,5-dimethyl-1*H*-imidazol-2-ylidene) (0.9 equiv., 30 mg, 0.17 mmol) in 1 mL *o*-C<sub>6</sub>H<sub>4</sub>F<sub>2</sub> is slowly added to a suspension of (LcPCy)<sub>3</sub>P[OTf]<sub>3</sub> **6a**[OTf]<sub>3</sub> (1 equiv., 310 mg, 0.19 mmol) in 2 mL *o*-C<sub>6</sub>H<sub>4</sub>F<sub>2</sub>. The resulting suspension is stirred for 60 min. Subsequently, the mixture is filtered and all volatiles are removed *in vacuo*. The residue is dissolved in 2 mL C<sub>6</sub>H<sub>5</sub>F and the suspension is filtered again to remove **12**[OTf]<sub>2</sub>. Addition of *n*-pentane leads to precipitation of a red oil and yellow crystalline solid, which are stirred in cold (−30°C) THF. The suspension is filtered and the yellow residue washed with 2x0.5 mL

cold (−30°C) THF and 2x0.5 mL Et<sub>2</sub>O. Removal of all volatiles affords the product as a yellow crystalline solid. Suitable crystals for X-ray diffraction analysis can be obtained by diffusion of *n*-pentane into a saturated CH<sub>2</sub>Cl<sub>2</sub>/C<sub>6</sub>H<sub>5</sub>F (v/v= 1:1) solution at −30°C.

**Yield:** 115 mg (81%); **Raman** (100 mW, 100 scans, 298 K, [cm<sup>−1</sup>]): 2969 (60), 2939 (98), 2889 (44), 2847 (59), 1626 (25), 1444 (70), 1420 (53), 1401 (31), 1355 (68), 1293 (100), 1265 (25), 1191 (19), 1170 (12), 1152 (19), 1135 (15), 1084 (14), 1033 (40), 999 (15), 886 (23), 850 (15), 816 (15), 783 (21), 751 (19), 733 (31), 705 (18), 583 (16), 573 (18), 508 (26), 483 (18), 459 (20), 429 (18); **IR** (ATR, 298 K, [cm<sup>−1</sup>]): 2976 (vw), 2920 (w), 2847 (w), 1625 (vw), 1449 (w), 1393 (w), 1375 (w), 1338 (vw), 1269 (vs), 1222 (m), 1169 (w), 1137 (s), 1112 (w), 1070 (vw), 1031 (s), 999 (w), 904 (w), 882 (vw), 849 (vw), 781 (vw), 751 (w), 733 (w), 703 (vw), 636 (vs), 571 (w), 547 (vw), 516 (m), 482 (m), 445 (w), 417 (w); **<sup>1</sup>H NMR** (CD<sub>2</sub>Cl<sub>2</sub>, 300 K, in ppm) δ = 0.84 - 0.95 (1H, br, H11), 1.00 - 1.30 (9H, m, H7/H9/H11), 1.45 - 1.62 (24H, m, H5), 1.63 - 1.90 (10H, br, H6/H8/H10), 2.05 - 2.12 (1H, br, H11), 2.27 (6H, s, H3), 2.32 (6H, s, H3), 2.40 - 2.49 (1H, br, H6), 5.36 (2H, br, H4), 5.95 (2H, br, H4); **<sup>13</sup>C{<sup>1</sup>H} NMR** (CD<sub>2</sub>Cl<sub>2</sub>, 300 K, in ppm) δ = 10.69 (4C, s, C3), 21.48 (8C, s, C5), 26.63 (1C, s, C9), 26.67 (1C, s, C9), 26.97 - 27.33 (4C, m, C8/C10), 29.78 - 30.50 (2C, m, C11), 32.62 - 33.00 (2C, br, C7), 41.16 - 42.20 (2C, br, C6), 52.00 - 53.21 (4C, br, C4), 121.41 (1C, q, <sup>1</sup>J(CF) = −321 Hz, OTf), 127.50 - 129.00 (4C, br, C2) 153.00 - 154.44 (2C, br, C1); **<sup>19</sup>F{<sup>1</sup>H} NMR** (CD<sub>2</sub>Cl<sub>2</sub>, 300 K, in ppm): δ = −79.92 (s); **<sup>31</sup>P{<sup>1</sup>H} NMR** (CD<sub>2</sub>Cl<sub>2</sub>, 300 K, in ppm): AX<sub>2</sub> spin systems: *meso* isomer: δ(P<sub>A</sub>) = −135.2 ppm, δ(P<sub>X</sub>) = −3.2 ppm, <sup>1</sup>J(PP) = −316 Hz; *rac* isomer: δ(P<sub>A</sub>) = −130.6 ppm, δ(P<sub>X</sub>) = −6.9 ppm, <sup>1</sup>J(PP) = −315 Hz at room temperature, low temperature see below; **elemental analysis:** calculated for **11**[OTf]·0.33 CH<sub>2</sub>Cl<sub>2</sub> C<sub>35.33</sub>H<sub>62.66</sub>F<sub>3</sub>N<sub>4</sub>O<sub>3</sub>P<sub>3</sub>Cl<sub>0.66</sub>S: N 7.03, C 53.24, H 7.92, S 4.02; found: N 6.64, C 53.54, H 7.94, S 3.76.

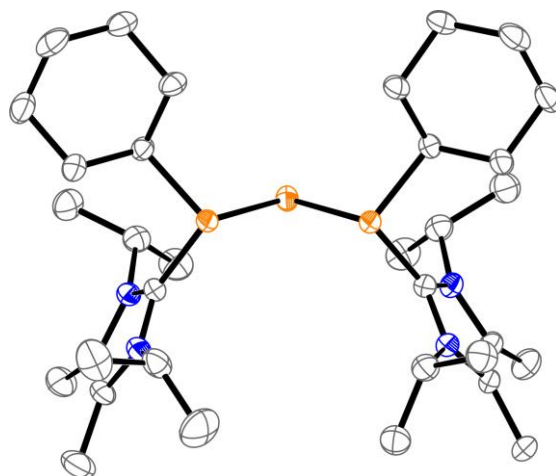

**Figure S73:** Molecular structure of cation **11**<sup>+</sup> in **11**[OTf]·CH<sub>2</sub>Cl<sub>2</sub> (hydrogen atoms, solvate molecules, and anions are omitted for clarity and ellipsoids are set at 50% probability).

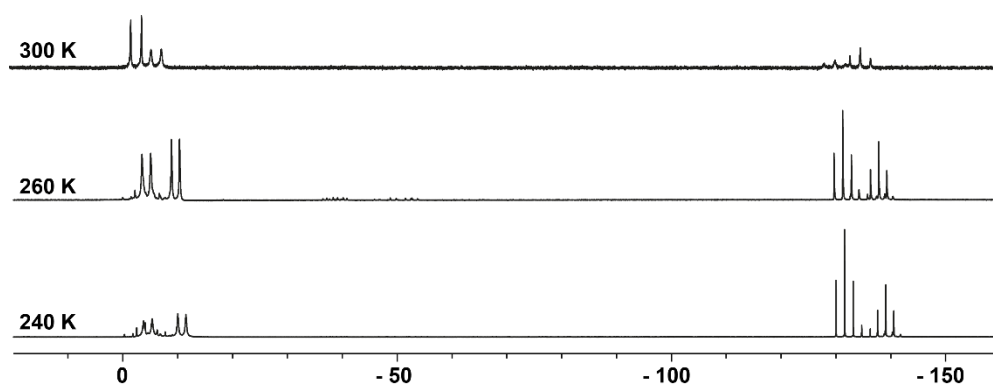

**Figure S74:** <sup>31</sup>P{<sup>1</sup>H} NMR-spectra of **11**[OTf] in CD<sub>2</sub>Cl<sub>2</sub> at 300 K (top), 260 K (middle) and 240 K (bottom).

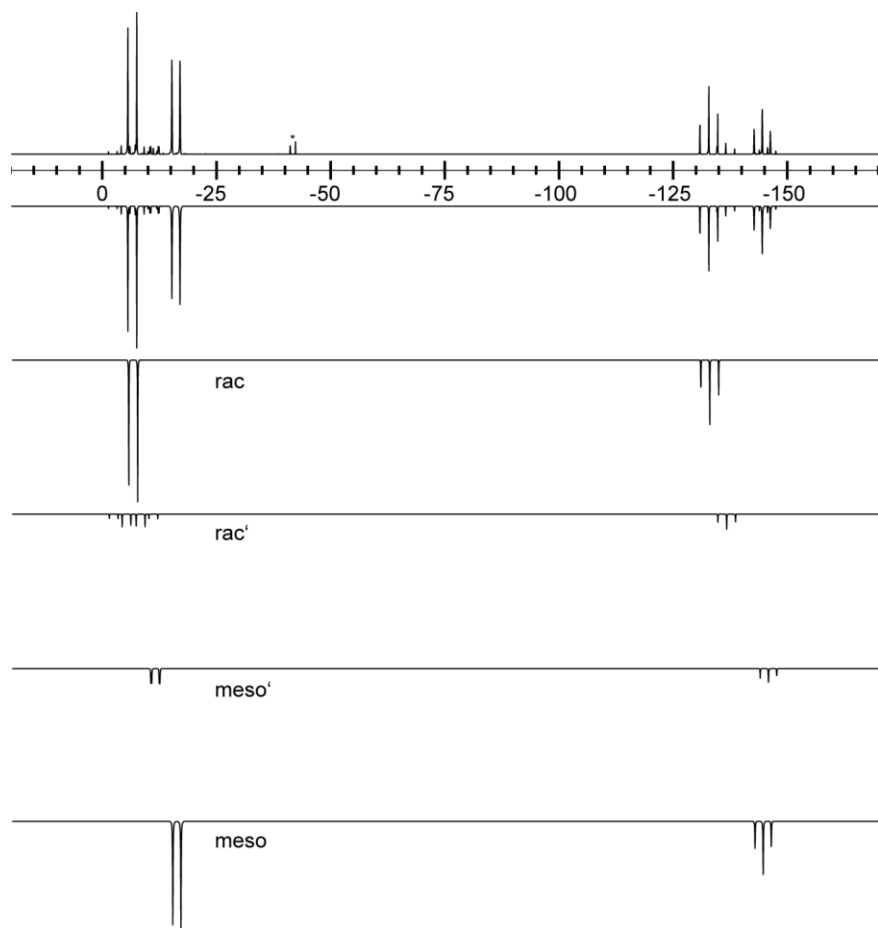

**Figure S75:**  $^{31}\text{P}\{^1\text{H}\}$  NMR-spectra of **11**[OTf] in  $\text{CD}_2\text{Cl}_2$  190 K; experimental (upward) and fitted spectra of the *rac* and *meso* isomers (downward); parameters of the spin systems are given in **Table S 3**.

**Table S 3:** Iteratively generated parameters for the  $^{31}\text{P}\{^1\text{H}\}$  NMR resonances of **11**[OTf].

| Isomer                                    |                                           | Iterated parameter                        | Value       |
|-------------------------------------------|-------------------------------------------|-------------------------------------------|-------------|
| <b>rac</b>                                | chemical shift                            | $\delta(\text{P}_\text{A})$               | -132.82 ppm |
|                                           |                                           | $\delta(\text{P}_\text{X})$               | -6.60 ppm   |
|                                           | line width                                | $\nu_\text{A}$                            | 8.7 Hz      |
|                                           |                                           | $\nu_\text{X}$                            | 8.7 Hz      |
|                                           | coupling constants                        | $^1J(\text{P}_\text{A}\text{P}_\text{X})$ | -315.8 Hz   |
| <b>rac'</b>                               | chemical shift                            | $\delta(\text{P}_\text{A})$               | -136.5 ppm  |
|                                           |                                           | $\delta(\text{P}_\text{X})$               | -9.26 ppm   |
|                                           |                                           | $\delta(\text{P}_\text{Y})$               | -4.08 ppm   |
|                                           | line width                                | $\nu_\text{A}$                            | 8.2 Hz      |
|                                           |                                           | $\nu_\text{X}$                            | 8.2 Hz      |
|                                           |                                           | $\nu_\text{Y}$                            | 8.2 Hz      |
|                                           | coupling constants                        | $^1J(\text{P}_\text{A}\text{P}_\text{X})$ | -313.9 Hz   |
| $^1J(\text{P}_\text{A}\text{P}_\text{Y})$ |                                           | -310.8 Hz                                 |             |
| $^2J(\text{P}_\text{Y}\text{P}_\text{X})$ |                                           | 454.0 Hz                                  |             |
| <b>meso'</b>                              | chemical shift                            | $\delta(\text{P}_\text{A})$               | -145.7 ppm  |
|                                           |                                           | $\delta(\text{P}_\text{X})$               | -11.5 ppm   |
|                                           |                                           | $\delta(\text{P}_\text{Y})$               | -11.4 ppm   |
|                                           | line width                                | $\nu_\text{A}$                            | 8.2 Hz      |
|                                           |                                           | $\nu_\text{X}$                            | 8.2 Hz      |
|                                           |                                           | $\nu_\text{Y}$                            | 8.2 Hz      |
|                                           | coupling constants                        | $^1J(\text{P}_\text{A}\text{P}_\text{X})$ | -289.0 Hz   |
| $^1J(\text{P}_\text{A}\text{P}_\text{Y})$ |                                           | -297.7 Hz                                 |             |
| $^2J(\text{P}_\text{Y}\text{P}_\text{X})$ |                                           | 6.2 Hz                                    |             |
| <b>meso</b>                               | chemical shift                            | $\delta(\text{P}_\text{A})$               | -144.5 ppm  |
|                                           |                                           | $\delta(\text{P}_\text{X})$               | -.16.2 ppm  |
|                                           | line width                                | $\nu_\text{A}$                            | 16.1 Hz     |
|                                           |                                           | $\nu_\text{X}$                            | 16.1 Hz     |
| coupling constants                        | $^1J(\text{P}_\text{A}\text{P}_\text{M})$ | -288.1 Hz                                 |             |



#### 2.5.4. Preparation of [(Lc)<sub>2</sub>PCy][OTf]<sub>2</sub> (**12**[OTf]<sub>2</sub>)

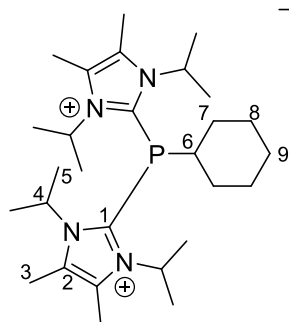

A solution of 50 mg CyPCL<sub>2</sub> (1 equiv., 0.27 mmol) in 2 mL C<sub>6</sub>H<sub>5</sub>F is added to a solution of 217 mg L<sub>C</sub>SiMe<sub>3</sub>OTf (**1**[OTf], 2 equiv., 0.55 mmol) in 4 mL C<sub>6</sub>H<sub>5</sub>F. The colorless solution is stirred 16 h days at 80°C. Upon cooling to room temperature, a white precipitate is formed, which is filtered and washed with 3x1 mL C<sub>6</sub>H<sub>5</sub>F. Drying *in vacuo* affords the product as an off-white powder. Suitable crystals for X-ray diffraction analysis can be obtained by diffusion of Et<sub>2</sub>O into a saturated CH<sub>3</sub>CN solution at -30°C.

**Yield:** 149 mg (71%); **m.p.** 231.5°C (dec.); **Raman** (100 mW, 100 scans, 298 K, [cm<sup>-1</sup>]): 3064 (12), 2991 (44), 2950 (100), 2862 (30), 1614 (28), 1449 (43), 1407 (46), 1349 (46), 1276 (78), 1224 (15), 1153 (25), 1032 (70), 1001 (17), 884 (20), 785 (15), 752 (28), 584 (15), 572 (18), 545 (16), 463 (16), **IR** (ATR, 298 K, [cm<sup>-1</sup>]): 2986 (vw), 2935 (vw), 2860 (vw), 1610 (vw), 1490 (vw), 1454 (vw), 1392 (w), 1380 (w), 1358 (vw), 1261 (vs), 1222 (m), 1138 (s), 1115 (m), 1085 (w), 1030 (vs), 999 (w), 979 (vw), 903 (vw), 805 (vw), 791 (vw), 766 (w), 752 (w), 691 (vw), 635 (vs), 571 (w), 543 (w), 516 (m), 476 (w), 456 (w), 436 (vw); **<sup>1</sup>H NMR** (CD<sub>3</sub>CN, 300 K, in ppm) δ = 1.34 - 1.44 (1H, m, H9), 1.49 (24H, d, <sup>3</sup>J(HH) = 6.8 Hz, H5), 1.53 - 1.61 (4H, m, H7/H8), 1.68 - 1.81 (3H, m, H7/H9), 1.81 - 1.89 (2H, m, H9), 2.42 (12H, s, H3), 3.28 - 3.38 (1H, m, H6), 4.97 (4H, br, H4); **<sup>13</sup>C{<sup>1</sup>H} NMR** (CD<sub>3</sub>CN, 300 K, in ppm) δ = 11.64 (4C, s, C3), 21.19 (4C, s, C5), 21.50 (4C, s, C4), 25.92 (1C, d, <sup>4</sup>J(CP) = 2 Hz, C9), 26.19 (1C, d, <sup>3</sup>J(CP) = 16 Hz, C8), 31.52 (1C, d, <sup>2</sup>J(CP) = 21 Hz, C7), 36.46 (1C, d, <sup>1</sup>J(CP) = -17 Hz, C6), 54.57 (2C, s, C4), 54.70 (2C, s, C4), 122.20 (1C, q, <sup>1</sup>J(CF) = -321 Hz, OTf), 134.65 (4C, s, C2), 136.13 (2C, d, <sup>1</sup>J(CP) = -53 Hz, C1); **<sup>19</sup>F{<sup>1</sup>H} NMR** (CD<sub>3</sub>CN, 300 K, in ppm): δ = -79.20 (s); **<sup>31</sup>P{<sup>1</sup>H} NMR** (CD<sub>3</sub>CN, 300 K, in ppm): δ = -38.2; **elemental analysis:** calculated for **12**[OTf]<sub>2</sub>·0.33 C<sub>6</sub>H<sub>5</sub>F C<sub>32</sub>H<sub>52.66</sub>F<sub>6.33</sub>N<sub>4</sub>O<sub>6</sub>PS<sub>2</sub>: N 6.96, C 47.55, H 6.60, S 7.97; found: N 6.92, C 47.73, H 6.53, S 7.70.

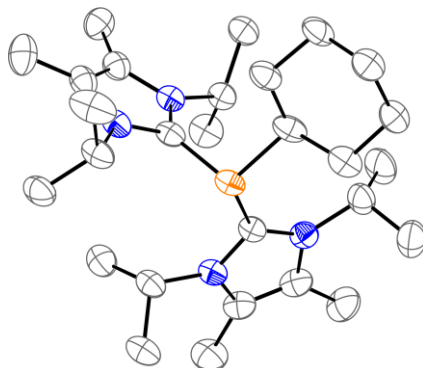

**Figure S79:** Molecular structure of cation **12**<sup>2+</sup> in **12**[OTf]<sub>2</sub>·CH<sub>3</sub>CN (hydrogen atoms, solvate molecules, and anions are omitted for clarity and ellipsoids are set at 50% probability). Selected bond lengths [Å] and angles [°]: P1–C1 1.837(3), P1–C2 1.840(3), P1–C3 1.860(4), C1–P1–C3 100.94(16).

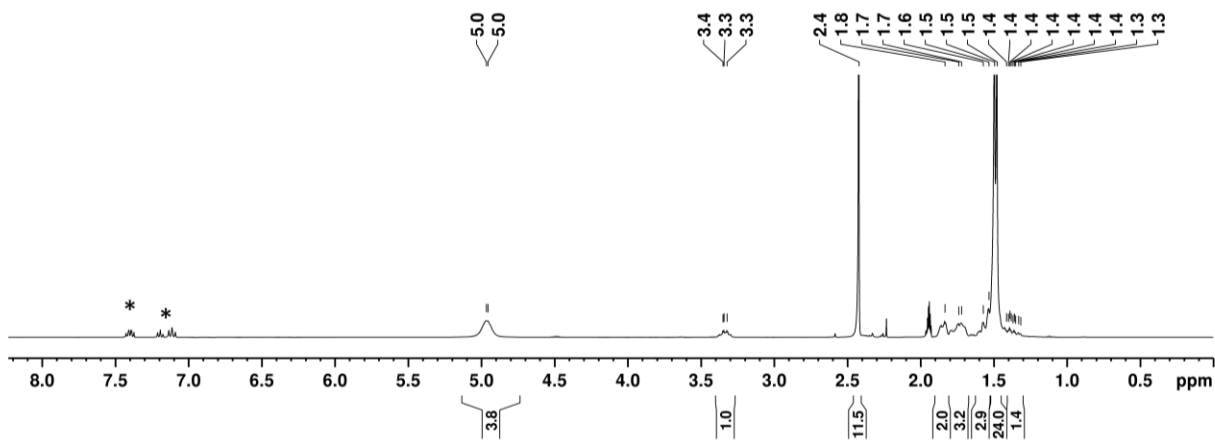

Figure S80:  $^1\text{H}$  NMR-spectrum of  $\mathbf{12}[\text{OTf}]_2$  in  $\text{CD}_3\text{CN}$  at 300 K; signals of residual  $\text{C}_6\text{H}_5\text{F}$  between 7 and 7.5 ppm.

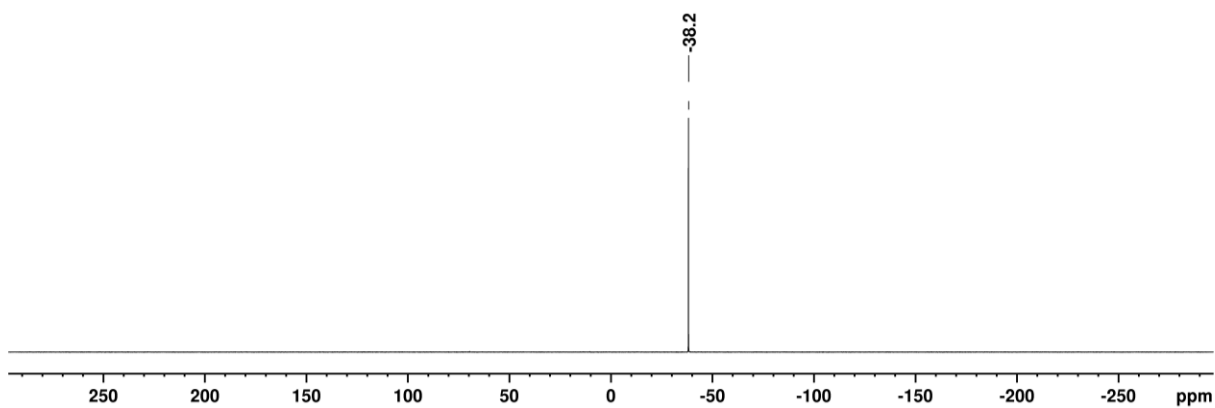

Figure S81:  $^{31}\text{P}\{^1\text{H}\}$  NMR-spectrum of  $\mathbf{12}[\text{OTf}]_2$  in  $\text{CD}_3\text{CN}$  at 300 K.

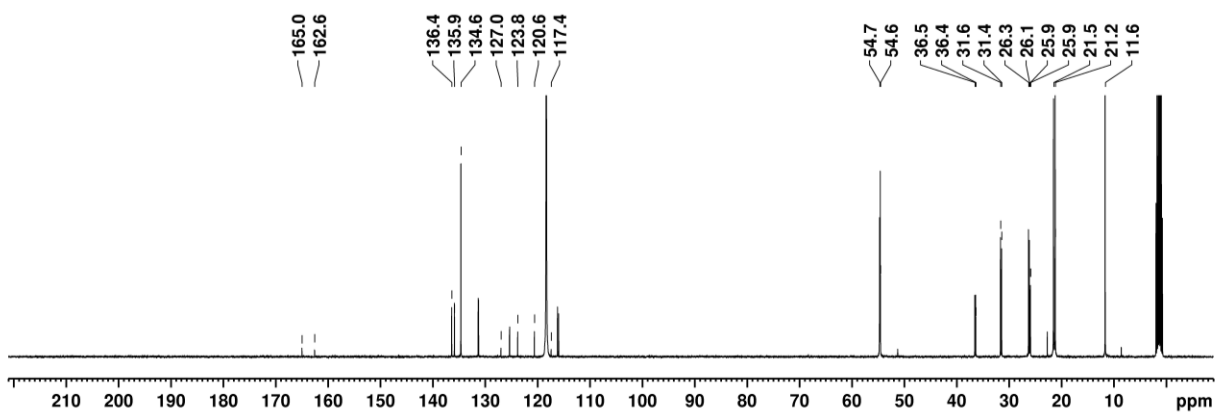

Figure S82:  $^{13}\text{C}\{^1\text{H}\}$  NMR-spectrum of  $\mathbf{12}[\text{OTf}]$  in  $\text{CD}_3\text{CN}$  at 300 K.

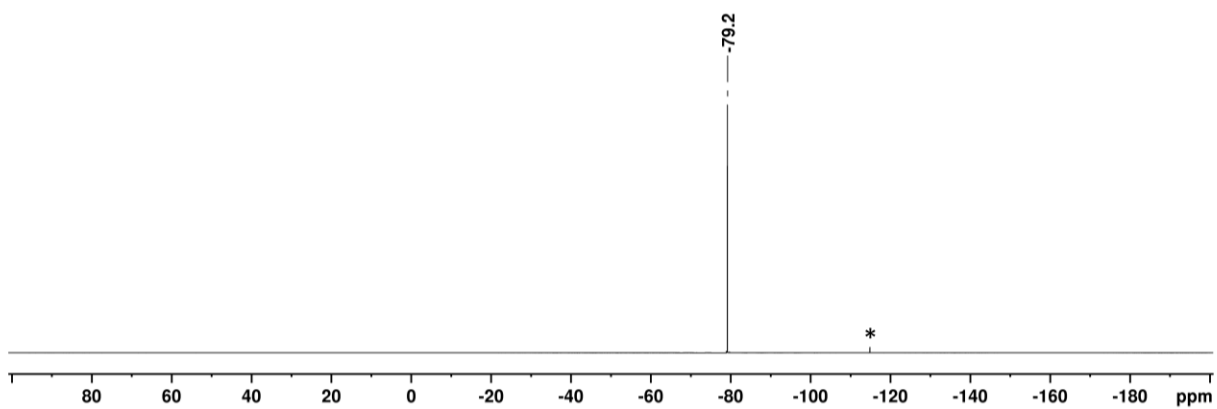

**Figure S83:**  $^{19}\text{F}$  NMR-spectrum of  $12[\text{OTf}]_2$  in  $\text{CD}_3\text{CN}$  at 300 K; signals of residual  $\text{C}_6\text{H}_5\text{F}$  at -114.9 ppm.

### 2.5.5. Reaction of **6a**[OTf]<sub>3</sub> with Ph<sub>4</sub>PCl

**6a**[OTf]<sub>3</sub> (300 mg, 1 equiv., 0.19 mmol) and Ph<sub>4</sub>PCl (80 mg, 1 equiv. 0.19 mmol) were dissolved in 5 mL of cold (-30°C) acetonitrile. The mixture was allowed to warm to room temperature and subsequently stirred for 1 h. After evaporating to dryness, the solids were washed with 2 mL of toluene and dried *in vacuo*. The remaining colorless residue was taken up in 1 mL of C<sub>6</sub>H<sub>5</sub>F and the so obtained yellow solution was used for NMR studies.

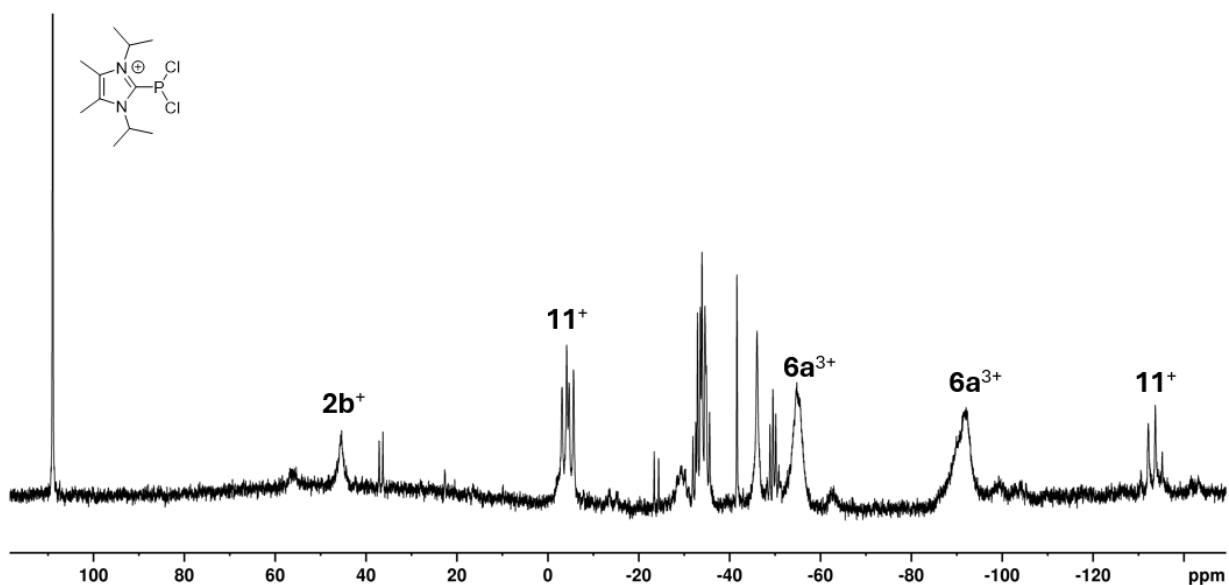

**Figure S 84:** <sup>31</sup>P NMR spectrum (300K) of the reaction mixture of **6a**[OTf]<sub>3</sub> with Ph<sub>4</sub>PCl in C<sub>6</sub>H<sub>5</sub>F (C<sub>6</sub>D<sub>6</sub> ref.).

### 3. Computational Investigations

The geometries and energies of all systems included in this study were fully optimized at the RI-BP86-D4/def2-TZVP level of theory without symmetry constraints. The calculations have been performed by using the program TURBOMOLE version 7.0.<sup>3</sup> For the calculations we have used the BP86 functional<sup>4</sup> with the D4 correction<sup>5</sup> for dispersion. In order to reproduce solvent effects, we have used the conductor-like screening model COSMO<sup>6</sup>, which is a variant of the dielectric continuum solvation models. The minimum nature of the complexes and compounds have been confirmed by doing frequency calculations. The NMR spectra were computed using the GIAO method as implemented in ORCA 5.0<sup>7</sup>. The conformational searches of the rotamers were computed using the conformer-rotamer ensemble sorting tool<sup>8</sup> (CREST).

### 3.1. Conformer Search for 2b[OTf]

Initially, a conformer search for compound **2b**<sup>+</sup> was conducted using the Conformer-Rotamer Ensemble Sampling Tool (CREST), a tool based on the xTB method developed by Grimme<sup>8</sup>. Forty rotamers were identified by CREST, with energies ranging from 0 to 6 kcal/mol. These rotamers were subsequently optimized at the BP86-D4/def2-TZVP level of theory, resulting in convergence from the initial 40 structures down to only 4 distinct rotamers, depicted in **Figure S85**. This reduction indicates that only four conformations represent true energy minima. Notably, two of these rotamers are isoenergetic, exhibiting the lowest energies and aligning with those observed in the solid state. The remaining two isomers, with energies  $\geq 5$  kcal/mol higher, are not detected in the <sup>31</sup>P-NMR spectrum due to their negligible population (< 0.1%). The analysis revealed that rotation of the isopropyl groups, highlighted in yellow in **Figure S85**, marginally affects stabilization energy, whereas rotation of the isopropyl groups marked in green significantly influences their relative energy

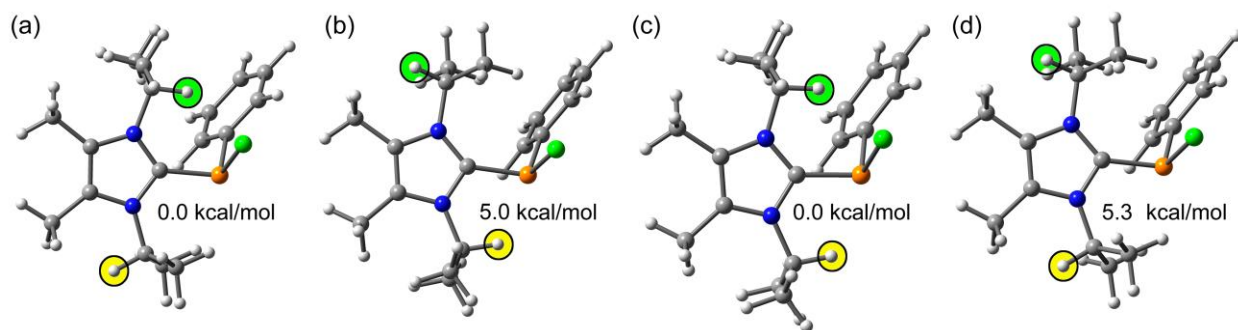

**Figure S85:** Optimized geometries of the four rotamers of compound **2b**<sup>+</sup> and their relative energies

The rotation barrier to interconvert the isoenergetic isomers has been computed in CH<sub>2</sub>Cl<sub>2</sub>, and it is 10.2 kcal/mol, that is consistent with a rapid interconversion at 300 K compared to the NMR scale. The <sup>31</sup>P NMR spectrum of **2b**<sup>+</sup> exhibits two singlet resonances at 240 K and a broad singlet resonance at 300 K. The Gutowsky–Holm equation<sup>9</sup> allows a rough estimation of  $\Delta G^\ddagger$ .

$k_B$  Boltzmann constant  $1.38064852 \cdot 10^{-23} \text{ m}^2 \cdot \text{kg} \cdot \text{s}^{-2} \cdot \text{K}^{-1}$

$h$  Planck constant  $6.62607004 \cdot 10^{-34} \text{ m}^2 \cdot \text{kg} \cdot \text{s}^{-1}$

$$k_{T_c} = \Delta\nu \cdot \frac{\pi}{\sqrt{2}}$$
$$\Delta G^\ddagger = RT \cdot \ln \left( \frac{k_B T}{k_{T_c} h} \right)$$

Coalescence occurs at 280 K and the signals are separated by 618.3 Hz at low temperature. Therefore an energy barrier  $\Delta G^\ddagger$  of 51.6 kJ·mol<sup>-1</sup> or 12.3 kcal·mol<sup>-1</sup> can be attributed to the process, which is in close agreement to the theoretical value of 10.2·kcal mol<sup>-1</sup>. Remarkably, the chemical shift difference between both isomers  $\Delta\delta(\text{P})$  is 3.0 ppm, that strongly agrees with the experimental difference (3.1 ppm).

### 3.2. Frontier Molecular Orbitals and WBI of $7b[OTf]_2$

In order to gain a better understanding of the bonding situation in  $7b[OTf]_2$ , we conducted DFT calculations at the RI-BP86-D4/def2-TZVP level of theory.

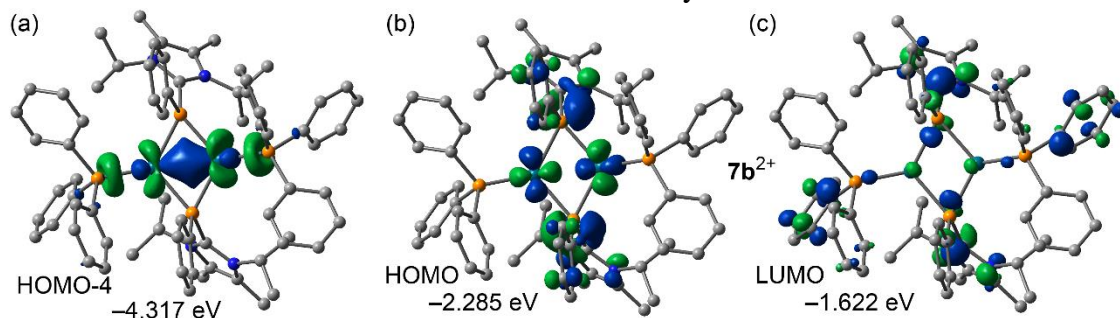

**Figure S86:** Frontier molecular orbitals of  $7b^{2+}$ .

The frontier molecular orbitals of  $7b^{2+}$  are depicted in **Figure S86**. In the HOMO, there is a significant contribution of the d-atomic orbitals of the metal centers but in anti-bonding phase. Interestingly, we have found the bonding phase of such orbitals in the HOMO-4. Additionally, the LUMO is predominantly located at the aromatic rings. The calculated Wiberg Bond Index of the PdPd bond is 0.24, indicating only a weak interaction.

### 3.3. Cartesian Coordinates

#### 2b\_anti

|    |            |            |            |
|----|------------|------------|------------|
| Cl | 6.8946705  | 3.3373640  | 11.9872396 |
| P  | 5.9015051  | 4.2927192  | 10.4250781 |
| N  | 7.3076066  | 6.7506462  | 11.1324634 |
| N  | 5.1243927  | 6.8994698  | 11.1601756 |
| C  | 6.1594966  | 6.0500733  | 10.9192642 |
| C  | 6.9972750  | 8.0480791  | 11.5043695 |
| C  | 5.6180865  | 8.1403989  | 11.5174262 |
| C  | 8.6721164  | 6.1537111  | 11.0101903 |
| H  | 8.4747257  | 5.1008873  | 10.7905212 |
| C  | 9.4391436  | 6.7354626  | 9.8247482  |
| H  | 8.8425620  | 6.6877222  | 8.9058909  |
| H  | 10.3436969 | 6.1332772  | 9.6686696  |
| H  | 9.7593392  | 7.7710758  | 9.9896938  |
| C  | 9.4256113  | 6.2125900  | 12.3375725 |
| H  | 9.7609776  | 7.2253824  | 12.5896712 |
| H  | 10.3199561 | 5.5814994  | 12.2562551 |
| H  | 8.8126586  | 5.8215918  | 13.1599174 |
| C  | 7.9824972  | 9.1099347  | 11.8526304 |
| H  | 8.3674646  | 8.9866368  | 12.8749551 |
| H  | 7.4989707  | 10.0916850 | 11.7984870 |
| H  | 8.8376614  | 9.1256621  | 11.1689132 |
| C  | 4.7596930  | 9.3094814  | 11.8501612 |
| H  | 4.1035162  | 9.5912302  | 11.0141971 |
| H  | 5.3876739  | 10.1759430 | 12.0833910 |
| H  | 4.1280966  | 9.1181841  | 12.7296490 |
| C  | 7.0806858  | 4.1789480  | 9.0317370  |
| C  | 8.0479511  | 3.1721369  | 8.9270857  |
| H  | 8.2128851  | 2.4798503  | 9.7531494  |
| C  | 8.8094884  | 3.0613637  | 7.7619113  |
| H  | 9.5655149  | 2.2794477  | 7.6868244  |
| C  | 8.6016974  | 3.9397070  | 6.6969399  |
| H  | 9.1960976  | 3.8462912  | 5.7880955  |
| C  | 7.6237856  | 4.9336152  | 6.7928918  |
| H  | 7.4529528  | 5.6175465  | 5.9611907  |
| C  | 6.8614536  | 5.0533908  | 7.9537666  |
| H  | 6.0968073  | 5.8310970  | 8.0159794  |
| C  | 3.6623598  | 6.5925569  | 11.0926838 |
| H  | 3.1933699  | 7.5458704  | 11.3630632 |
| C  | 3.2620212  | 5.5583954  | 12.1452310 |
| H  | 3.6495051  | 4.5599425  | 11.9055693 |
| H  | 2.1667926  | 5.4924445  | 12.1801124 |
| H  | 3.6181047  | 5.8465780  | 13.1428392 |
| C  | 3.2229583  | 6.2441502  | 9.6702449  |
| H  | 3.5551592  | 7.0054051  | 8.9516397  |
| H  | 2.1262819  | 6.2034640  | 9.6370000  |
| H  | 3.6012335  | 5.2626913  | 9.3562137  |

#### 2b\_syn

|    |           |           |            |
|----|-----------|-----------|------------|
| Cl | 6.8025146 | 3.3381423 | 11.9038157 |
| P  | 5.8526960 | 4.3884184 | 10.3772163 |
| N  | 7.3548159 | 6.7641814 | 11.1714289 |
| N  | 5.1745918 | 6.9851217 | 11.1969641 |
| C  | 6.1860942 | 6.1125230 | 10.9306170 |
| C  | 7.0825121 | 8.0561247 | 11.5850567 |
| C  | 5.7055357 | 8.1983572 | 11.5952286 |
| C  | 8.6985872 | 6.1244362 | 11.0357391 |
| H  | 8.4656400 | 5.0867840 | 10.7805752 |

|   |            |            |            |
|---|------------|------------|------------|
| C | 9.4904528  | 6.7173792  | 9.8723879  |
| H | 8.8985954  | 6.7136021  | 8.9491400  |
| H | 10.3782230 | 6.0940167  | 9.7041357  |
| H | 9.8389277  | 7.7384496  | 10.0687068 |
| C | 9.4450908  | 6.1137846  | 12.3682262 |
| H | 9.8084792  | 7.1062636  | 12.6589411 |
| H | 10.3208514 | 5.4592810  | 12.2701714 |
| H | 8.8149630  | 5.7126477  | 13.1725347 |
| C | 8.0980596  | 9.0699569  | 11.9827730 |
| H | 8.4295636  | 8.9225744  | 13.0209462 |
| H | 7.6623135  | 10.0735650 | 11.9183598 |
| H | 8.9829613  | 9.0502269  | 11.3388890 |
| C | 4.9207252  | 9.4010987  | 11.9886495 |
| H | 4.0621811  | 9.5733794  | 11.3307094 |
| H | 5.5595794  | 10.2902293 | 11.9380739 |
| H | 4.5481981  | 9.3233609  | 13.0201110 |
| C | 7.0277540  | 4.2736398  | 8.9801235  |
| C | 7.9665236  | 3.2440908  | 8.8473238  |
| H | 8.1065110  | 2.5198986  | 9.6502712  |
| C | 8.7313661  | 3.1510422  | 7.6825745  |
| H | 9.4649887  | 2.3505590  | 7.5846945  |
| C | 8.5549721  | 4.0702987  | 6.6470495  |
| H | 9.1519803  | 3.9907833  | 5.7385826  |
| C | 7.6041148  | 5.0872381  | 6.7708832  |
| H | 7.4571140  | 5.8028278  | 5.9615468  |
| C | 6.8381480  | 5.1884272  | 7.9309753  |
| H | 6.0937309  | 5.9837540  | 8.0154415  |
| C | 3.7289061  | 6.6366563  | 11.0461808 |
| H | 3.7486285  | 5.5559293  | 10.8452016 |
| C | 3.1218903  | 7.3248445  | 9.8246345  |
| H | 3.0580035  | 8.4141602  | 9.9397218  |
| H | 2.1015983  | 6.9479756  | 9.6752608  |
| H | 3.6997101  | 7.1047904  | 8.9171565  |
| C | 2.9547292  | 6.8540685  | 12.3444752 |
| H | 3.4697375  | 6.3932293  | 13.1975804 |
| H | 1.9725373  | 6.3739300  | 12.2471167 |
| H | 2.7805997  | 7.9139045  | 12.5637443 |

**5b<sup>2+</sup>, Figure 3 (a)**

|   |            |           |            |
|---|------------|-----------|------------|
| P | 1.3104429  | 5.6813718 | 10.4281340 |
| N | 3.1829746  | 4.0071683 | 8.9166455  |
| N | 1.7563359  | 5.1709651 | 7.7249602  |
| C | 2.1400429  | 4.8828484 | 9.0032795  |
| C | 3.4652055  | 3.7558205 | 7.5848719  |
| C | 2.5653348  | 4.4927050 | 6.8329577  |
| C | 3.8975161  | 3.4431838 | 10.1013549 |
| H | 3.3014661  | 3.7999997 | 10.9501356 |
| C | 3.8656913  | 1.9160636 | 10.1200363 |
| H | 2.8514823  | 1.5303395 | 9.9622118  |
| H | 4.2003034  | 1.5755879 | 11.1084832 |
| H | 4.5369830  | 1.4710886 | 9.3777447  |
| C | 5.3063779  | 4.0221173 | 10.2228286 |
| H | 5.9855322  | 3.6407143 | 9.4510032  |
| H | 5.7235712  | 3.7326090 | 11.1960439 |
| H | 5.3019980  | 5.1183717 | 10.1705834 |
| C | 0.6041529  | 6.0658304 | 7.3900643  |
| H | 0.1572483  | 6.2708063 | 8.3740603  |
| C | -0.4429371 | 5.3455398 | 6.5429774  |
| H | -0.1289651 | 5.2073707 | 5.5023675  |
| H | -1.3559873 | 5.9545806 | 6.5297155  |
| H | -0.7002411 | 4.3670620 | 6.9695024  |

|   |            |            |            |
|---|------------|------------|------------|
| C | 1.0840048  | 7.3957261  | 6.8137458  |
| H | 1.7783572  | 7.8972526  | 7.5005457  |
| H | 0.2154787  | 8.0509139  | 6.6663686  |
| H | 1.5766526  | 7.2847986  | 5.8398941  |
| C | 4.5071126  | 2.8205248  | 7.0788342  |
| H | 5.4470772  | 2.8940193  | 7.6354238  |
| H | 4.7261046  | 3.0458530  | 6.0290597  |
| H | 4.1664511  | 1.7760040  | 7.1230496  |
| C | 2.4395203  | 4.5245473  | 5.3494390  |
| H | 1.6709544  | 3.8236873  | 4.9932002  |
| H | 3.3898020  | 4.2261339  | 4.8918072  |
| H | 2.1897180  | 5.5211304  | 4.9712609  |
| C | 0.7538099  | 4.2433645  | 11.4126433 |
| C | 0.5446887  | 2.9860671  | 10.8235765 |
| H | 0.8183823  | 2.8138201  | 9.7826292  |
| C | -0.0386553 | 1.9509224  | 11.5539850 |
| H | -0.2001927 | 0.9817566  | 11.0812824 |
| C | -0.4217644 | 2.1548192  | 12.8809593 |
| H | -0.8766623 | 1.3445684  | 13.4502999 |
| C | -0.2382525 | 3.4086747  | 13.4681142 |
| H | -0.5585926 | 3.5811719  | 14.4960638 |
| C | 0.3345379  | 4.4497246  | 12.7388619 |
| H | 0.4378777  | 5.4278475  | 13.2080866 |
| P | 3.1436952  | 6.3943518  | 11.5919694 |
| N | 1.2728296  | 8.0452359  | 13.1152519 |
| N | 2.6371932  | 6.8168753  | 14.3106418 |
| C | 2.2993479  | 7.1468706  | 13.0322500 |
| C | 0.9588230  | 8.2716872  | 14.4456460 |
| C | 1.8216830  | 7.4947282  | 15.1973573 |
| C | 0.6023525  | 8.6565560  | 11.9269884 |
| H | 1.2021612  | 8.2977432  | 11.0820990 |
| C | 0.6880479  | 10.1815656 | 11.9458489 |
| H | 1.7114149  | 10.5262145 | 12.1353969 |
| H | 0.3880438  | 10.5566371 | 10.9588575 |
| H | 0.0153597  | 10.6322164 | 12.6837562 |
| C | -0.8239075 | 8.1331248  | 11.7610873 |
| H | -1.5067822 | 8.5184462  | 12.5274175 |
| H | -1.2063273 | 8.4653233  | 10.7874431 |
| H | -0.8620285 | 7.0364911  | 11.7799202 |
| C | 3.7642199  | 5.9392699  | 14.7618737 |
| H | 3.7089423  | 6.0069336  | 15.8544535 |
| C | 3.5493878  | 4.4755372  | 14.3802360 |
| H | 3.6427715  | 4.3208035  | 13.2986542 |
| H | 4.3152082  | 3.8684575  | 14.8806008 |
| H | 2.5646356  | 4.1151403  | 14.7017018 |
| C | 5.1144861  | 6.5121711  | 14.3310217 |
| H | 5.2202377  | 7.5611651  | 14.6372017 |
| H | 5.9148511  | 5.9380288  | 14.8158604 |
| H | 5.2609338  | 6.4417919  | 13.2451565 |
| C | -0.0791963 | 9.2148265  | 14.9465605 |
| H | -1.0139462 | 9.1524408  | 14.3798137 |
| H | -0.3131505 | 8.9826447  | 15.9913028 |
| H | 0.2707322  | 10.2563059 | 14.9117697 |
| C | 1.9307364  | 7.3808588  | 16.6772507 |
| H | 2.8934176  | 7.7613626  | 17.0491414 |
| H | 1.1434572  | 7.9726811  | 17.1559566 |
| H | 1.8190980  | 6.3429587  | 17.0208646 |
| C | 3.6690682  | 7.8650003  | 10.6426210 |
| C | 3.9841060  | 9.0696628  | 11.2927917 |
| H | 3.7981927  | 9.1830052  | 12.3612222 |
| C | 4.5555610  | 10.1256110 | 10.5835377 |

|                                      |            |            |            |
|--------------------------------------|------------|------------|------------|
| H                                    | 4.7987839  | 11.0540091 | 11.1010681 |
| C                                    | 4.8219953  | 9.9948514  | 9.2188289  |
| H                                    | 5.2676291  | 10.8220848 | 8.6668464  |
| C                                    | 4.5312623  | 8.7934719  | 8.5691752  |
| H                                    | 4.7562637  | 8.6789136  | 7.5085287  |
| C                                    | 3.9678563  | 7.7307979  | 9.2755918  |
| H                                    | 3.7804931  | 6.7913750  | 8.7560380  |
| <b>Sb<sup>2+</sup>, Figure 3 (b)</b> |            |            |            |
| P                                    | 1.1539893  | 5.3295382  | 10.5994785 |
| N                                    | 3.2691057  | 4.1583926  | 8.9484718  |
| N                                    | 1.9398167  | 5.5685463  | 7.9251082  |
| C                                    | 2.2089956  | 4.9950349  | 9.1321458  |
| C                                    | 3.6590345  | 4.1932597  | 7.6212873  |
| C                                    | 2.8181391  | 5.0834103  | 6.9751288  |
| C                                    | 3.8608406  | 3.3171392  | 10.0293782 |
| H                                    | 3.3770857  | 3.6902095  | 10.9369982 |
| C                                    | 3.4732066  | 1.8494031  | 9.8577124  |
| H                                    | 2.3860267  | 1.7349079  | 9.7682535  |
| H                                    | 3.8011621  | 1.2908785  | 10.7438190 |
| H                                    | 3.9487232  | 1.3883575  | 8.9835304  |
| C                                    | 5.3613252  | 3.5512765  | 10.1889601 |
| H                                    | 5.9541142  | 3.1037414  | 9.3842378  |
| H                                    | 5.6843239  | 3.0865058  | 11.1295616 |
| H                                    | 5.5956425  | 4.6220987  | 10.2491246 |
| C                                    | 0.8039941  | 6.5131351  | 7.6973324  |
| H                                    | 0.4949338  | 6.7888498  | 8.7145928  |
| C                                    | -0.3611649 | 5.7870215  | 7.0276391  |
| H                                    | -0.1116796 | 5.4419025  | 6.0164540  |
| H                                    | -1.2134146 | 6.4734497  | 6.9429499  |
| H                                    | -0.6805525 | 4.9187731  | 7.6199217  |
| C                                    | 1.2421572  | 7.7888335  | 6.9832478  |
| H                                    | 2.1657061  | 8.1910369  | 7.4161323  |
| H                                    | 0.4547987  | 8.5427247  | 7.1120649  |
| H                                    | 1.3813746  | 7.6469219  | 5.9060274  |
| C                                    | 4.7888459  | 3.4238358  | 7.0309944  |
| H                                    | 4.8322396  | 2.3943089  | 7.4019344  |
| H                                    | 5.7580589  | 3.9009858  | 7.2358449  |
| H                                    | 4.6737612  | 3.3761352  | 5.9425727  |
| C                                    | 2.8366558  | 5.4679094  | 5.5369314  |
| H                                    | 1.8323460  | 5.4890558  | 5.0982575  |
| H                                    | 3.4275011  | 4.7406972  | 4.9689755  |
| H                                    | 3.2953110  | 6.4548615  | 5.3838153  |
| C                                    | 0.8943840  | 3.6673122  | 11.3224822 |
| C                                    | -0.0590691 | 2.8541910  | 10.6878027 |
| H                                    | -0.5595659 | 3.2005628  | 9.7812072  |
| C                                    | -0.3736216 | 1.6011420  | 11.2140886 |
| H                                    | -1.1072433 | 0.9713646  | 10.7106921 |
| C                                    | 0.2405008  | 1.1614905  | 12.3901338 |
| H                                    | -0.0112866 | 0.1849990  | 12.8037905 |
| C                                    | 1.1711215  | 1.9764625  | 13.0393263 |
| H                                    | 1.6470569  | 1.6365566  | 13.9595437 |
| C                                    | 1.4986168  | 3.2243130  | 12.5076775 |
| H                                    | 2.2446681  | 3.8422682  | 13.0139767 |
| P                                    | 2.8317093  | 6.1979475  | 11.8203343 |
| N                                    | 2.8689433  | 7.9063024  | 14.0002686 |
| N                                    | 0.8310929  | 7.1333207  | 13.8115686 |
| C                                    | 2.0717468  | 7.0892766  | 13.2566841 |
| C                                    | 2.1230129  | 8.4966984  | 15.0097937 |
| C                                    | 0.8396414  | 8.0055652  | 14.8968018 |
| C                                    | 4.3344395  | 8.0639087  | 13.7591940 |
| H                                    | 4.5178317  | 7.4523426  | 12.8631499 |

|   |            |            |            |
|---|------------|------------|------------|
| C | 5.1512720  | 7.4428249  | 14.8916436 |
| H | 4.8402087  | 6.4074237  | 15.0830764 |
| H | 6.2090313  | 7.4322940  | 14.5984054 |
| H | 5.0799547  | 8.0075410  | 15.8284277 |
| C | 4.7045203  | 9.5039633  | 13.4168824 |
| H | 4.6460407  | 10.1672743 | 14.2874512 |
| H | 5.7414599  | 9.5258011  | 13.0579892 |
| H | 4.0611793  | 9.9013288  | 12.6216074 |
| C | -0.3273961 | 6.3124774  | 13.3653340 |
| H | 0.0531470  | 5.7881880  | 12.4819582 |
| C | -0.6971452 | 5.2426422  | 14.3915850 |
| H | -1.2117271 | 5.6535005  | 15.2676120 |
| H | -1.3784621 | 4.5235875  | 13.9183677 |
| H | 0.1897071  | 4.6932272  | 14.7295622 |
| C | -1.4963442 | 7.1739854  | 12.8975534 |
| H | -1.1702511 | 7.9255726  | 12.1663984 |
| H | -2.2361395 | 6.5267474  | 12.4089028 |
| H | -2.0025142 | 7.6831278  | 13.7251257 |
| C | 2.6291301  | 9.5100714  | 15.9761663 |
| H | 2.7217219  | 10.5010526 | 15.5091777 |
| H | 1.9258649  | 9.6076943  | 16.8102438 |
| H | 3.6033926  | 9.2425632  | 16.3981378 |
| C | -0.3454357 | 8.3633475  | 15.7246465 |
| H | -0.9495908 | 7.4925355  | 15.9992602 |
| H | -0.0123620 | 8.8353949  | 16.6552856 |
| H | -0.9990213 | 9.0823231  | 15.2097661 |
| C | 3.0880440  | 7.6381284  | 10.7028458 |
| C | 2.1964898  | 8.7196093  | 10.6285166 |
| H | 1.2783804  | 8.7156249  | 11.2180164 |
| C | 2.4904394  | 9.8135150  | 9.8153434  |
| H | 1.8020351  | 10.6578672 | 9.7707144  |
| C | 3.6686846  | 9.8307535  | 9.0615842  |
| H | 3.9015489  | 10.6921793 | 8.4354132  |
| C | 4.5497500  | 8.7481004  | 9.1158023  |
| H | 5.4715097  | 8.7627263  | 8.5337092  |
| C | 4.2640887  | 7.6570838  | 9.9390566  |
| H | 4.9709159  | 6.8281644  | 10.0066037 |

**5b<sup>2+</sup>, Figure 3 (c)**

|   |            |           |            |
|---|------------|-----------|------------|
| P | 1.3104866  | 5.6784783 | 10.4505066 |
| N | 3.1848672  | 4.0094315 | 8.9401690  |
| N | 1.7655188  | 5.1800841 | 7.7457494  |
| C | 2.1455842  | 4.8893286 | 9.0246018  |
| C | 3.4686477  | 3.7577064 | 7.6090462  |
| C | 2.5720569  | 4.4969408 | 6.8553298  |
| C | 3.8954649  | 3.4424052 | 10.1265469 |
| H | 3.3011432  | 3.8010747 | 10.9757297 |
| C | 3.8569846  | 1.9153548 | 10.1422528 |
| H | 2.8408258  | 1.5350754 | 9.9833149  |
| H | 4.1891079  | 1.5720253 | 11.1304185 |
| H | 4.5266808  | 1.4682435 | 9.3995440  |
| C | 5.3067067  | 4.0158099 | 10.2489385 |
| H | 5.9842062  | 3.6338931 | 9.4758831  |
| H | 5.7229525  | 3.7226565 | 11.2213597 |
| H | 5.3068543  | 5.1123772 | 10.1994945 |
| C | 0.6200977  | 6.0824770 | 7.4083431  |
| H | 0.1805762  | 6.3026340 | 8.3924090  |
| C | -0.4378643 | 5.3607112 | 6.5760392  |
| H | -0.1259748 | 5.1973035 | 5.5384265  |
| H | -1.3426855 | 5.9815200 | 6.5505064  |
| H | -0.7077131 | 4.3944442 | 7.0224146  |

|   |            |            |            |
|---|------------|------------|------------|
| C | 1.1088937  | 7.4013730  | 6.8139589  |
| H | 1.8153203  | 7.9022540  | 7.4889501  |
| H | 0.2460356  | 8.0643895  | 6.6682423  |
| H | 1.5904281  | 7.2753446  | 5.8364446  |
| C | 4.5099864  | 2.8213233  | 7.1042338  |
| H | 5.4448768  | 2.8849918  | 7.6703336  |
| H | 4.7398129  | 3.0556562  | 6.0587741  |
| H | 4.1634227  | 1.7782785  | 7.1358462  |
| C | 2.4448871  | 4.5202774  | 5.3717052  |
| H | 1.6823214  | 3.8098948  | 5.0211093  |
| H | 3.3970174  | 4.2268907  | 4.9146173  |
| H | 2.1858270  | 5.5116314  | 4.9869698  |
| C | 0.7652536  | 4.2312799  | 11.4264421 |
| C | 0.5309758  | 2.9860256  | 10.8210046 |
| H | 0.7792251  | 2.8293329  | 9.7711250  |
| C | -0.0435870 | 1.9437880  | 11.5480588 |
| H | -0.2245378 | 0.9838728  | 11.0635998 |
| C | -0.3926009 | 2.1285473  | 12.8874297 |
| H | -0.8415648 | 1.3127188  | 13.4534440 |
| C | -0.1828175 | 3.3699114  | 13.4916588 |
| H | -0.4734257 | 3.5269241  | 14.5307255 |
| C | 0.3818536  | 4.4187190  | 12.7661023 |
| H | 0.5029900  | 5.3885822  | 13.2480204 |
| P | 3.1339200  | 6.3982007  | 11.6244702 |
| N | 1.2575080  | 8.0703963  | 13.1231514 |
| N | 2.6312663  | 6.8573188  | 14.3289637 |
| C | 2.2828598  | 7.1733957  | 13.0474227 |
| C | 0.9516620  | 8.3087563  | 14.4517976 |
| C | 1.8187230  | 7.5418694  | 15.2126324 |
| C | 0.5814456  | 8.6665226  | 11.9306507 |
| H | 1.1797374  | 8.2998593  | 11.0877827 |
| C | 0.6625108  | 10.1917557 | 11.9316920 |
| H | 1.6880624  | 10.5402703 | 12.1022683 |
| H | 0.3474397  | 10.5550632 | 10.9450387 |
| H | 0.0001598  | 10.6493692 | 12.6747755 |
| C | -0.8424281 | 8.1328315  | 11.7781875 |
| H | -1.5237567 | 8.5247913  | 12.5426578 |
| H | -1.2324032 | 8.4477237  | 10.8017813 |
| H | -0.8726173 | 7.0362054  | 11.8146028 |
| C | 3.7540461  | 5.9305324  | 14.6760272 |
| H | 4.2098062  | 5.7176210  | 13.6977422 |
| C | 4.8065983  | 6.6221482  | 15.5402353 |
| H | 4.4755418  | 6.7772488  | 16.5731504 |
| H | 5.6996196  | 5.9849622  | 15.5765244 |
| H | 5.1028574  | 7.5892098  | 15.1130479 |
| C | 3.2314155  | 4.6117358  | 15.2407656 |
| H | 2.5263517  | 4.1357608  | 14.5467162 |
| H | 4.0795379  | 3.9306884  | 15.3897026 |
| H | 2.7364796  | 4.7312568  | 16.2124236 |
| C | -0.0799642 | 9.2592148  | 14.9500673 |
| H | -1.0035927 | 9.2259568  | 14.3635176 |
| H | -0.3370304 | 9.0131613  | 15.9864671 |
| H | 0.2901671  | 10.2946152 | 14.9431757 |
| C | 1.9142801  | 7.4944464  | 16.6980595 |
| H | 2.6780561  | 8.1897381  | 17.0754893 |
| H | 0.9565259  | 7.7929490  | 17.1398217 |
| H | 2.1530731  | 6.4941562  | 17.0725986 |
| C | 3.6709312  | 7.8583791  | 10.6634931 |
| C | 3.9756762  | 9.0702196  | 11.3050415 |
| H | 3.7824945  | 9.1921956  | 12.3712807 |
| C | 4.5468251  | 10.1227157 | 10.5905268 |

|   |           |            |            |
|---|-----------|------------|------------|
| H | 4.7821062 | 11.0567087 | 11.1016274 |
| C | 4.8230885 | 9.9812683  | 9.2288174  |
| H | 5.2692559 | 10.8053922 | 8.6727005  |
| C | 4.5424075 | 8.7728633  | 8.5879981  |
| H | 4.7745818 | 8.6498477  | 7.5298199  |
| C | 3.9795296 | 7.7135284  | 9.3000131  |
| H | 3.8000456 | 6.7689120  | 8.7874997  |

**6a<sup>3+</sup>**

|   |            |           |            |
|---|------------|-----------|------------|
| P | 0.0015848  | 8.0973924 | 36.2421549 |
| P | 0.6987790  | 6.1993891 | 37.2293033 |
| N | 2.1701071  | 4.4929498 | 35.5861175 |
| N | 0.2816160  | 4.9800281 | 34.5915215 |
| C | 0.9931637  | 5.1652010 | 35.7382717 |
| C | 2.2184010  | 3.9129144 | 34.3286544 |
| C | 1.0267501  | 4.2217164 | 33.6981814 |
| C | 3.3390294  | 3.0858375 | 33.7979794 |
| H | 4.3185312  | 3.4517415 | 34.1219602 |
| H | 3.3289159  | 3.1027404 | 32.7022396 |
| H | 3.2519071  | 2.0358084 | 34.1115515 |
| C | 0.6083194  | 3.8416575 | 32.3201478 |
| H | -0.3844698 | 3.3769934 | 32.2906401 |
| H | 1.3139667  | 3.1111499 | 31.9104179 |
| H | 0.5958019  | 4.7073865 | 31.6430520 |
| C | 3.1584156  | 4.3145917 | 36.6983441 |
| H | 2.6522637  | 4.7793878 | 37.5568021 |
| C | 4.4429881  | 5.0966188 | 36.4510192 |
| H | 4.9981809  | 4.7455060 | 35.5722317 |
| H | 5.1024042  | 4.9812599 | 37.3205020 |
| H | 4.2300924  | 6.1667074 | 36.3307515 |
| C | 3.3681291  | 2.8366414 | 37.0227702 |
| H | 2.4105270  | 2.3096432 | 37.1242796 |
| H | 3.8960336  | 2.7621123 | 37.9822314 |
| H | 3.9792301  | 2.3184585 | 36.2753673 |
| C | -1.1506144 | 5.3606681 | 34.4569124 |
| H | -1.3370485 | 5.9774966 | 35.3465576 |
| C | -1.4254041 | 6.2214315 | 33.2280485 |
| H | -0.7228376 | 7.0613096 | 33.1721203 |
| H | -2.4410807 | 6.6309482 | 33.3089550 |
| H | -1.3754433 | 5.6523903 | 32.2931453 |
| C | -2.0390076 | 4.1182047 | 34.5351851 |
| H | -1.8572439 | 3.4264348 | 33.7050466 |
| H | -3.0911948 | 4.4216778 | 34.4783517 |
| H | -1.8885537 | 3.5734932 | 35.4749419 |
| C | -0.7803412 | 5.3954233 | 38.0421564 |
| H | -1.6931205 | 5.6085262 | 37.4596783 |
| C | -0.5729917 | 3.8731756 | 38.1249256 |
| H | 0.3490103  | 3.6611403 | 38.6934133 |
| H | -0.4363488 | 3.4353250 | 37.1243135 |
| C | -1.7692335 | 3.2166881 | 38.8312843 |
| H | -2.6709434 | 3.3497010 | 38.2083597 |
| H | -1.5997870 | 2.1331611 | 38.9060745 |
| C | -2.0085528 | 3.8203026 | 40.2190674 |
| H | -1.1636420 | 3.5626978 | 40.8793769 |
| H | -2.9023484 | 3.3733187 | 40.6756546 |
| C | -2.1516035 | 5.3445032 | 40.1534633 |
| H | -3.0727308 | 5.6091950 | 39.6051265 |
| H | -2.2562354 | 5.7655655 | 41.1635422 |
| C | -0.9503341 | 5.9884946 | 39.4490401 |
| H | -0.0326952 | 5.8022107 | 40.0320909 |
| H | -1.0807473 | 7.0801548 | 39.3999807 |

|   |            |            |            |
|---|------------|------------|------------|
| P | 1.2952468  | 9.6509852  | 37.2322330 |
| N | 2.0370581  | 11.7804127 | 35.5924829 |
| N | 2.5509701  | 9.9030283  | 34.5908278 |
| C | 2.0420238  | 10.4247170 | 35.7415573 |
| C | 2.5089450  | 12.1144470 | 34.3333049 |
| C | 2.8315383  | 10.9290484 | 33.6979599 |
| C | 2.6638246  | 13.4998221 | 33.8058005 |
| H | 1.8681738  | 14.1695566 | 34.1483969 |
| H | 2.6326563  | 13.4882141 | 32.7102668 |
| H | 3.6259431  | 13.9415371 | 34.1028108 |
| C | 3.3611969  | 10.7582356 | 32.3163281 |
| H | 4.2624188  | 10.1349364 | 32.2811088 |
| H | 3.6330382  | 11.7357730 | 31.9044923 |
| H | 2.6152652  | 10.3107847 | 31.6441561 |
| C | 1.7014202  | 12.7227694 | 36.7080890 |
| H | 1.5582397  | 12.0501348 | 37.5660119 |
| C | 0.3787890  | 13.4412812 | 36.4685597 |
| H | 0.4019314  | 14.1052359 | 35.5956141 |
| H | 0.1474045  | 14.0618746 | 37.3439301 |
| H | -0.4383437 | 12.7198168 | 36.3412698 |
| C | 2.8755376  | 13.6464118 | 37.0284762 |
| H | 3.8129631  | 13.0837144 | 37.1262295 |
| H | 2.6778131  | 14.1391500 | 37.9893030 |
| H | 3.0131462  | 14.4356111 | 36.2812188 |
| C | 2.9380185  | 8.4727533  | 34.4504761 |
| H | 2.5033407  | 8.0004423  | 35.3422663 |
| C | 2.3225904  | 7.8059201  | 33.2249488 |
| H | 1.2441762  | 7.9956738  | 33.1751820 |
| H | 2.4750354  | 6.7211047  | 33.3050359 |
| H | 2.7859072  | 8.1332222  | 32.2878159 |
| C | 4.4590694  | 8.3277067  | 34.5185699 |
| H | 4.9617976  | 8.8406226  | 33.6908195 |
| H | 4.7244963  | 7.2662129  | 34.4495828 |
| H | 4.8591938  | 8.7226764  | 35.4601577 |
| C | 2.7321901  | 8.7693168  | 38.0422663 |
| H | 2.9995318  | 7.8702649  | 37.4603488 |
| C | 3.9511350  | 9.7053105  | 38.1191320 |
| H | 3.6804966  | 10.6122570 | 38.6875919 |
| H | 4.2596458  | 10.0399702 | 37.1171506 |
| C | 5.1172757  | 8.9919171  | 38.8215146 |
| H | 5.4447737  | 8.1410365  | 38.1985719 |
| H | 5.9752726  | 9.6754954  | 38.8904758 |
| C | 4.7176796  | 8.4886397  | 40.2124189 |
| H | 4.5253834  | 9.3518072  | 40.8709280 |
| H | 5.5511957  | 7.9351659  | 40.6667770 |
| C | 3.4645816  | 7.6091058  | 40.1547383 |
| H | 3.6885988  | 6.6750091  | 39.6093230 |
| H | 3.1545163  | 7.3134904  | 41.1669046 |
| C | 2.3069245  | 8.3300995  | 39.4514913 |
| H | 2.0130280  | 9.2208069  | 40.0328114 |
| H | 1.4246402  | 7.6736884  | 39.4072984 |
| P | -1.9943598 | 8.4432912  | 37.2215651 |
| N | -4.2103429 | 8.0341168  | 35.5795215 |
| N | -2.8343743 | 9.4117976  | 34.5789110 |
| C | -3.0352424 | 8.7103806  | 35.7292992 |
| C | -4.7333725 | 8.2779845  | 34.3199369 |
| C | -3.8640502 | 9.1467349  | 33.6856156 |
| C | -6.0118891 | 7.7242499  | 33.7906254 |
| H | -6.1934374 | 6.6974855  | 34.1249993 |
| H | -5.9879966 | 7.7118392  | 32.6952451 |
| H | -6.8745899 | 8.3343101  | 34.0942735 |

|   |            |            |            |
|---|------------|------------|------------|
| C | -3.9786019 | 9.6915285  | 32.3041683 |
| H | -3.8850377 | 10.7836593 | 32.2692261 |
| H | -4.9621240 | 9.4429546  | 31.8912312 |
| H | -3.2196684 | 9.2664772  | 31.6320789 |
| C | -4.8660189 | 7.2786250  | 36.6951254 |
| H | -4.2146122 | 7.4906518  | 37.5552417 |
| C | -4.8329910 | 5.7731396  | 36.4600127 |
| H | -5.4057986 | 5.4638214  | 35.5768458 |
| H | -5.2739315 | 5.2666583  | 37.3282088 |
| H | -3.7994141 | 5.4185868  | 36.3535460 |
| C | -6.2518285 | 7.8404384  | 37.0078535 |
| H | -6.2300958 | 8.9343259  | 37.0964415 |
| H | -6.5826893 | 7.4323901  | 37.9715124 |
| H | -7.0037860 | 7.5606025  | 36.2618459 |
| C | -1.7856357 | 10.4582191 | 34.4392639 |
| H | -1.1591369 | 10.3149307 | 35.3302019 |
| C | -0.9026309 | 10.2575155 | 33.2118807 |
| H | -0.5323884 | 9.2274435  | 33.1586074 |
| H | -0.0364511 | 10.9276621 | 33.2922568 |
| H | -1.4184833 | 10.4996775 | 32.2762332 |
| C | -2.4163436 | 11.8498773 | 34.5087326 |
| H | -3.1096139 | 12.0328325 | 33.6799403 |
| H | -1.6278047 | 12.6093626 | 34.4418344 |
| H | -2.9598407 | 11.9988649 | 35.4496618 |
| C | -1.9458218 | 10.1251807 | 38.0379083 |
| H | -1.2974713 | 10.8056533 | 37.4599858 |
| C | -3.3644670 | 10.7171294 | 38.1151825 |
| H | -4.0179075 | 10.0276229 | 38.6766659 |
| H | -3.8040249 | 10.8246362 | 37.1121024 |
| C | -3.3284871 | 12.0787851 | 38.8279214 |
| H | -2.7539225 | 12.7911316 | 38.2110474 |
| H | -4.3493911 | 12.4801707 | 38.8992576 |
| C | -2.6937624 | 11.9745035 | 40.2190696 |
| H | -3.3462218 | 11.3735288 | 40.8736769 |
| H | -2.6295957 | 12.9702116 | 40.6793818 |
| C | -1.3057937 | 11.3273116 | 40.1578481 |
| H | -0.6087154 | 11.9896436 | 39.6155912 |
| H | -0.8952846 | 11.2003331 | 41.1696589 |
| C | -1.3543837 | 9.9675141  | 39.4475487 |
| H | -1.9817446 | 9.2674646  | 40.0245155 |
| H | -0.3461118 | 9.5286577  | 39.4016612 |

**7b<sup>2+</sup>**

|    |           |            |           |
|----|-----------|------------|-----------|
| Pd | 2.1451176 | 2.6116209  | 4.1167959 |
| Pd | 4.8725006 | 2.5786358  | 4.2237178 |
| P  | 3.5464424 | 4.4924578  | 3.6751626 |
| P  | 3.4787096 | 0.6633554  | 4.5258659 |
| P  | 7.0123797 | 2.2478807  | 3.6091659 |
| P  | 0.0492267 | 2.6030410  | 3.2952233 |
| N  | 4.6929706 | 6.9103155  | 4.6987454 |
| N  | 2.8532573 | 6.2780325  | 5.7278147 |
| N  | 4.0772391 | -0.1744951 | 7.1399529 |
| N  | 2.2814581 | -1.1818371 | 6.3618697 |
| C  | 3.6858981 | 5.9677467  | 4.6746603 |
| C  | 5.9580238 | 6.7038453  | 3.9566572 |
| H  | 5.7062080 | 5.9341178  | 3.2188013 |
| C  | 7.0114146 | 6.1106396  | 4.8883986 |
| H  | 7.3070995 | 6.8072557  | 5.6853683 |
| H  | 7.9056676 | 5.8427821  | 4.3121918 |
| H  | 6.6100348 | 5.1936521  | 5.3396532 |
| C  | 6.4322988 | 7.9417592  | 3.2014970 |

|   |            |            |            |
|---|------------|------------|------------|
| H | 5.6206512  | 8.3818461  | 2.6084323  |
| H | 7.2274074  | 7.6364589  | 2.5091697  |
| H | 6.8458076  | 8.7112887  | 3.8657848  |
| C | 4.4971145  | 7.7783147  | 5.7722703  |
| C | 5.3591011  | 8.9545637  | 6.0749471  |
| H | 6.4202378  | 8.6873597  | 6.1734294  |
| H | 5.0434205  | 9.4119002  | 7.0206208  |
| H | 5.2842915  | 9.7265375  | 5.2945314  |
| C | 3.3580968  | 7.3767851  | 6.4215389  |
| C | 2.7186064  | 7.9871144  | 7.6211837  |
| H | 1.8359257  | 8.5927826  | 7.3668899  |
| H | 3.4350462  | 8.6439794  | 8.1291881  |
| H | 2.3995425  | 7.2251576  | 8.3442336  |
| C | 1.5903422  | 5.5570918  | 5.9799236  |
| H | 1.4846021  | 4.9241658  | 5.0802185  |
| C | 1.7159803  | 4.6054029  | 7.1678264  |
| H | 2.5248798  | 3.8852416  | 6.9845957  |
| H | 0.7797828  | 4.0421616  | 7.2764516  |
| H | 1.9104309  | 5.1312916  | 8.1139304  |
| C | 0.3802984  | 6.4849472  | 6.0449158  |
| H | 0.3124583  | 7.0430700  | 6.9879083  |
| H | -0.5300882 | 5.8789382  | 5.9541601  |
| H | 0.3907628  | 7.2005458  | 5.2111291  |
| C | 3.6975166  | 5.0999615  | 1.9856276  |
| C | 3.7519459  | 4.1128747  | 0.9731045  |
| H | 3.7375512  | 3.0621035  | 1.2665643  |
| C | 3.8223539  | 4.4612684  | -0.3708805 |
| H | 3.8585813  | 3.6744082  | -1.1260845 |
| C | 3.8491102  | 5.8063399  | -0.7576300 |
| H | 3.9104181  | 6.0799427  | -1.8111253 |
| C | 3.7708520  | 6.7948943  | 0.2313058  |
| H | 3.7676163  | 7.8497234  | -0.0521071 |
| C | 3.6815280  | 6.4503064  | 1.5778758  |
| H | 3.5814498  | 7.2395046  | 2.3242626  |
| C | 3.2924458  | -0.3089893 | 6.0142972  |
| C | 5.3303177  | 0.6054605  | 7.1469934  |
| H | 5.4670079  | 0.8619725  | 6.0804035  |
| C | 6.5367116  | -0.2178917 | 7.5911246  |
| H | 6.5667875  | -0.3912617 | 8.6748962  |
| H | 7.4508851  | 0.3241864  | 7.3182411  |
| H | 6.5558068  | -1.1887624 | 7.0781433  |
| C | 5.1644431  | 1.9280382  | 7.8921720  |
| H | 4.3532073  | 2.5142343  | 7.4400056  |
| H | 6.0923653  | 2.5072887  | 7.8019934  |
| H | 4.9516983  | 1.7897695  | 8.9621069  |
| C | 3.5391567  | -0.9255452 | 8.1841406  |
| C | 4.1273211  | -1.0214585 | 9.5498563  |
| H | 5.0223717  | -1.6603674 | 9.5791814  |
| H | 3.3915434  | -1.4506055 | 10.2407229 |
| H | 4.4126117  | -0.0366556 | 9.9417645  |
| C | 2.4271473  | -1.5618481 | 7.6954899  |
| C | 1.5481408  | -2.5392561 | 8.3962147  |
| H | 0.4852618  | -2.2663334 | 8.3427055  |
| H | 1.8248131  | -2.5899060 | 9.4558216  |
| H | 1.6503638  | -3.5522056 | 7.9791820  |
| C | 1.0492240  | -1.2934364 | 5.5476545  |
| H | 1.3376457  | -0.8759018 | 4.5755132  |
| C | 0.5915295  | -2.7317169 | 5.3242194  |
| H | 1.4209916  | -3.3676788 | 4.9897075  |
| H | -0.1693174 | -2.7285843 | 4.5326564  |
| H | 0.1397360  | -3.1770528 | 6.2196201  |

|   |            |            |            |
|---|------------|------------|------------|
| C | -0.0350834 | -0.3868628 | 6.1259689  |
| H | -0.3771013 | -0.7208907 | 7.1158093  |
| H | -0.8988784 | -0.3660757 | 5.4495746  |
| H | 0.3612735  | 0.6340407  | 6.2055400  |
| C | 3.4147175  | -0.5532445 | 3.1973358  |
| C | 3.3981125  | -1.9557958 | 3.3405618  |
| H | 3.4270467  | -2.3985410 | 4.3369927  |
| C | 3.3641539  | -2.7912363 | 2.2263421  |
| H | 3.3401823  | -3.8738226 | 2.3702116  |
| C | 3.3737989  | -2.2590146 | 0.9314580  |
| H | 3.3537869  | -2.9160928 | 0.0618185  |
| C | 3.4365167  | -0.8696505 | 0.7734747  |
| H | 3.4694899  | -0.4337264 | -0.2263523 |
| C | 3.4521699  | -0.0316813 | 1.8824046  |
| H | 3.4911939  | 1.0511593  | 1.7518656  |
| C | 7.8810085  | 3.5431535  | 2.6461535  |
| C | 7.1125517  | 4.2492760  | 1.7071443  |
| H | 6.0585814  | 4.0011863  | 1.5833897  |
| C | 7.6762930  | 5.2695425  | 0.9430041  |
| H | 7.0574173  | 5.7959279  | 0.2146722  |
| C | 9.0172080  | 5.6202842  | 1.1306841  |
| H | 9.4611013  | 6.4288358  | 0.5477321  |
| C | 9.7890314  | 4.9282721  | 2.0697815  |
| H | 10.8372904 | 5.1945572  | 2.2167129  |
| C | 9.2300152  | 3.8874934  | 2.8154295  |
| H | 9.8440498  | 3.3477638  | 3.5368187  |
| C | 8.2507277  | 1.8640727  | 4.9093711  |
| C | 8.2961778  | 2.7096009  | 6.0314602  |
| H | 7.5952048  | 3.5420955  | 6.0950402  |
| C | 9.2173044  | 2.4935683  | 7.0552521  |
| H | 9.2400283  | 3.1643503  | 7.9157509  |
| C | 10.0990677 | 1.4104079  | 6.9868127  |
| H | 10.8134794 | 1.2312241  | 7.7914165  |
| C | 10.0561389 | 0.5573920  | 5.8802844  |
| H | 10.7429808 | -0.2881156 | 5.8158840  |
| C | 9.1447752  | 0.7850432  | 4.8471194  |
| H | 9.1266412  | 0.1206593  | 3.9836667  |
| C | 7.1127787  | 0.7896715  | 2.5067984  |
| C | 7.4991785  | 0.8680897  | 1.1623910  |
| H | 7.8197399  | 1.8218975  | 0.7436067  |
| C | 7.4684062  | -0.2693821 | 0.3525092  |
| H | 7.7584451  | -0.1911872 | -0.6966031 |
| C | 7.0728477  | -1.4993572 | 0.8806402  |
| H | 7.0404113  | -2.3853527 | 0.2455603  |
| C | 6.6989702  | -1.5873476 | 2.2240814  |
| H | 6.3668089  | -2.5390592 | 2.6379031  |
| C | 6.7008016  | -0.4499349 | 3.0259823  |
| H | 6.3488488  | -0.5100864 | 4.0565107  |
| C | -0.0241063 | 3.4483767  | 1.6716967  |
| C | -0.4626185 | 2.8242810  | 0.4965342  |
| H | -0.8242549 | 1.7968176  | 0.5284428  |
| C | -0.4318442 | 3.5109989  | -0.7195158 |
| H | -0.7645230 | 3.0092022  | -1.6298637 |
| C | 0.0169367  | 4.8317685  | -0.7713175 |
| H | 0.0468384  | 5.3648780  | -1.7225951 |
| C | 0.4439184  | 5.4642352  | 0.3994410  |
| H | 0.8204478  | 6.4861155  | 0.3646368  |
| C | 0.4383206  | 4.7737612  | 1.6076607  |
| H | 0.8280191  | 5.2478703  | 2.5097362  |
| C | -0.7798689 | 1.0054914  | 2.9455730  |
| C | -2.1353966 | 0.7452870  | 3.1941565  |

|   |            |            |           |
|---|------------|------------|-----------|
| H | -2.7761761 | 1.5303470  | 3.5965176 |
| C | -2.6679837 | -0.5200350 | 2.9349909 |
| H | -3.7218526 | -0.7149402 | 3.1417380 |
| C | -1.8620035 | -1.5301279 | 2.4007338 |
| H | -2.2843987 | -2.5148188 | 2.1942777 |
| C | -0.5137658 | -1.2715556 | 2.1326004 |
| H | 0.1315763  | -2.0461570 | 1.7155877 |
| C | 0.0238991  | -0.0178479 | 2.4188301 |
| H | 1.0816579  | 0.1713665  | 2.2379328 |
| C | -1.2345417 | 3.4844879  | 4.2684525 |
| C | -2.0744302 | 4.4761720  | 3.7411799 |
| H | -1.9899526 | 4.7512255  | 2.6901035 |
| C | -3.0184421 | 5.1115831  | 4.5510823 |
| H | -3.6616332 | 5.8830724  | 4.1243596 |
| C | -3.1497563 | 4.7578651  | 5.8967834 |
| H | -3.8902367 | 5.2534694  | 6.5259527 |
| C | -2.3211608 | 3.7655914  | 6.4307394 |
| H | -2.4128612 | 3.4820462  | 7.4806058 |
| C | -1.3660096 | 3.1465424  | 5.6266788 |
| H | -0.7074758 | 2.3871498  | 6.0489358 |

## 4. X-ray Diffraction Refinements

### 4.1. General Remarks

Suitable single crystals were coated with Paratone-N oil or Fomblin Y25 PFPE oil, mounted using a glass fiber and frozen in the cold nitrogen stream. X-ray diffraction data were collected at 100 K on a Rigaku Oxford Diffraction SuperNova diffractometer using Cu K $\alpha$  radiation ( $\lambda = 1.54184 \text{ \AA}$ ) generated by a micro-focus source. The data reduction and absorption correction was performed using CrysAlisPro<sup>10</sup>, respectively. Using Olex2<sup>11</sup>, the structures were solved with SHELXT<sup>12</sup> by direct methods and refined with SHELXL<sup>13</sup> by least-square minimization against  $F^2$  using first isotropic and later anisotropic thermal parameters for all non-hydrogen atoms. Hydrogen atoms were added to the structure models on calculated positions using the riding model. Images of the structures were produced with the Olex2 software.

## 4.2. Crystallographic data

| Compound                                         | 2a[OTf]                                                                           | 2b[OTf]·C <sub>6</sub> H <sub>5</sub> F                                           | 5a[OTf] <sub>2</sub> ·CH <sub>2</sub> Cl <sub>2</sub>                                                                      | 5b[OTf] <sub>2</sub>                                                                                       | 5c[OTf] <sub>2</sub>                                                                                       |
|--------------------------------------------------|-----------------------------------------------------------------------------------|-----------------------------------------------------------------------------------|----------------------------------------------------------------------------------------------------------------------------|------------------------------------------------------------------------------------------------------------|------------------------------------------------------------------------------------------------------------|
| <b>Empirical formula</b>                         | C <sub>18</sub> H <sub>31</sub> ClF <sub>3</sub> N <sub>2</sub> O <sub>3</sub> PS | C <sub>24</sub> H <sub>30</sub> ClF <sub>4</sub> N <sub>2</sub> O <sub>3</sub> PS | C <sub>38</sub> H <sub>66</sub> Cl <sub>4</sub> F <sub>6</sub> N <sub>4</sub> O <sub>6</sub> P <sub>2</sub> S <sub>2</sub> | C <sub>36</sub> H <sub>50</sub> F <sub>6</sub> N <sub>4</sub> O <sub>6</sub> P <sub>2</sub> S <sub>2</sub> | C <sub>34</sub> H <sub>48</sub> F <sub>6</sub> N <sub>6</sub> O <sub>6</sub> P <sub>2</sub> S <sub>2</sub> |
| <b>Formula weight [g/mol]</b>                    | 478.93                                                                            | 568.98                                                                            | 1056.80                                                                                                                    | 874.86                                                                                                     | 876.84                                                                                                     |
| <b>Temperature [K]</b>                           | 100.01(10)                                                                        | 100.01(10)                                                                        | 100.00(10)                                                                                                                 | 200.00(10)                                                                                                 | 100.01(10)                                                                                                 |
| <b>Crystal system</b>                            | orthorhombic                                                                      | monoclinic                                                                        | monoclinic                                                                                                                 | monoclinic                                                                                                 | monoclinic                                                                                                 |
| <b>Space group</b>                               | Pna2 <sub>1</sub>                                                                 | P2 <sub>1</sub> /c                                                                | P2 <sub>1</sub> /c                                                                                                         | P2 <sub>1</sub> /c                                                                                         | P2 <sub>1</sub> /n                                                                                         |
| <b>a [Å]</b>                                     | 12.93012(14)                                                                      | 10.5631(2)                                                                        | 9.6285(3)                                                                                                                  | 7.96005(6)                                                                                                 | 7.88912(4)                                                                                                 |
| <b>b [Å]</b>                                     | 10.76679(12)                                                                      | 9.37960(10)                                                                       | 24.5346(7)                                                                                                                 | 12.02181(9)                                                                                                | 35.09855(17)                                                                                               |
| <b>c [Å]</b>                                     | 16.9595(2)                                                                        | 27.2987(4)                                                                        | 11.7235(3)                                                                                                                 | 22.34595(15)                                                                                               | 22.64824(12)                                                                                               |
| <b>α [°]</b>                                     | 90                                                                                | 90                                                                                | 90                                                                                                                         | 90                                                                                                         | 90                                                                                                         |
| <b>β [°]</b>                                     | 90                                                                                | 96.6200(10)                                                                       | 112.159(3)                                                                                                                 | 99.1657(6)                                                                                                 | 98.2437(5)                                                                                                 |
| <b>γ [°]</b>                                     | 90                                                                                | 90                                                                                | 90                                                                                                                         | 90                                                                                                         | 90                                                                                                         |
| <b>Volume [Å<sup>3</sup>]</b>                    | 2361.03(5)                                                                        | 2686.66(7)                                                                        | 2564.91(14)                                                                                                                | 2111.08(3)                                                                                                 | 6206.43(6)                                                                                                 |
| <b>Z</b>                                         | 4                                                                                 | 4                                                                                 | 2                                                                                                                          | 2                                                                                                          | 6                                                                                                          |
| <b>ρ<sub>calc</sub> [g/cm<sup>3</sup>]</b>       | 1.347                                                                             | 1.407                                                                             | 1.368                                                                                                                      | 1.376                                                                                                      | 1.408                                                                                                      |
| <b>μ [mm<sup>-1</sup>]</b>                       | 3.300                                                                             | 3.055                                                                             | 4.025                                                                                                                      | 2.508                                                                                                      | 2.575                                                                                                      |
| <b>F(000)</b>                                    | 1008.0                                                                            | 1184.0                                                                            | 1108.0                                                                                                                     | 916.0                                                                                                      | 2748.0                                                                                                     |
| <b>Crystal size [mm<sup>3</sup>]</b>             | 0.19 × 0.164 × 0.102                                                              | 0.331 × 0.225 × 0.198                                                             | 0.164 × 0.1 × 0.079                                                                                                        | 0.252 × 0.176 × 0.112                                                                                      | 0.187 × 0.14 × 0.081                                                                                       |
| <b>Radiation (λ in Å)</b>                        | CuKα (λ = 1.54184)                                                                | CuKα (λ = 1.54184)                                                                | CuKα (λ = 1.54184)                                                                                                         | CuKα (λ = 1.54184)                                                                                         | CuKα (λ = 1.54184)                                                                                         |
| <b>2θ range for data collection [°]</b>          | 9.73 to 153.624                                                                   | 6.52 to 153.134                                                                   | 7.206 to 153.502                                                                                                           | 8.016 to 153.128                                                                                           | 4.678 to 153.49                                                                                            |
| <b>Index ranges</b>                              | -16 ≤ h ≤ 16, -13 ≤ k ≤ 11, -21 ≤ l ≤ 21                                          | -13 ≤ h ≤ 9, -7 ≤ k ≤ 11, -34 ≤ l ≤ 29                                            | -11 ≤ h ≤ 12, -28 ≤ k ≤ 30, -14 ≤ l ≤ 13                                                                                   | -9 ≤ h ≤ 6, -14 ≤ k ≤ 15, -27 ≤ l ≤ 27                                                                     | -9 ≤ h ≤ 9, -42 ≤ k ≤ 43, -28 ≤ l ≤ 28                                                                     |
| <b>Reflections collected</b>                     | 23232                                                                             | 14240                                                                             | 20967                                                                                                                      | 11092                                                                                                      | 68320                                                                                                      |
| <b>Independent reflections</b>                   | 4871 [R <sub>int</sub> = 0.0435, R <sub>sigma</sub> = 0.0247]                     | 5587 [R <sub>int</sub> = 0.0332, R <sub>sigma</sub> = 0.0395]                     | 5355 [R <sub>int</sub> = 0.0493, R <sub>sigma</sub> = 0.0339]                                                              | 4372 [R <sub>int</sub> = 0.0120, R <sub>sigma</sub> = 0.0129]                                              | 12985 [R <sub>int</sub> = 0.0276, R <sub>sigma</sub> = 0.0196]                                             |
| <b>Data/restraints/parameters</b>                | 4871/1/277                                                                        | 5587/0/361                                                                        | 5355/48/386                                                                                                                | 4372/253/332                                                                                               | 12985/224/863                                                                                              |
| <b>Goodness-of-fit on F<sup>2</sup></b>          | 1.043                                                                             | 1.021                                                                             | 1.052                                                                                                                      | 1.026                                                                                                      | 1.020                                                                                                      |
| <b>Final R indexes (I ≥ 2σ (I))</b>              | R <sub>1</sub> = 0.0400, wR <sub>2</sub> = 0.1074                                 | R <sub>1</sub> = 0.0445, wR <sub>2</sub> = 0.1163                                 | R <sub>1</sub> = 0.0689, wR <sub>2</sub> = 0.1840                                                                          | R <sub>1</sub> = 0.0385, wR <sub>2</sub> = 0.1056                                                          | R <sub>1</sub> = 0.0487, wR <sub>2</sub> = 0.1248                                                          |
| <b>Final R indexes (all data)</b>                | R <sub>1</sub> = 0.0405, wR <sub>2</sub> = 0.1081                                 | R <sub>1</sub> = 0.0532, wR <sub>2</sub> = 0.1245                                 | R <sub>1</sub> = 0.0740, wR <sub>2</sub> = 0.1890                                                                          | R <sub>1</sub> = 0.0395, wR <sub>2</sub> = 0.1066                                                          | R <sub>1</sub> = 0.0511, wR <sub>2</sub> = 0.1268                                                          |
| <b>Largest diff. peak/hole [e/Å<sup>3</sup>]</b> | 0.51/-0.23                                                                        | 0.55/-0.70                                                                        | 0.75/-0.61                                                                                                                 | 0.52/-0.32                                                                                                 | 0.51/-0.58                                                                                                 |
| <b>Flack Parameter</b>                           | 0.002(17)                                                                         | ---                                                                               | ---                                                                                                                        | ---                                                                                                        | ---                                                                                                        |
| <b>CCDC Number</b>                               | 2524562                                                                           | 2524560                                                                           | 2524561                                                                                                                    | 2524563                                                                                                    | 2524566                                                                                                    |

| Compound                                         | 6a[OTf] <sub>3</sub> ·CH <sub>3</sub> CN                                                                    | 6b[OTf] <sub>3</sub> ·4CH <sub>2</sub> Cl <sub>2</sub>                                                                     | 7b[OTf] <sub>2</sub> ·4CH <sub>2</sub> Cl <sub>2</sub>                                                                                     | 8[OTf] <sub>2</sub> ·4C <sub>6</sub> H <sub>4</sub> F <sub>2</sub> ·Et <sub>2</sub> O                                        | 9[OTf] <sub>2</sub> ·4C <sub>6</sub> H <sub>4</sub> F <sub>2</sub> ·0.5THF                                     |
|--------------------------------------------------|-------------------------------------------------------------------------------------------------------------|----------------------------------------------------------------------------------------------------------------------------|--------------------------------------------------------------------------------------------------------------------------------------------|------------------------------------------------------------------------------------------------------------------------------|----------------------------------------------------------------------------------------------------------------|
| <b>Empirical formula</b>                         | C <sub>60</sub> H <sub>102</sub> F <sub>9</sub> N <sub>9</sub> O <sub>9</sub> P <sub>4</sub> S <sub>3</sub> | C <sub>58</sub> H <sub>83</sub> Cl <sub>8</sub> F <sub>9</sub> N <sub>6</sub> O <sub>9</sub> P <sub>4</sub> S <sub>3</sub> | C <sub>76</sub> H <sub>88</sub> Cl <sub>8</sub> F <sub>6</sub> N <sub>4</sub> O <sub>6</sub> P <sub>4</sub> Pd <sub>2</sub> S <sub>2</sub> | C <sub>88</sub> H <sub>110</sub> F <sub>10</sub> N <sub>4</sub> O <sub>7</sub> P <sub>4</sub> Pd <sub>2</sub> S <sub>2</sub> | C <sub>47</sub> H <sub>75</sub> F <sub>8</sub> N <sub>4</sub> O <sub>6.5</sub> P <sub>3</sub> PdS <sub>2</sub> |
| <b>Formula weight [g/mol]</b>                    | 1484.56                                                                                                     | 1682.96                                                                                                                    | 1951.90                                                                                                                                    | 1926.59                                                                                                                      | 1215.54                                                                                                        |
| <b>Temperature [K]</b>                           | 100.01(10)                                                                                                  | 100.01(10)                                                                                                                 | 100.01(10)                                                                                                                                 | 100.01(10)                                                                                                                   | 100.00(10)                                                                                                     |
| <b>Crystal system</b>                            | trigonal                                                                                                    | triclinic                                                                                                                  | triclinic                                                                                                                                  | monoclinic                                                                                                                   | monoclinic                                                                                                     |
| <b>Space group</b>                               | R3c                                                                                                         | P-1                                                                                                                        | P-1                                                                                                                                        | I2/a                                                                                                                         | P2 <sub>1</sub> /c                                                                                             |
| <b>a [Å]</b>                                     | 14.02799(8)                                                                                                 | 14.3379(3)                                                                                                                 | 14.2227(2)                                                                                                                                 | 26.0433(3)                                                                                                                   | 16.6307(4)                                                                                                     |
| <b>b [Å]</b>                                     | 14.02799(8)                                                                                                 | 16.0023(3)                                                                                                                 | 17.67070(10)                                                                                                                               | 16.79110(10)                                                                                                                 | 14.8734(2)                                                                                                     |
| <b>c [Å]</b>                                     | 68.3806(5)                                                                                                  | 19.1242(4)                                                                                                                 | 18.94390(10)                                                                                                                               | 23.4811(2)                                                                                                                   | 23.4810(4)                                                                                                     |
| <b>α [°]</b>                                     | 90                                                                                                          | 74.3662(18)                                                                                                                | 100.7730(10)                                                                                                                               | 90                                                                                                                           | 90                                                                                                             |
| <b>β [°]</b>                                     | 90                                                                                                          | 85.3052(17)                                                                                                                | 96.8500(10)                                                                                                                                | 121.4210(10)                                                                                                                 | 106.231(2)                                                                                                     |
| <b>γ [°]</b>                                     | 120                                                                                                         | 68.1297(18)                                                                                                                | 108.2840(10)                                                                                                                               | 90                                                                                                                           | 90                                                                                                             |
| <b>Volume [Å<sup>3</sup>]</b>                    | 11653.45(16)                                                                                                | 3920.54(15)                                                                                                                | 4359.50(8)                                                                                                                                 | 8762.45(16)                                                                                                                  | 5576.65(19)                                                                                                    |
| <b>Z</b>                                         | 6                                                                                                           | 2                                                                                                                          | 2                                                                                                                                          | 4                                                                                                                            | 4                                                                                                              |
| <b>ρ<sub>calc</sub> [g/cm<sup>3</sup>]</b>       | 1.269                                                                                                       | 1.426                                                                                                                      | 1.487                                                                                                                                      | 1.460                                                                                                                        | 1.448                                                                                                          |
| <b>μ [mm<sup>-1</sup>]</b>                       | 2.300                                                                                                       | 4.789                                                                                                                      | 7.257                                                                                                                                      | 5.096                                                                                                                        | 4.856                                                                                                          |
| <b>F(000)</b>                                    | 4716.0                                                                                                      | 1740.0                                                                                                                     | 1988.0                                                                                                                                     | 3984.0                                                                                                                       | 2528.0                                                                                                         |
| <b>Crystal size [mm<sup>3</sup>]</b>             | 0.315 × 0.254 × 0.102                                                                                       | 0.55 × 0.335 × 0.109                                                                                                       | 0.213 × 0.178 × 0.111                                                                                                                      | 0.144 × 0.09 × 0.06                                                                                                          | 0.173 × 0.035 × 0.019                                                                                          |
| <b>Radiation (λ in Å)</b>                        | CuKα (λ = 1.54184)                                                                                          | CuKα (λ = 1.54184)                                                                                                         | CuKα (λ = 1.54184)                                                                                                                         | Cu Kα (λ = 1.54184)                                                                                                          | Cu Kα (λ = 1.54184)                                                                                            |
| <b>2θ range for data collection [°]</b>          | 7.722 to 152.074                                                                                            | 4.8 to 153.67                                                                                                              | 4.838 to 153.464                                                                                                                           | 6.598 to 153.606                                                                                                             | 5.534 to 136.49                                                                                                |
| <b>Index ranges</b>                              | -14 ≤ h ≤ 17, -16 ≤ k ≤ 17, -85 ≤ l ≤ 85                                                                    | -17 ≤ h ≤ 17, -20 ≤ k ≤ 14, -23 ≤ l ≤ 23                                                                                   | -17 ≤ h ≤ 17, -22 ≤ k ≤ 21, -23 ≤ l ≤ 20                                                                                                   | -31 ≤ h ≤ 32, -21 ≤ k ≤ 20, -27 ≤ l ≤ 29                                                                                     | -18 ≤ h ≤ 20, -12 ≤ k ≤ 17, -28 ≤ l ≤ 27                                                                       |
| <b>Reflections collected</b>                     | 33073                                                                                                       | 42231                                                                                                                      | 50554                                                                                                                                      | 40986                                                                                                                        | 25258                                                                                                          |
| <b>Independent reflections</b>                   | 5261 [R <sub>int</sub> = 0.0246, R <sub>sigma</sub> = 0.0154]                                               | 16256 [R <sub>int</sub> = 0.0513, R <sub>sigma</sub> = 0.0513]                                                             | 18157 [R <sub>int</sub> = 0.0283, R <sub>sigma</sub> = 0.0338]                                                                             | 9092 [R <sub>int</sub> = 0.0446, R <sub>sigma</sub> = 0.0301]                                                                | 9837 [R <sub>int</sub> = 0.0428, R <sub>sigma</sub> = 0.0456]                                                  |
| <b>Data/restraints/parameters</b>                | 5261/433/477                                                                                                | 16256/1069/1178                                                                                                            | 18157/480/1067                                                                                                                             | 9092/911/617                                                                                                                 | 9837/1140/883                                                                                                  |
| <b>Goodness-of-fit on F<sup>2</sup></b>          | 1.083                                                                                                       | 1.019                                                                                                                      | 1.028                                                                                                                                      | 1.054                                                                                                                        | 1.020                                                                                                          |
| <b>Final R indexes (I ≥ 2σ (I))</b>              | R <sub>1</sub> = 0.0696, wR <sub>2</sub> = 0.1896                                                           | R <sub>1</sub> = 0.0642, wR <sub>2</sub> = 0.1749                                                                          | R <sub>1</sub> = 0.0392, wR <sub>2</sub> = 0.1077                                                                                          | R <sub>1</sub> = 0.0431, wR <sub>2</sub> = 0.1158                                                                            | R <sub>1</sub> = 0.0531, wR <sub>2</sub> = 0.1413                                                              |
| <b>Final R indexes (all data)</b>                | R <sub>1</sub> = 0.0701, wR <sub>2</sub> = 0.1913                                                           | R <sub>1</sub> = 0.0696, wR <sub>2</sub> = 0.1817                                                                          | R <sub>1</sub> = 0.0412, wR <sub>2</sub> = 0.1098                                                                                          | R <sub>1</sub> = 0.0458, wR <sub>2</sub> = 0.1188                                                                            | R <sub>1</sub> = 0.0636, wR <sub>2</sub> = 0.1512                                                              |
| <b>Largest diff. peak/hole [e/Å<sup>3</sup>]</b> | 0.97/-0.48                                                                                                  | 0.82/-0.88                                                                                                                 | 1.42/-1.53                                                                                                                                 | 0.86/-0.88                                                                                                                   | 1.41/-0.76                                                                                                     |
| <b>Flack parameter</b>                           | 0.07(4)                                                                                                     | ----                                                                                                                       | ----                                                                                                                                       | ----                                                                                                                         | ----                                                                                                           |
| <b>CCDC Number</b>                               | 2524564                                                                                                     | 2524565                                                                                                                    | 2524569                                                                                                                                    | 2524568                                                                                                                      | 2524567                                                                                                        |

| <b>Compound</b>                                  | <b>10[OTf]<sub>2</sub>·1,5CH<sub>2</sub>Cl<sub>2</sub>·0,5MeCN</b>                                                                 | <b>11[OTf]·CH<sub>2</sub>Cl<sub>2</sub></b>                                                                   | <b>12[OTf]<sub>2</sub>·MeCN</b>                                                              |
|--------------------------------------------------|------------------------------------------------------------------------------------------------------------------------------------|---------------------------------------------------------------------------------------------------------------|----------------------------------------------------------------------------------------------|
| <b>Empirical formula</b>                         | C <sub>56.5</sub> H <sub>81.5</sub> AuCl <sub>3</sub> F <sub>6</sub> N <sub>4.5</sub> O <sub>6</sub> P <sub>4</sub> S <sub>2</sub> | C <sub>36</sub> H <sub>64</sub> Cl <sub>2</sub> F <sub>3</sub> N <sub>4</sub> O <sub>3</sub> P <sub>3</sub> S | C <sub>32</sub> H <sub>54</sub> F <sub>6</sub> N <sub>5</sub> O <sub>6</sub> PS <sub>2</sub> |
| <b>Formula weight [g/mol]</b>                    | 1525.07                                                                                                                            | 853.78                                                                                                        | 813.89                                                                                       |
| <b>Temperature [K]</b>                           | 100.01(10)                                                                                                                         | 100.01(10)                                                                                                    | 100.01(10)                                                                                   |
| <b>Crystal system</b>                            | monoclinic                                                                                                                         | monoclinic                                                                                                    | triclinic                                                                                    |
| <b>Space group</b>                               | P2 <sub>1</sub> /c                                                                                                                 | P2 <sub>1</sub> /c                                                                                            | P-1                                                                                          |
| <b>a [Å]</b>                                     | 25.5676(7)                                                                                                                         | 17.24000(10)                                                                                                  | 11.1951(5)                                                                                   |
| <b>b [Å]</b>                                     | 16.6234(3)                                                                                                                         | 14.58910(10)                                                                                                  | 11.9364(7)                                                                                   |
| <b>c [Å]</b>                                     | 17.3590(4)                                                                                                                         | 17.7842(2)                                                                                                    | 17.3601(11)                                                                                  |
| <b>α [°]</b>                                     | 90                                                                                                                                 | 90                                                                                                            | 88.986(5)                                                                                    |
| <b>β [°]</b>                                     | 109.614(3)                                                                                                                         | 96.1790(10)                                                                                                   | 73.486(5)                                                                                    |
| <b>γ [°]</b>                                     | 90                                                                                                                                 | 90                                                                                                            | 62.793(5)                                                                                    |
| <b>Volume [Å<sup>3</sup>]</b>                    | 6949.8(3)                                                                                                                          | 4447.03(6)                                                                                                    | 1960.8(2)                                                                                    |
| <b>Z</b>                                         | 4                                                                                                                                  | 4                                                                                                             | 2                                                                                            |
| <b>ρ<sub>calc</sub> [g/cm<sup>3</sup>]</b>       | 1.458                                                                                                                              | 1.275                                                                                                         | 1.378                                                                                        |
| <b>μ [mm<sup>-1</sup>]</b>                       | 7.010                                                                                                                              | 3.190                                                                                                         | 2.286                                                                                        |
| <b>F(000)</b>                                    | 3104.0                                                                                                                             | 1816.0                                                                                                        | 860.0                                                                                        |
| <b>Crystal size [mm<sup>3</sup>]</b>             | 0.241 × 0.139 × 0.021                                                                                                              | 0.169 × 0.147 × 0.136                                                                                         | 0.266 × 0.045 × 0.024                                                                        |
| <b>Radiation (λ in Å)</b>                        | Cu Kα (λ = 1.54184)                                                                                                                | Cu Kα (λ = 1.54184)                                                                                           | CuKα (λ = 1.54184)                                                                           |
| <b>2θ range for data collection [°]</b>          | 6.46 to 136.502                                                                                                                    | 5.156 to 153.612                                                                                              | 5.356 to 144.248                                                                             |
| <b>Index ranges</b>                              | -30 ≤ h ≤ 24, -20 ≤ k ≤ 20, -14 ≤ l ≤ 20                                                                                           | -21 ≤ h ≤ 18, -18 ≤ k ≤ 17, -22 ≤ l ≤ 22                                                                      | -9 ≤ h ≤ 13, -14 ≤ k ≤ 14, -19 ≤ l ≤ 21                                                      |
| <b>Reflections collected</b>                     | 72425                                                                                                                              | 51699                                                                                                         | 19200                                                                                        |
| <b>Independent reflections</b>                   | 12719 [R <sub>int</sub> = 0.0656, R <sub>sigma</sub> = 0.0430]                                                                     | 9329 [R <sub>int</sub> = 0.0370, R <sub>sigma</sub> = 0.0216]                                                 | 7718 [R <sub>int</sub> = 0.0420, R <sub>sigma</sub> = 0.0511]                                |
| <b>Data/restraints/parameters</b>                | 12719/346/861                                                                                                                      | 9329/50/567                                                                                                   | 7718/1374/757                                                                                |
| <b>Goodness-of-fit on F<sup>2</sup></b>          | 1.066                                                                                                                              | 1.030                                                                                                         | 1.025                                                                                        |
| <b>Final R indexes (I &gt;= 2σ (I))</b>          | R <sub>1</sub> = 0.0502, wR <sub>2</sub> = 0.1281                                                                                  | R <sub>1</sub> = 0.0530, wR <sub>2</sub> = 0.1423                                                             | R <sub>1</sub> = 0.0703, wR <sub>2</sub> = 0.1909                                            |
| <b>Final R indexes (all data)</b>                | R <sub>1</sub> = 0.0571, wR <sub>2</sub> = 0.1331                                                                                  | R <sub>1</sub> = 0.0546, wR <sub>2</sub> = 0.1442                                                             | R <sub>1</sub> = 0.0843, wR <sub>2</sub> = 0.2070                                            |
| <b>Largest diff. peak/hole [e/Å<sup>3</sup>]</b> | 2.39/-2.03                                                                                                                         | 1.14/-0.73                                                                                                    | 1.07/-0.58                                                                                   |
| <b>CCDC Number</b>                               | 2524572                                                                                                                            | 2524571                                                                                                       | 2524570                                                                                      |

## 5. References

- 1 J. Fidelius, K. Schwedtmann, S. Schellhammer, J. Haberstroh, S. Schulz, R. Huang, M. C. Klotzsche, A. Bauzá, A. Frontera, S. Reineke and J. J. Weigand, *Chem*, 2024, **10**, 644.
- 2 W. Kaim, *J. Am. Chem. Soc.*, 1983, **105**, 707.
- 3 R. Ahlrichs, M. Bär, M. Häser, H. Horn and C. Kölmel, *Chem. Phys. Lett.*, 1989, **162**, 165.
- 4 a) A. D. Becke, *J. Chem. Phys.*, 1996, **104**, 1040; b) J. P. Perdew, *Phys. Rev. B*, 1986, **33**, 8822;
- 5 S. Grimme, J. Antony, S. Ehrlich and H. Krieg, *J. Chem. Phys.*, 2010, **132**, 154104.
- 6 A. Klamt, *WIREs Comput Mol Sci*, 2011, **1**, 699.
- 7 F. Neese, F. Wennmohs, U. Becker and C. Riplinger, *J. Chem. Phys.*, 2020, **152**, 224108.
- 8 P. Pracht, F. Bohle and S. Grimme, *Phys. Chem. Chem. Phys.*, 2020, **22**, 7169.
- 9 K. C. Ramey, D. J. Louick, P. W. Whitehurst, W. B. Wise, R. Mukherjee and R. M. Moriarty, *Org. Magn. Reson.*, 1971, **3**, 201.
- 10 Oxford Diffraction / Agilent Technologies UK Ltd, CrysAlisPRO.
- 11 O. V. Dolomanov, L. J. Bourhis, R. J. Gildea, J. A. K. Howard and H. Puschmann, *J Appl Crystallogr*, 2009, **42**, 339.
- 12 G. M. Sheldrick, *Acta Crystallogr. A*, 2015, **71**, 3.
- 13 G. M. Sheldrick, *Acta Crystallogr. C*, 2015, **71**, 3.
